# Supplementary material for: Can obesity and physical activity predict outcomes of elective knee or hip surgery due to osteoarthritis? A meta-analysis of cohort studies
Source: PubMed Central journal article supplement — BMJ Open. 2018 Feb 27;8(2):e017689. doi: 10.1136/bmjopen-2017-017689 (PMC5855486; doi:10.1136/bmjopen-2017-017689), 2018-02-27
Supplement: bmjopen-2017-017689.draft_revisions.pdf [file bmjopen-2017-017689.draft_revisions.pdf]

# BMJ Open

BMJ Open is committed to open peer review. As part of this commitment we make the peer review history of every article we publish publicly available.

When an article is published we post the peer reviewers' comments and the authors' responses online. We also post the versions of the paper that were used during peer review. These are the versions that the peer review comments apply to.

The versions of the paper that follow are the versions that were submitted during the peer review process. They are not the versions of record or the final published versions. They should not be cited or distributed as the published version of this manuscript.

BMJ Open is an open access journal and the full, final, typeset and author-corrected version of record of the manuscript is available on our site with no access controls, subscription charges or pay-per-view fees (<http://bmjopen.bmj.com>).

If you have any questions on BMJ Open's open peer review process please email [editorial.bmjopen@bmj.com](mailto:editorial.bmjopen@bmj.com)

# BMJ Open

## Can obesity and physical activity predict outcomes of elective knee or hip surgery due to osteoarthritis? – A meta-analysis of cohort studies.

|                                 |                                                                                                                                                                                                                                                                                                                                                                |
|---------------------------------|----------------------------------------------------------------------------------------------------------------------------------------------------------------------------------------------------------------------------------------------------------------------------------------------------------------------------------------------------------------|
| Journal:                        | <i>BMJ Open</i>                                                                                                                                                                                                                                                                                                                                                |
| Manuscript ID                   | bmjopen-2017-017689                                                                                                                                                                                                                                                                                                                                            |
| Article Type:                   | Research                                                                                                                                                                                                                                                                                                                                                       |
| Date Submitted by the Author:   | 10-May-2017                                                                                                                                                                                                                                                                                                                                                    |
| Complete List of Authors:       | Pozzobon, Daniel; University of Sydney - Camperdown and Darlington Campus, Rheumatology<br>Ferreira, Paulo; University of Sydney, Faculty of Health Science<br>Blyth, Fiona; University of Sydney, Concord Hospital<br>Machado, Gustavo; University of Sydney - Camperdown and Darlington Campus<br>Ferreira, Manuela; The George Institute for Global Health, |
| <b>Primary Subject Heading</b>: | Rheumatology                                                                                                                                                                                                                                                                                                                                                   |
| Secondary Subject Heading:      | Public health, Epidemiology, Surgery                                                                                                                                                                                                                                                                                                                           |
| Keywords:                       | RHEUMATOLOGY, Hip < ORTHOPAEDIC & TRAUMA SURGERY, Knee < ORTHOPAEDIC & TRAUMA SURGERY, Surgical pathology < PATHOLOGY                                                                                                                                                                                                                                          |
|                                 |                                                                                                                                                                                                                                                                                                                                                                |

SCHOLARONE™  
Manuscripts

Only

1  
2  
3 **Can obesity and physical activity predict outcomes of elective knee**  
4 **or hip surgery due to osteoarthritis? – A meta-analysis of cohort**  
5 **studies.**  
6  
7  
8  
9

10  
11 Daniel Pozzobon<sup>1</sup>, Paulo H Ferreira<sup>2</sup>, Fiona M Blyth<sup>3</sup>, Gustavo C Machado<sup>4</sup>, Manuela L  
12 Ferreira<sup>1</sup>  
13  
14

15  
16 <sup>1</sup> Institute of Bone and Joint Research, The Kolling Institute, Sydney Medical School,  
17 University of Sydney, Sydney, NSW  
18

19  
20 <sup>2</sup> Discipline of Physiotherapy, Faculty of Health Sciences, University of Sydney, Sydney, NSW  
21

22 <sup>3</sup> Concord Clinical School, University of Sydney, Sydney, NSW  
23

24 <sup>4</sup> School of Public Health, The University of Sydney, Sydney, NSW  
25  
26  
27

28  
29 Correspondence to: D. Pozzobon, Royal North Shore Hospital, Department of  
30 Rheumatology, 7C – Clinical Administration, St Leonards, NSW 2065, Australia  
31 (dpoz5597@uni.sydney.edu.au, ph 0404 967 756).  
32  
33  
34

35  
36 Word count: 3,799.  
37  
38  
39  
40  
41  
42  
43  
44  
45  
46  
47  
48  
49  
50  
51  
52  
53  
54  
55  
56  
57  
58  
59  
60

## Abstract

**Objective:** The aim of this study was to systematically review the literature to identify whether obesity or the regular practice of physical activity are predictors of clinical outcomes in patients undergoing elective hip and knee arthroplasty due to osteoarthritis searching the Medline, CINAHL, EMBASE, and Web of Science electronic databases.

**Design:** Systematic review and meta-analysis.

**Eligibility criteria for selecting studies:** Longitudinal cohort studies were included in the review. To be included, studies needed to assess the association between obesity or physical activity participation assessed at baseline and clinical outcomes (i.e. pain, disability, and adverse events) following hip or knee arthroplasty.

**Data extraction:** Two independent reviewers extracted data on pain, disability, quality of life, obesity, physical activity and any postsurgical complications.

**Results:** 63 full papers were included in this systematic review. From these, 31 were included in the meta-analyses. Our meta-analysis showed that non-obese participants tended to suffer less pain, less disability and report fewer postsurgical complications when compared to the obese participants.

**Limitations of this review:** We have dichotomized follow-up duration into short-term or long-term follow-up. There was large heterogeneity in duration of follow-ups within each category. Only four studies assessed the impact of physical activity participation on surgical outcomes and given their methodological discrepancies, no pooled analysis was conducted.

**Conclusions:** Pre-surgical obesity is associated with worse clinical outcomes of hip or knee arthroplasty in terms of pain, disability and complications in patients with osteoarthritis. No impact of physical activity participation has been observed.

**Systematic review registration:** PROSPERO registration CRD42016032711.

**Keywords:** Physical activity, obesity, arthroplasty, osteoarthritis, knee, hip, meta-analysis.

**Strengths and limitations of this study**

- The current review is the most comprehensive systematic review on the topic to date.
- The current review is the first review to use a quantitative approach to synthesize the results of pain, disability and surgical complications between non-obese and obese participants who underwent to hip or knee arthroplasty due to osteoarthritis.
- The methodological quality of the included studies was in general low.
- There was a substantial variability of follow-up duration across studies, ranging from 2 weeks to 11 years.

## Introduction

Musculoskeletal pain, including knee and hip osteoarthritis, is the leading cause of physical disability in the world and responsible for an increasing burden to patient and society.(1) This problem aggravates with time, as the world population ages and physical disability resulting from declining health becomes increasingly prevalent.(2) The global health care expenditure for knee and hip osteoarthritis is substantial and most of these costs are incurred by surgical management and associated hospital care.(3) For instance, in the UK the direct costs of osteoarthritis were estimated at more than £1 billion in 2010, of which £850 million were spent just on surgical procedures.(4)

Although management of the early stages of this condition consists of a combination of nonpharmacological and pharmacological therapies (e.g. anti-inflammatory and analgesic drugs), surgery has become the most common treatment option for severe cases, especially when nonsurgical therapies fail to provide sufficient pain relief.(5) Osteotomy, mosaicplasty and arthroplasty are some of the existing types of surgery used to manage osteoarthritis of the hip and knee; with total or partial arthroplasty being the most commonly recommended.(6)

There are multiple risk factors for the development of knee OA, among which increased body weight and muscle weakness, resulting from a sedentary lifestyle, are particularly common.(7) Likewise, obesity and sedentary lifestyle behaviour have been associated with adverse health conditions including coronary heart disease, type 2 diabetes, breast, and colon cancers, and decreased life expectancy.(8) Although there is evidence for the role of obesity and physical inactivity in health conditions and quality of life in general,(9, 10) the actual impact of these factors, together or in isolation, on the outcomes of elective surgery of the knee and hip is still controversial.(11, 12) Although previous attempts to systematically review the literature have been made, these studies(13-15) have either failed to perform a quantitative summary of the evidence (i.e. meta-analysis), to include patients undergoing knee arthroplasty(16) or pain outcomes(13). No meta-analyses have been performed considering obesity and physical activity as predictors of surgical outcomes in terms of pain, disability, quality of life and complications after hip or knee arthroplasty for end stage osteoarthritis.

1  
2  
3  
4 Identifying whether obesity and physical activity participation predict surgical outcomes in  
5 patients with knee and hip osteoarthritis will inform clinical practice in terms of prognosis  
6 and safety of an increasingly prevalent treatment approach. We have conducted a meta-  
7 analysis of cohort studies aiming to quantify the role of obesity and physical activity  
8 participation as predictors of clinical outcomes in terms of pain, disability, quality of life, and  
9 postsurgical complications. This review and meta-analysis focused on patients with knee  
10 and hip osteoarthritis undergoing hip or knee arthroplasty.  
11  
12  
13  
14  
15  
16  
17

## 18 **Methods**

### 19 *Data sources and searches*

20  
21 We conducted a systematic review following the PRISMA statement(17). This review was  
22 prospectively registered on PROSPERO, registration number CRD42016032711. A systematic  
23 electronic search was performed in the following databases from inception to January 2017:  
24 MEDLINE, EMBASE, CINAHL, and Web of Science. We used a combination of relevant  
25 keywords to construct the search strategy including: obesity, physical activity, knee  
26 osteoarthritis, hip osteoarthritis, arthroplasty, and elective surgery (Appendix Search  
27 Strategy). The first screening of potentially relevant records was conducted by one author  
28 (DP) based on titles and abstract, and two authors (DP and GM) independently performed  
29 the final selection of included trials based on full text evaluation. A third reviewer arbitrated  
30 in case of disagreement (MF). The reference list of included papers was checked for further  
31 possible studies. No restriction was applied on language.  
32  
33  
34  
35  
36  
37  
38  
39  
40  
41

### 42 *Study selection*

43  
44 We included only longitudinal studies assessing the role of obesity or physical activity  
45 participation on the clinical outcomes following partial or total hip arthroplasty (THA) or  
46 partial or total knee arthroplasty (TKA) surgery. Clinical outcomes were defined in terms of  
47 pain, disability, quality of life, and complications post arthroplasty. To be eligible, studies  
48 had to be full reports, include participants who underwent elective arthroplasty of the hip  
49 or knee due to osteoarthritis, include data of pre-surgical and at least one post-surgical  
50 assessment of the clinical outcomes of interest, and assess the association between the  
51 predictors and outcomes of interest. Obesity and physical activity participation had to be  
52  
53  
54  
55  
56  
57  
58  
59  
60

1  
2  
3 assessed at baseline. Studies on revision surgery were excluded. Studies were not excluded  
4 based on intensity or duration of symptoms.  
5  
6  
7

### 8 *Data extraction*

9  
10 Using a standardised form, data on study characteristics, predictors and outcome measures  
11 of interest were independently extracted from the included studies by two reviewers (DP  
12 and GM). A third author (MF) resolved any disagreement. Estimates of association between  
13 predictors and outcomes of interest were extracted as presented in each study, and  
14 included odds ratios, risk ratios, correlations, mean differences or regression coefficients.  
15 When studies reported more than one tool regarding the same topic (e.g. WOMAC, HOOS,  
16 OHS, KOOS, KSS) estimates were extracted from the group with the largest sample size.  
17 We contacted the authors to provide further information when there were insufficient data  
18 reported in the manuscript. When authors were unavailable we estimated data using the  
19 recommendations in the Cochrane Handbook for Systematic Reviews of Interventions.<sup>(18)</sup>  
20  
21  
22  
23  
24  
25  
26  
27

### 28 *Outcome measures*

29  
30 Data on pain intensity was extracted as visual analogue scale (VAS) scores ranging from 0 to  
31 10 and measured directly or as part of the following measurement tools: the Western  
32 Ontario and McMaster Universities Osteoarthritis Index (WOMAC), the Hip disability and  
33 Osteoarthritis Outcome Score (HOOS), the Knee disability and Osteoarthritis Outcome Score  
34 (KOOS) or the Harris Hip Score (HHS). If studies reported more than one measure for pain  
35 intensity or disability for the cohort, the most severe measure at baseline was included in  
36 the pooled analyses. Disability measures included the Oxford Hip Score (OHS), ranging from  
37 12 to 60 being 12 the best result; Oxford Knee Score (OKS) ranging from 0 to 60 being 60 the  
38 best result; the Harris Hip Score (HHS) ranging from 0 to 100 being 100 the best result; Knee  
39 Society Score (KSS) ranging from 0 to 100 being 100 the best result; WOMAC total score  
40 ranging from 0 to 96 being 0 the best result; or WOMAC function subscale, ranging from 0  
41 to 10 being 10 the best result; and were converted into a uniform 0-100 scale where 0  
42 meant less disability. Extracted data on complications included any descriptive measure of  
43 the number of complications or number of patients with a complication reported during the  
44 study. Only two of the screened studies had reported specific raw data on quality of life  
45  
46  
47  
48  
49  
50  
51  
52  
53  
54  
55  
56  
57  
58  
59  
60



1  
2  
3 among the participants after joint arthroplasty, but due to differences in follow-up length  
4 any meta-analysis made by merging this data would result in an unreliable measure.  
5  
6  
7

### 8 *Methodological Quality Assessment*

9  
10 The methodological quality of included studies was assessed using a standardized checklist  
11 based on recommendations for publishing a systematic review and the(19) and the  
12 Strengthening the Reporting of Observational Studies in Epidemiology (STROBE)  
13 guidelines.(20) The checklist comprised six items:  
14  
15

- |                                                                                                                                                                                                                                                                                                                                                                                                                                                                                                                                                                                                                                                                                       |
|---------------------------------------------------------------------------------------------------------------------------------------------------------------------------------------------------------------------------------------------------------------------------------------------------------------------------------------------------------------------------------------------------------------------------------------------------------------------------------------------------------------------------------------------------------------------------------------------------------------------------------------------------------------------------------------|
| 16<br>17<br>18 A - Participants were selected as consecutive or random cases. We considered as non-<br>19 representative samples those recruited from specific groups.<br>20<br>21 B – Full description of participant source and inclusion and exclusion criteria.<br>22<br>23 C –Outcome data were available for at least 85% of participants at 1 follow-up point.<br>24<br>25 D - Standardized and fully defined method to assess the predictor and outcome.<br>26<br>27 E - Raw data, percentages, risk estimators, and precision measure data reported at<br>28 follow-up.<br>29<br>30 F - Multivariate analysis conducted with adjustment for potentially confounding factors. |
|---------------------------------------------------------------------------------------------------------------------------------------------------------------------------------------------------------------------------------------------------------------------------------------------------------------------------------------------------------------------------------------------------------------------------------------------------------------------------------------------------------------------------------------------------------------------------------------------------------------------------------------------------------------------------------------|

31  
32 **Box 1:** Criteria used to assess the methodological quality of screened  
33

34  
35 After the independent assessment of included studies by two authors (DP and GM) each  
36 study received an unweighted methodological quality score ranging from 0 to 100  
37 expressing the percentage of fulfilled criteria (out of the total number of relevant criteria). A  
38 third reviewer (MF) resolved any disagreement. The quality scores for the studies were  
39 categorized as: good:>75%, medium: 50-75% and poor: <50% (21).  
40  
41  
42  
43  
44

### 45 *Data analysis*

46  
47 Data on baseline (i.e. pre-surgical scores) and postoperative outcome scores were weighed  
48 by the inverse study variance and used in fractional polynomial regression modelling to  
49 build graphs depicting the course of pain and disability over time. STATA14 was used for the  
50 analyses (Stata Corp LP, College Station, TX). (22)  
51  
52  
53  
54  
55  
56  
57  
58  
59  
60

1  
2  
3 Meta-analyses were performed to assess the differences in pain, disability and  
4 complications post-surgery, between predictor groups (i.e. obese and non-obese groups as  
5 defined by included studies), using a random effects model. When means and standard  
6 deviations of outcomes of interest were presented for multiple predictor groups (i.e.  
7 underweight (BMI<18), normal weight (BMI≥18<25), overweight (BMI≥25<30), and obese  
8 levels I (BMI≥30<35), II (BMI≥35<40) or III (BMI≥40)) these were combined into two groups  
9 (non-obese: BMI<30 and obese: BMI≥30) as recommended in the Cochrane Handbook for  
10 Systematic Reviews of Interventions (18) before inclusion in the pooled analyses. Results  
11 were reported as standardized mean differences (SMD) and 95% confidence intervals  
12 (95%CI). Between-study heterogeneity was calculated using  $I^2$  ( $I^2 < 25\%$ : small heterogeneity;  
13  $25\% < I^2 < 75\%$ : moderate heterogeneity;  $I^2 > 75\%$ : large heterogeneity). All meta-analyses  
14 were conducted using Comprehensive Meta-Analysis software (Comprehensive Meta-  
15 Analysis, Englewood, NJ). For studies not reporting enough data to be included in the meta-  
16 analyses, the reported individual associations were tabulated and qualitatively presented in  
17 the supplementary material.  
18  
19  
20  
21  
22  
23  
24  
25  
26  
27  
28  
29

## 30 **Results**

31  
32 Our search strategy identified 11,990 studies. Twenty-six additional studies were identified  
33 through other sources and were included for screening. After removing 381 duplicates,  
34 11,220 studies were screened and excluded based on keywords, titles and abstracts. All the  
35 remaining 389 studies were written in English and were assessed by reading the full text, of  
36 which 327 were excluded, yielding 62 studies included in the systematic review.(23-84)  
37 From these, 31 presented enough data to be included in at least one of the meta-analyses  
38 (Figure 1).  
39  
40  
41  
42  
43  
44  
45

46 **Figure 1** – Flowchart of search strategy and screening steps.  
47  
48

### 49 *Included Studies*

50  
51 Included studies reported data from 18 different countries: Australia,(39, 46, 71, 84)  
52 Canada,(37, 42, 77) China,(83) Denmark,(59) England,(26, 29) Finland,(48-51), France,(64,  
53 72) Germany,(54, 74, 80) Italy,(27, 28) Japan,(82) Netherlands,(56, 75) Norway,(44) Scotland  
54 (24, 35), South Korea,(55) Spain,(40, 79) Switzerland,(60, 61, 68) United Kingdom(25, 34, 36,  
55  
56  
57  
58  
59  
60

1  
2  
3 45, 47, 52, 62, 66, 67, 70, 73) and USA.(23, 30-33, 38, 41, 43, 53, 57, 58, 63, 65, 69, 76, 78,  
4 81) Demographic data from each study are presented in table 1.  
5  
6  
7

### 8 *Methodological Quality*

9  
10 An overall assessment of the studies showed that methodological quality ranged from 33.3  
11 to 100 points on a 0-100 scale (greater score indicate more quality), the mean  
12 methodological score for all included studies being 59.1 (SD 15). Only one study(79) fulfilled  
13 all six criteria assessed for methodological quality. Eight of the included studies(29, 41, 42,  
14 48, 51, 54, 61, 63) reached the threshold of 75% proposed by Sorensen(21) to be considered  
15 as having good methodological quality. From the screened studies, 29 studies (47%)  
16 investigated a representative sample, only 19 studies (31%) provided sufficient definition of  
17 the sample, 49 studies (79%) had a follow-up rate >85%, all studies fully defined the method  
18 of assessment of the predictors and outcomes, 30 studies (48%) reported outcome data and  
19 31 (50%) studies conducted adjustment for potentially confounding factors. The most  
20 frequent methodological flaws were not fully describing the inclusion and exclusion criteria  
21 of the subjects (n= 43 studies, 689) and not using a representative sample (n=33 studies,  
22 53%).  
23  
24  
25  
26  
27  
28  
29  
30  
31  
32  
33  
34  
35  
36  
37  
38  
39  
40  
41  
42  
43  
44  
45  
46  
47  
48  
49  
50  
51  
52  
53  
54  
55  
56  
57  
58  
59  
60

**Table 1** - Included studies and characteristics.

| Author, year           | Country        | Sample Size | Predictor | Outcomes                     | Surgery                         | Follow-Up Duration          | Quality Score |
|------------------------|----------------|-------------|-----------|------------------------------|---------------------------------|-----------------------------|---------------|
| AbdelSalam et al, 2012 | USA            | 210         | Obesity   | Complications                | Total Hip and Knee Arthroplasty | 9 years                     | 33.3          |
| Amin et al, 2006 A     | United Kingdom | 328         | Obesity   | Complications;<br>Disability | Total Knee Replacement          | 6, 18, 36 and 60 months     | 66.7          |
| Amin et al, 2006 B     | Scotland       | 82          | Obesity   | Complications                | Total Knee Replacement          | 38.5 months                 | 66.7          |
| Andrew et al, 2008     | England        | 1,059       | Obesity   | Complications;<br>Disability | Total Hip Arthroplasty          | 3, 12, 24, 36 and 60 months | 33.3          |
| Azodi et al, 2006      | Italy          | 3,309       | Obesity   | Complications                | Total Hip Replacement           | 6 to 9 years                | 50.0          |
| Azodi et al, 2008      | Italy          | 2,106       | Obesity   | Complications                | Total Knee Arthroplasty         | 2 years                     | 50.0          |
| Baker et al, 2012      | England        | 13,673      | Obesity   | Complications;<br>Disability | Total Hip Arthroplasty          | 6 months                    | 83.3          |
| Belmont et al, 2014    | USA            | 17,514      | Obesity   | Complications                | Total Knee Arthroplasty         | 1 month                     | 66.7          |
| Belmont et al, 2014    | USA            | 15,321      | Obesity   | Complications                | Total Knee Arthroplasty         | 1 month                     | 50.0          |
| Bozic et al, 2012 A    | USA            | 40,919      | Obesity   | Complications                | Total Hip Arthroplasty          | 10 years                    | 66.7          |
| Bozic et al, 2012 B    | USA            | 83,011      | Obesity   | Complications                | Total Knee Arthroplasty         | 10 years                    | 66.7          |
| Chee et al, 2010       | United Kingdom | 106         | Obesity   | Complications;<br>Disability | Total Hip Arthroplasty          | 6, 18, 36 and 60 months     | 66.7          |
| Chesney et al, 2008    | Scotland       | 1,278       | Obesity   | Complications                | Total Knee Arthroplasty         | 6, 18 and 60 months         | 50.0          |
| Collins et al, 2012    | United Kingdom | 385         | Obesity   | Complications;<br>Disability | Total Knee Arthroplasty         | 6, 18 months, 3, 6, 9 years | 66.7          |
| Davis et al, 2011      | Canada         | 931         | Obesity   | Pain                         | Total Hip and Knee Arthroplasty | 2 weeks, 1, 3, 6, 12 months | 66.7          |

1  
2  
3  
4  
5  
6  
7  
8  
9  
10  
11  
12  
13  
14  
15  
16  
17  
18  
19  
20  
21  
22  
23  
24  
25  
26  
27  
28  
29  
30  
31  
32  
33  
34  
35  
36  
37  
38  
39  
40  
41  
42  
43  
44  
45  
46  
47

|                           |                |        |         |                                    |                           |                 |      |
|---------------------------|----------------|--------|---------|------------------------------------|---------------------------|-----------------|------|
| Dewan et al, 2009         | USA            | 220    | Obesity | Complications;<br>Disability       | Total Knee Arthroplasty   | 5.4 years       | 50.0 |
| Dowsey et al, 2008        | Australia      | 1,207  | Obesity | Complications                      | Hip Arthroplasty          | 1 year          | 50.0 |
| Dowsey et al, 2010        | Australia      | 471    | Obesity | Complications; Pain;<br>Disability | Total Hip Arthroplasty    | 1 year          | 66.7 |
| Font-Vizcarra et al, 2011 | Spain          | 402    | Obesity | Complications                      | Total Hip Arthroplasty    | 3 months        | 66.7 |
| Friedman et al, 2013      | USA            | 12,355 | Obesity | Complications                      | Hip and Knee Arthroplasty | 2 months        | 83.3 |
| Gandhi et al, 2010        | Canada         | 1,224  | Obesity | Pain; Disability                   | Total Hip Arthroplasty    | 1 year          | 83.3 |
| Hamoui et al, 2006        | USA            | 63     | Obesity | Disability                         | Total Knee Arthroplasty   | 11.3 years      | 50.0 |
| Heiberg et al, 2013       | Norway         | 64     | Obesity | Pain                               | Total Hip Arthroplasty    | 3 and 12 months | 66.7 |
| Ibrahim et al, 2005       | United Kingdom | 343    | Obesity | Complications                      | Total Hip Arthroplasty    | 1 year          | 50.0 |
| Jackson et al, 2009       | Australia      | 100    | Obesity | Complications; Pain;<br>Disability | Total Knee Replacement    | 9.2 years       | 66.7 |
| Jameson et al, 2014       | United Kingdom | 5,535  | Obesity | Disability                         | Hip Arthroplasty          | 6 months        | 50.0 |
| Jamsen et al, 2010        | Finland        | 2,647  | Obesity | Complications                      | Total Knee Arthroplasty   | 1 year          | 33.3 |
| Jamsen et al, 2012        | Finland        | 7,181  | Obesity | Complications                      | Total Knee Arthroplasty   | 1 year          | 83.3 |
| Jarvenpaa et al, 2010     | Finland        | 100    | Obesity | Complications; Pain                | Total Knee Arthroplasty   | 3 months        | 50.0 |
| Jarvenpaa et al, 2012     | Finland        | 52     | Obesity | Pain; Disability                   | Total Knee Arthroplasty   | 10.8 years      | 83.3 |
| Judge et al, 2010         | United Kingdom | 908    | Obesity | Disability                         | Hip Replacement           | 1 year          | 66.7 |

|                          |                |        |         |                                 |                                    |                              |      |
|--------------------------|----------------|--------|---------|---------------------------------|------------------------------------|------------------------------|------|
| Kandil et al, 2015       | USA            | 15,770 | Obesity | Complications                   | Unicompartmental Knee Arthroplasty | 3 months                     | 50.0 |
| Kessler et al, 2007      | Germany        | 67     | Obesity | Disability                      | Total Hip Replacement              | 10 days and 3 months         | 83.3 |
| Kim et al, 2011          | South Korea    | 227    | Obesity | Complications                   | Total Knee Arthroplasty            | 6 months                     | 66.7 |
| Kort et al, 2007         | Netherlands    | 46     | Obesity | Complications                   | Unicompartmental Knee Replacement  | 2 years                      | 50.0 |
| Ledford et al, 2014      | USA            | 316    | Obesity | Complications                   | Total Hip and Knee Arthroplasty    | 2 months                     | 33.3 |
| Liabaud et al, 2013      | USA            | 273    | Obesity | Complications                   | Total Knee Arthroplasty            | 3 and 12 months              | 50.0 |
| Liljensøe et al, 2013    | Denmark        | 197    | Obesity | Pain; Disability                | Total Knee Arthroplasty            | 4 years                      | 33.3 |
| Luebbeke et al, 2007 A   | Switzerland    | 2,495  | Obesity | Complications; Disability       | Total Hip Arthroplasty             | 5 years                      | 83.3 |
| Luebbeke et al, 2007 B   | Switzerland    | 325    | Obesity | Disability                      | Total Hip Arthroplasty             | 5 years                      | 50.0 |
| Mackie et al, 2015       | United Kingdom | 1,821  | Obesity | Complications; Pain; Disability | Total Knee Arthroplasty            | 1 year                       | 33.3 |
| Madsen et al, 2014       | USA            | 79     | Obesity | Complications                   | Total Knee Arthroplasty            | 10 years                     | 83.3 |
| Maisongrosse et al, 2014 | France         | 502    | Obesity | Complications                   | Total Hip Arthroplasty             | 58 months                    | 50.0 |
| McLaughlin et al, 2006   | USA            | 198    | Obesity | Complications                   | Total Hip Replacement              | 14.5 years                   | 50.0 |
| Michalka et al, 2012     | United Kingdom | 191    | Obesity | Complications; Pain; Disability | Hip Arthroplasty                   | 6 weeks                      | 66.7 |
| Murray et al, 2013       | United Kingdom | 2,438  | Obesity | Complications; Disability       | Unicompartmental Knee Replacement  | 1 year                       | 66.7 |
| Naal et al, 2009         | Switzerland    | 83     | Obesity | Pain; Disability                | Total Knee Arthroplasty            | 6 weeks, 3, 12 and 24 months | 66.7 |
| Namba et al, 2005        | USA            | 1,813  | Obesity | Complications                   | Total Hip and Knee Arthroplasty    | 1 year                       | 50.0 |

|    |                         |                |       |                      |                              |                                       |                                |       |
|----|-------------------------|----------------|-------|----------------------|------------------------------|---------------------------------------|--------------------------------|-------|
| 1  |                         |                |       |                      |                              |                                       |                                |       |
| 2  |                         |                |       |                      |                              |                                       |                                |       |
| 3  |                         |                |       |                      |                              |                                       |                                |       |
| 4  |                         |                |       |                      |                              |                                       |                                |       |
| 5  | Napier et al, 2014      | United Kingdom | 100   | Obesity              | Complications;<br>Disability | Total Knee Arthroplasty               | 3 and 12 months                | 50.0  |
| 6  |                         |                |       |                      |                              |                                       |                                |       |
| 7  | Naylor et al, 2008      | Australia      | 99    | Obesity              | Pain                         | Total Hip and Knee Arthroplasty       | 2, 6, 12, 26 and<br>52 weeks   | 50.0  |
| 8  |                         |                |       |                      |                              |                                       |                                |       |
| 9  | Ollivier et al, 2012    | France         | 210   | Physical<br>Activity | Disability                   | Total Hip Arthroplasty                | 10 years                       | 66.7  |
| 10 |                         |                |       |                      |                              |                                       |                                |       |
| 11 | Patel et al, 2008       | United Kingdom | 527   | Obesity              | Complications                | Total Knee Replacement                | 4 weeks, 6 weeks<br>and 1 year | 66.7  |
| 12 |                         |                |       |                      |                              |                                       |                                |       |
| 13 | Pietschmann et al, 2013 | Germany        | 171   | Physical<br>Activity | Disability                   | Unicompartmental Knee<br>Arthroplasty | 4.2 years                      | 33.3  |
| 14 |                         |                |       |                      |                              |                                       |                                |       |
| 15 | Poortinga et al, 2014   | Netherlands    | 658   | Physical<br>Activity | Disability                   | Total Hip and Knee Arthroplasty       | 1 year                         | 66.7  |
| 16 |                         |                |       |                      |                              |                                       |                                |       |
| 17 | Pulido et al, 2008      | USA            | 9,245 | Obesity              | Complications                | Total Hip and Knee Arthroplasty       | 1 year                         | 50.0  |
| 18 |                         |                |       |                      |                              |                                       |                                |       |
| 19 | Rajgopal et al, 2008    | Canada         | 760   | Obesity              | Complications;<br>Disability | Total Knee Arthroplasty               | 1 year                         | 66.7  |
| 20 |                         |                |       |                      |                              |                                       |                                |       |
| 21 | Sechriest et al, 2007   | USA            | 34    | Physical<br>Activity | Disability                   | Total Hip Arthroplasty                | 5 years                        | 66.7  |
| 22 |                         |                |       |                      |                              |                                       |                                |       |
| 23 | Villalobos et al, 2013  | Spain          | 63    | Obesity              | Pain; Disability             | Total Hip Arthroplasty                | 3 months                       | 100.0 |
| 24 |                         |                |       |                      |                              |                                       |                                |       |
| 25 | Vogl et al, 2014        | Germany        | 281   | Obesity              | Disability                   | Total Hip Arthroplasty                | 6 months                       | 33.3  |
| 26 |                         |                |       |                      |                              |                                       |                                |       |
| 27 | Wang et al, 2010        | USA            | 97    | Obesity              | Disability                   | Total Hip Arthroplasty                | 3 months, 1 and<br>2 years     | 50.0  |
| 28 |                         |                |       |                      |                              |                                       |                                |       |
| 29 | Yasunaga et al, 2009    | Japan          | 3,577 | Obesity              | Complications                | Total Knee Arthroplasty               | 5 months                       | 50.0  |
| 30 |                         |                |       |                      |                              |                                       |                                |       |
| 31 | Zhang et al, 2012       | China          | 714   | Obesity              | Complications;<br>Disability | Total Hip Arthroplasty                | 5 years                        | 66.7  |
| 32 |                         |                |       |                      |                              |                                       |                                |       |
| 33 |                         |                |       |                      |                              |                                       |                                |       |
| 34 |                         |                |       |                      |                              |                                       |                                |       |
| 35 |                         |                |       |                      |                              |                                       |                                |       |
| 36 |                         |                |       |                      |                              |                                       |                                |       |
| 37 |                         |                |       |                      |                              |                                       |                                |       |
| 38 |                         |                |       |                      |                              |                                       |                                |       |
| 39 |                         |                |       |                      |                              |                                       |                                |       |
| 40 |                         |                |       |                      |                              |                                       |                                |       |
| 41 |                         |                |       |                      |                              |                                       |                                |       |
| 42 |                         |                |       |                      |                              |                                       |                                |       |
| 43 |                         |                |       |                      |                              |                                       |                                |       |
| 44 |                         |                |       |                      |                              |                                       |                                |       |
| 45 |                         |                |       |                      |                              |                                       |                                |       |
| 46 |                         |                |       |                      |                              |                                       |                                |       |
| 47 |                         |                |       |                      |                              |                                       |                                |       |

### The course of pain and disability over time

Figure 2 presents the course of disability over time for hip (A) and knee osteoarthritis (B) post-surgery; as well as pain for hip (C) and knee osteoarthritis (D). The central line represents the estimated pooled mean over time and the shaded area circumscribes its 95% confidence intervals. A total of eight studies with complete data (i.e., estimates of central tendency and variance) were included in the pain analysis and 17 studies were included in the disability analysis.

The fractional polynomial regression model resulted in a pooled mean disability score and standard deviation before hip arthroplasty of 59.42 (SD: 10.94; n=5,250). At 12 months post-surgery it had decreased to a mean of 31.31 (SD: 24.28; n= 3,017) and a further reduction was observed at 120 months, when the mean disability score after hip arthroplasty was 24.32 (SD: 19.53; n= 210). For knee osteoarthritis a pooled mean disability score of 56.88 (SD: 10.74; n= 17,225) was observed for patients undergoing arthroplasty. At 12 months after surgery this value decreased to 21.80 (SD: 13.51; n= 2,898) whilst at the 110-month follow-up, the mean disability score was 14.18 (SD: 0.77; n= 485). The pooled mean pain scores before hip arthroplasty was 54.86 (SD: 10.20; n= 2,517), decreasing to 13.76 (SD: 1.32; n= 1,058) 3 months after surgery, 10.8 (SD: 1.69; n= 1,212) at 6 months and slightly increasing to 13.45 (SD: 7.87; n= 2,173) at the 12 months follow-up. For patients undergoing knee arthroplasty, the pooled pain score at baseline was 57.78 (SD: 9.28; n= 2,211); which decreased to 25.67 (SD: 6.61; n= 1,222) at 6 months, and 14.18 (SD: 0.77; n= 1,820) at the 12-month follow-up.

**Figure 2** - Fractional polynomial analysis of pain and disability over time

### Association between obesity and post-surgical pain outcomes

Fourteen studies investigated the association between obesity and pain intensity in a total of 5,687 patients after hip or knee arthroplasty. Seven of the 14 studies presented enough data to be pooled in a meta-analysis. There was an overall significant difference in post-surgical pain between obese and non-obese patients post arthroplasty, with non-obese patients having better outcomes at short (SMD -0.43; 95%CI: -0.67 to -0.19; p=0.000), and long-term (SMD -0.36; 95%CI: -0.47 to -0.24; p=0.000). The pooled results for separate joints



suggest non-obese participants have significantly less short-term (i.e. less than 6 months) post-surgical knee pain, compared to obese participants (SMD -0.54; 95%CI: -0.90 to -0.19;  $p=0.002$ ) and post-surgical hip pain (SMD -0.34; 95%CI: -0.66 to -0.01;  $p=0.039$ ). Obesity was defined as presenting BMI over 30 kg/m<sup>2</sup>. At long term (i.e. equal or over 6 months), there was a significant difference between obese and non-obese groups in terms of knee pain (SMD -0.36; 95%CI: -0.47 to -0.24;  $p=0.000$ ), however there was no difference between groups for hip pain (SMD -0.32; 95%CI: -0.84 to 0.19;  $p=0.222$ ). The results of individual studies not included in the pooled analyses are presented in the table 2 below.

**Figure 3** - Meta-Analysis of studies addressing pain

| Obesity vs Pain |                |                  |                                                                                                                                                                        |
|-----------------|----------------|------------------|------------------------------------------------------------------------------------------------------------------------------------------------------------------------|
| Author, year    | BMI: Mean (SD) | Measure          | Results                                                                                                                                                                |
| <b>Knee</b>     |                |                  |                                                                                                                                                                        |
| Davis 2011      | NA             | HOOS / KOOS      | After adjusting for age, gender, joint and presence of back pain, an increased BMI was associated with worst pain outcomes ( $p<0.02$ ) at long term after THA or TKA. |
| Jarvenpaa 2010  | 29.7 (NA)      | VAS              | Increased BMI correlate significantly to VAS pain scale ( $r=0.236$ ; $p=0.018$ ) at short term after TKA.                                                             |
| Liljensøe 2013  | 30 (NA)        | SF-36            | BMI was <b>not</b> associated to SF-36 pain scale (OR= 0.96; $p=0.1$ ) at long term after TKA.                                                                         |
| Mackie 2015     | NA             | WOMAC            | Increased BMI was associated to less improvement in WOMAC pain scale ( $t= -2.64$ ; $p<0.001$ ) at long term after TKA.                                                |
| <b>Hip</b>      |                |                  |                                                                                                                                                                        |
| Dowsey 2010     | 29.55 (5.64)*  | Harris Hip Score | BMI was <b>not</b> associated with pain reduction ( $p=0.71$ ) at long term after THA.                                                                                 |
| Heiberg 2013    | 27 (6.27)*     | HOOS             | BMI was <b>not</b> associated with HOOS pain scale ( $p>0.05$ ) at short term after THA.                                                                               |

**Table 2** – Results of individual studies on the association between post-surgical pain and baseline obesity.

BMI – Body Mass Index; SD – Standard deviation; THA – Total hip arthroplasty; TKA – Total knee arthroplasty; OR – Odds ratio; NA – Non available; WOMAC – Western Ontario and McMaster Universities Osteoarthritis Index; HOOS - Hip dysfunction and Osteoarthritis Outcome Score; KOOS - Knee dysfunction and Osteoarthritis Outcome Score; VAS – Visual Analogue Scale; SF-36 – Short Form 36 Questionnaire; \*Calculated following guidelines from Cochrane Handbook for Systematic Reviews of Interventions.

### Association between obesity and post-surgical disability outcomes

The impact of obesity on disability was investigated by 32 studies which compared post-surgery disability scores in 35,286 obese and non-obese participants. Of these, 19 studies presented complete data to be included in the pooled analysis. At short term no statistically significant difference in overall disability between obese and non-obese participants was observed (SMD -0.15, 95% CI -0.41 to 0.10,  $p=0.231$ ) Likewise, no statistically significant difference was observed between obese and non-obese participants for post-surgical knee or hip disability (SMD -0.41, 95% CI -0.99 to 0.16,  $p=0.159$  and SMD -0.09, 95% CI -0.38 to 0.19,  $p=0.527$ , respectively).

At long term follow-up however, there was an overall significant difference in post-surgical disability between obese and non-obese patients regardless of the joint (SMD -0.32; 95%CI: -0.36 to -0.28;  $p=0.000$ ). That difference was still statistically significant when knee and hip joints were analysed separately (SMD -0.31, 95% CI -0.36 to -0.26,  $p=0.000$  and SMD -0.34, 95% CI -0.44 to -0.25,  $p=0.000$ , respectively and favouring non-obese patients). The results of individual studies not included in the pooled analyses are presented in the table 3 below.

**Figure 4** - Meta-Analysis of studies addressing disability

| Author, year   | BMI: Mean (SD) | Measure            | Results                                                                                                                                                                                              |
|----------------|----------------|--------------------|------------------------------------------------------------------------------------------------------------------------------------------------------------------------------------------------------|
| <b>Knee</b>    |                |                    |                                                                                                                                                                                                      |
| Davis 2011     | NA             | WOMAC / KOOS       | After adjusting for age, gender, joint and presence of back pain, an increased BMI was associated with worst outcomes ( $p<0.02$ ) at long term after TKA or THA.                                    |
| Dewan 2009     | 31 (0.5)       | Knee Society Score | BMI was <b>not</b> associated with worst knee function ( $p>0.119$ ) at long term after TKA.                                                                                                         |
| Hamoui 2006    | 27.93 (7.1)*   | Knee Society Score | No significant association between BMI and KSS ( $p>0.05$ ) were found at long term after TKA.                                                                                                       |
| Kort 2007      | NA             | WOMAC              | Obesity was <b>not</b> related to disability score ( $p>0.05$ ) at long term after TKA.                                                                                                              |
| Liljensøe 2013 | 30 (NA)        | Knee Society Score | Increased BMI was associated with worst knee scores (OR 0.95, 95% CI 0.9 to 1.0, $p=0.04$ ) at long term after TKA. These results did not change significantly after adjusting for age, sex, primary |

|                  |              |       |                                                                                                                                                                                                                              |
|------------------|--------------|-------|------------------------------------------------------------------------------------------------------------------------------------------------------------------------------------------------------------------------------|
|                  |              |       | disease and surgical approach (OR 0.94, 95% CI 0.90 to 0.99, p=0.02).                                                                                                                                                        |
| Mackie 2015      | NA           | WOMAC | Increased BMI was associated with less improvement in disability scores (WOMAC t= -2.13; p=0.033) at long term after TKA.                                                                                                    |
| Rajgopal 2008    | 32.3 (6.58)* | WOMAC | The morbidly obese group (BMI ≥40, n=69) does <b>not</b> present a statistically significant difference on improvement in WOMAC score (p=0.669) when compared to others BMI groups at long term after TKA.                   |
| <b>Hip</b>       |              |       |                                                                                                                                                                                                                              |
| Heiberg 2013     | 27 (6.27)*   | HHS   | Increased BMI was associated with lower HHS (p<0.05) at short term after THA.                                                                                                                                                |
| Jameson 2014     | NA           | OHS   | Increased BMI was <b>not</b> associated with changes in OHS (p>0.05) at short term after THA.                                                                                                                                |
| Luebbecke 2007 B | 26.4 (4.3)   | HHS   | Increased BMI was associated with lower hip score (r=-0.4, 95% CI -0.8 to -0.1) at long term after THA.                                                                                                                      |
| McLaughlin 2006  | 26 (NA)      | HHS   | The obese group (BMI ≥30; n=95) did <b>not</b> present any statistically significant difference from the non-obese group (BMI <30, n=103) with regards to clinical outcomes assessed by HHS (p>0.05) at long term after THA. |
| Vogl 2014        | 26.9 (4.9)   | WOMAC | Obesity was associated with changes in WOMAC score (p<0.05) at short term after THA.                                                                                                                                         |
| Wang 2010        | 29.14 (6.23) | WOMAC | Increased BMI was <b>not</b> associated with WOMAC score (p=0.114) at long term after THA.                                                                                                                                   |

**Table 3** – Results of individual studies on the association between post-surgical disability and baseline obesity.

BMI – Body Mass Index; SD – Standard deviation; NA – Non available; WOMAC – Western Ontario and McMaster Universities Osteoarthritis Index; KOOS - Knee disability and Osteoarthritis Outcome Score; TKA – Total knee arthroplasty; THA – Total hip arthroplasty; KSS – Knee Society Score; OR – Odds ratio; CI – Confidence interval; HHS – Harris Hip Score; OHS – Oxford Hip Score; r – coefficient of association; \*Calculated following guidelines from Cochrane Handbook for Systematic Reviews of Interventions.

### Association between obesity and post-surgical complications

The association between obesity and complications after joint arthroplasty was assessed by 40 studies including a total of 245,433 patients who underwent knee or hip arthroplasty. Of these, 17 presented enough data and were included in the meta-analyses.

The pooled results suggest that at short term follow-up, non-obese participants are less likely to have post-surgical deep vein thrombosis (DVT) (OR 0.48; 95% CI 0.25 to 0.91;  $p=0.024$ ) or infection (OR: 0.56; 95% CI: 0.43 to 0.72;  $p=0.000$ ) when compared with obese ones. Likewise, 13 studies were pooled ( $n=22,782$ ) showing non-obese patients are less likely to present any long-term (i.e.  $\geq 6$  months) dislocation (OR: 0.49; 95% CI: 0.31 to 0.79;  $p=0.003$ ), DVT (OR: 0.61; 95% CI: 0.37 to 0.98;  $p=0.043$ ) or infection (OR: 0.43; 95% CI: 0.25 to 0.72;  $p=0.001$ ) post-surgery, compared to obese participants. Non-significant difference between groups was observed for long-term revision surgery between obese and non-obese participants (OR: 0.66; 95% CI: 0.34 to 1.27;  $p=0.217$ ). The overall pooled analysis for incidence of complications suggests that non-obese participants are less likely to present any post-surgical complication at the short or long term follow-ups (OR: 0.54; 95% CI: 0.43 to 0.69;  $p=0.000$  and OR: 0.53; 95% CI: 0.41 to 0.68;  $p=0.000$ , respectively). The results of individual studies not included in the pooled analyses are presented in the table 4 below.

**Figure 5** - Meta-Analysis of studies addressing complications

| Author, year     | BMI: Mean (SD) | Measure    | Results                                                                                                                                                           |
|------------------|----------------|------------|-------------------------------------------------------------------------------------------------------------------------------------------------------------------|
| Ollivier 20012   | 25.13 (3.14)*  | HHS / HOOS | At long term high impact sports was associated with better HHS ( $p<0.001$ ) after THA.                                                                           |
| Pietschmann 2013 | 28.4 (4.62)*   | OKS        | At long term physical activities were <b>not</b> related to complications ( $p<0.01$ ). Physically active patients had less pain and better OKS scores after UKA. |
| Poortinga 2014   | 28.7 (4.9)     | WOMAC      | At long term physical activity was <b>not</b> associated with WOMAC score ( $p>0.05$ ) after THA or TKA.                                                          |
| Sechriest 2007   | 28.1 (8.3)     | UCLA       | At long term increased BMI was <b>not</b> correlated to UCLA physical activity score ( $R=-0.07$ ; $p=0.67$ ) after TKA.                                          |

**Table 4:** Results of individual studies investigating the association between obesity and post-surgical complications.

BMI – Body Mass Index; SD – Standard deviation; HHS – Harris Hip Score; HOOS - Hip disability and Osteoarthritis Outcome Score; THA – Total hip arthroplasty; OKS – Oxford Knee Score; UKA - Unicompartimental knee arthroplasty; WOMAC – Western Ontario and McMaster Universities Osteoarthritis Index; TKA – Total knee arthroplasty; UCLA - University of California, Los Angeles activity questionnaire; R –

Correlation coefficient; \*Calculated following guidelines from Cochrane Handbook for Systematic Reviews of Interventions.

### Association between physical activity participation and disability

The association between physical activity and disability was investigated by four studies(72, 74, 75, 78) or 1,033 participants undergoing hip or knee arthroplasty. Included studies have not provided enough data to be pooled. The overall results from these 4 papers suggests that participants who practice more physical activity before the surgeries were more likely to experience less pain after either hip or knee surgery, however the evidence regarding disability scores is still unclear with studies presenting contradictory results. Table 5 below presents the results for the individual studies.

| Author, year     | BMI: Mean (SD) | Measure           | Results                                                                                                                                                                          |
|------------------|----------------|-------------------|----------------------------------------------------------------------------------------------------------------------------------------------------------------------------------|
| Ollivier 20012   | 25.13 (3.14)*  | HHS / HOOS        | At long term high impact sports were associated with better HHS ( $p<0.001$ ) and HOOS ( $p<0.05$ ) after THA.                                                                   |
| Pietschmann 2013 | 28.4 (4.62)*   | OKS / KSS / WOMAC | At long term physical activities were <b>not</b> related to complications. Physically active patients had less pain and better OKS, KSS and WOMAC scores ( $p<0.05$ ) after UKA. |
| Poortinga 2014   | 28.7 (4.9)     | WOMAC             | At long term physical activity was <b>not</b> associated with WOMAC score ( $p>0.05$ ) after THA or TKA.                                                                         |
| Sechriest 2007   | 28.1 (8.3)     | UCLA              | At long term increased BMI was <b>not</b> correlated to UCLA physical activity score ( $R=-0.07$ ; $p=0.67$ ) after TKA.                                                         |

**Table 5** – Individual results on the association between physical activity and pain or disability.

BMI – Body Mass Index; SD – Standard deviation; HHS – Harris Hip Score; HOOS - Hip disability and Osteoarthritis Outcome Score; THA – Total hip arthroplasty; OKS – Oxford Knee Score; KSS – Knee Society Score; WOMAC – Western Ontario and McMaster Universities Osteoarthritis Index; UKA - Unicompartmental knee arthroplasty; TKA – Total knee arthroplasty; UCLA - University of California, Los Angeles activity questionnaire; R – Correlation coefficient; \*Calculated following guidelines from Cochrane Handbook for Systematic Reviews of Interventions.

## Discussion

### *Statement of principal findings*

Our results suggest that non-obese patients experience further reductions in both pain and disability post knee and hip arthroplasty, when compared to obese patients, where obesity has been defined as having a BMI of 30 kg/m<sup>2</sup> or over. These differences seemed to be more accentuated for knee pain outcomes following arthroplasty, than for hip pain or disability outcomes. They also experience significantly less post-surgical complications, including dislocation, DVT and infection especially following hip arthroplasty. Our analyses also demonstrate that obesity is a reliable predictor of complications after total hip arthroplasty and total knee arthroplasty, not only short term after the procedure, but also at longer follow-ups. The evidence on physical activity remains unclear due to conflicting results of included studies, especially in terms of disability. The four included cohort studies, however, suggest that physical activity participation is associated with better pain outcomes following surgery.

Our results have also shown that patients experience a favorable course of pain and disability post-surgery, with decreases in symptoms from baseline of approximately 70% at 6 months and 75% at 12 months for pain and 55% at 12 months and 67% at 120 months for disability. The interpretation of the results on the post-surgical course of pain and disability, however, needs to be taken in the context of the inclusion criteria we have used in our review, given we have only included data from cohort studies that have assessed the role of obesity or physical activity participation on surgical outcomes.

### *Strengths and weaknesses in relation to other studies, discussing particularly any differences in results*

Our meta-analysis results regarding the association between obesity and post-surgical complications found that obese patients present higher complication rates than non-obese patients. These results are consistent with the findings of previous systematic reviews of Hofstede,(14) Samson(15) and Liu(16). Our meta-analysis results regarding the association between obesity and post-surgery disability also agreed with the findings of Buirs *et al*(13) and Samson *et al*(15) which found that obesity (defined as having BMI over 30 kg/m<sup>2</sup>), was associated with worst postsurgical functional score. Only one of the existing reviews(16)

1  
2  
3 conducted a meta-analysis of the findings. The study, however, has only focussed on hip  
4 arthroplasty in terms of complications and functional score. Moreover, the authors have  
5 included 15 studies in their analysis, 18 less than our review.(16) Hofstede *et al*(14) have  
6 also conducted a systematic review of the literature on pre-operative predictors of surgical  
7 outcomes after hip replacement in patients with osteoarthritis. Although the authors have  
8 included 35 studies, only 5 investigated the role of obesity on post-surgical pain, disability  
9 and quality of life.(14) No meta-analysis has been performed.  
10  
11  
12  
13  
14  
15

### 16 *Implications for clinicians or policymakers*

17  
18 Our results have a direct impact on clinical practice as patients need to be made aware of  
19 the risk of complications and worse prognosis in terms of pain and disability reduction,  
20 associated with pre-surgical obesity. These results also allude to the importance of  
21 identifying and implementing effective pre-surgical rehabilitation and weight loss  
22 approaches to optimise post-surgical outcomes and minimize harm to the patient. The  
23 importance of weight loss has been highlighted in international clinical guidelines on non-  
24 surgical management of knee osteoarthritis for instance, given the pain and disability  
25 reductions observed following weight loss regimes.(85) Past research also suggests there is  
26 a dose-response relationship between weight loss and clinical outcome improvement. A  
27 recent completer-type analysis of 1,383 participants with knee osteoarthritis showed that a  
28 weight loss of 7.7% of body weight or more is associated with clinically important changes in  
29 pain and disability, as measured using the Knee Injury and Osteoarthritis Outcome Score  
30 (KOOS).(86) This evidence reinforces the importance of pre-surgical weight loss programs  
31 and strategies in order to optimize post-surgical recovery.  
32  
33  
34  
35  
36  
37  
38  
39  
40  
41  
42  
43

### 44 *Strengths and weaknesses of the study*

45  
46 The current review has included 62 cohort studies and a total of 256,481 participants and is  
47 the most comprehensive systematic review on the topic to date. It is also the first review to  
48 use a quantitative approach to synthesize the results of pain, disability and surgical  
49 complications between non-obese and obese participants and consider the physical activity  
50 level of participants who underwent to hip or knee arthroplasty due to osteoarthritis.  
51  
52

53  
54 Our review has some limitations. The methodological quality of the included studies was in  
55 general low. The most common methodological flaw among included cohorts was not fully  
56  
57  
58

1  
2  
3 describing the sample (n= 43 studies, 69%), followed by not using a representative sample  
4 (n=33 studies, 53%). Moreover, we have observed a substantial variability of follow-up  
5 duration across studies, ranging from 2 weeks to 11 years. We have used a cut-off of 6  
6 months to define short (i.e. < 6 months) or long-term (i.e. ≥ 6 months) follow-ups. We,  
7 however, acknowledge that within each follow-up category there was substantial variation  
8 in the duration of follow-up across studies.  
9  
10  
11  
12

13  
14  
15 There was also great variability in definitions of obesity categories across studies. Although  
16 obesity was assessed using BMI scores in all studies, we defined obesity as a BMI score of 30  
17 kg/m<sup>2</sup> or more, different categories have been used to classify participants. For instance,  
18 whereas some studies have used only two obesity groups (i.e. obese or non-obese), others  
19 use several categories including underweight, normal or overweight, obese and morbidly  
20 obese. These needed to be combined for our pooled analyses. We also acknowledge that  
21 the mean physical activity load reported by the included studies varied substantially, ranging  
22 from low to high frequency of participation in low and high impact activities and this  
23 between-study heterogeneity needs to be taken into consideration when interpreting the  
24 results.  
25  
26  
27  
28  
29  
30  
31  
32  
33

### 34 **Conclusion**

35 Our results have shown that obese patients undergoing hip or knee arthroplasty due to  
36 osteoarthritis have worse outcomes in terms of pain and complications when compared to  
37 non-obese patients, with differences more accentuated for patients with knee  
38 osteoarthritis. Likewise, obese patients will have worse surgical outcomes in terms of  
39 disability, but only at long-term follow-ups. It is still unclear whether pre-surgical physical  
40 activity participation has an impact on surgical outcomes. However, we acknowledge that  
41 the health benefits of physical activity participation for patients with knee and hip  
42 osteoarthritis are multiple and reach beyond those considered in this review.  
43  
44  
45  
46  
47  
48  
49  
50  
51  
52  
53  
54  
55  
56  
57  
58  
59  
60



1  
2  
3 **Contributors:** DP, GCM, PHF, FB and MF were involved in the conception and design of the  
4 review. DP, GCM and MF developed the search strategy and performed study selection. DP  
5 and GCM extracted data from included studies. DP and MLF were involved in the data  
6 analysis. DP, GCM, PHF, FB and MF were involved in the interpretation and discussion of  
7 results. DP drafted the manuscript, and GCM, PHF, FB and MF contributed to the drafting of  
8 the review. GCM, PHF, FB and MF revised it critically for important intellectual content. All  
9 authors approved the final version of the article. All authors had access to all of the data in  
10 the study and can take responsibility for the integrity of the data and the accuracy of the  
11 data analysis.  
12  
13  
14  
15  
16  
17  
18  
19

20 **Funding:** This research received no specific grant from any funding agency in the public,  
21 commercial, or not-for-profit sectors. DP is a PhD student and holds the Science Without  
22 Borders Scholarship from the Brazilian Government. This work was carried out with CNPq  
23 support, National Council for Scientific and Technological Development – Brazil. MF holds a  
24 Sydney Medical Foundation Fellowship.  
25  
26  
27  
28  
29

30 **Ethical approval:** Not required.  
31  
32  
33

34 **Data sharing:** No additional data available.  
35  
36

37 **Transparency:** The lead author (Daniel Pozzobon) affirms that the manuscript is an honest,  
38 accurate, and transparent account of the study being reported; no important aspects of the  
39 study have been omitted.  
40  
41  
42  
43  
44  
45  
46  
47  
48  
49  
50  
51  
52  
53  
54  
55  
56  
57  
58  
59  
60

## References

1. Neogi T. The epidemiology and impact of pain in osteoarthritis. *Osteoarthritis and Cartilage*. 2013;21(9):1145-53.
2. Flegal KM, Carroll MDO, Cynthia L. Curtin, Lester R. Prevalence and Trends in Obesity Among US Adults, 1999-2008. *Journal of American Medical Association*. 2010;303(3).
3. Sharif B, Kopec J, Bansback N, Rahman MM, Flanagan WM, Wong H, et al. Projecting the direct cost burden of osteoarthritis in Canada using a microsimulation model. *Osteoarthritis and Cartilage*. 2015;23(10):1654-63.
4. Chen A, Gupte C, Akhtar K, Smith P, Cobb J. The Global Economic Cost of Osteoarthritis: How the UK Compares. *Arthritis*. 2012;2012:6.
5. Wood AM, Brock TM, Heil K, Holmes R, Weusten A. A Review on the Management of Hip and Knee Osteoarthritis. *International Journal of Chronic Diseases*. 2013;2013:10.
6. Katz JN, Earp BE, Gomoll AH. Surgical Management of Osteoarthritis. *Arthritis care & research*. 2010;62(9):1220-8.
7. Johnson VL, Hunter DJ. The epidemiology of osteoarthritis. *Best Practice & Research Clinical Rheumatology*. 2014;28(1):5-15.
8. Lee I-M, Shiroma EL, F. Puska, P. Blair, SN. Katzmarzyk, PT. Effect of physical inactivity on major non-communicable diseases worldwide: an analysis of burden of disease and life expectancy. *The Lancet*. 2012;380:29.
9. Zeni JA, Snyder-Mackler L. Most patients gain weight in the 2 years after total knee arthroplasty: Comparison to a healthy control group. *Osteoarthritis and Cartilage*. 2010;18(4):510-4.
10. Núñez M, Lozano L, Núñez E, Segur JM, Sastre S, Maculé F, et al. Total knee replacement and health-related quality of life: Factors influencing long-term outcomes. *Arthritis & Rheumatism: Arthritis Care & Research*. 2009;61(8):1062-9.
11. Amin AK, Sales JD, Brenkel IJ. Obesity and total knee and hip replacement. *Current Orthopaedics*. 2006;20(3):216-21.
12. Wagenmakers R, Stevens M, Groothoff JW, Zijlstra W, Bulstra SK, van Beveren J, et al. Physical Activity Behavior of Patients 1 Year After Primary Total Hip Arthroplasty: A Prospective Multicenter Cohort Study. *Physical Therapy*. 2011;91(3):373-80.
13. Buirs LD, Van Beers LW, Scholtes VA, Pastoors T, Sprague S, Poolman RW. Predictors of physical functioning after total hip arthroplasty: a systematic review. *BMJ Open*. 2016;6(9):e010725.
14. Hofstede SN, Gademan MGJ, Vliet Vlieland TPM, Nelissen RGHH, Marang-van de Mheen PJ. Preoperative predictors for outcomes after total hip replacement in patients with osteoarthritis: a systematic review. *BMC Musculoskeletal Disorders*. 2016;17(1):212.
15. Samson AJ, Mercer GE, Campbell DG. Total knee replacement in the morbidly obese: a literature review. *ANZ J Surg*. 2010;80(9):595-9.
16. Liu W, Wahafu T, Cheng M, Cheng T, Zhang Y, Zhang X. The influence of obesity on primary total hip arthroplasty outcomes: A meta-analysis of prospective cohort studies. *Orthopaedics & Traumatology: Surgery & Research*. 2015;101(3):289-96.
17. Liberati A, Altman DG, Tetzlaff J, Mulrow C, Gøtzsche PC, Ioannidis JPA, et al. The PRISMA statement for reporting systematic reviews and meta-analyses of studies that evaluate healthcare interventions: explanation and elaboration. *The BMJ*. 2009;339:b2700.
18. Higgins J, Green S, (editors). *Cochrane Handbook for Systematic Reviews of Interventions* Version 5.1.0 [updated March 2011]. The Cochrane Collaboration; 2011. Available from: <http://handbook.cochrane.org>.
19. Altman DG. Systematic reviews of evaluations of prognostic variables. *Bmj*. 2001;323(7306):224-8.
20. von Elm E, Altman DG, Egger M, Pocock SJ, Gøtzsche PC, Vandenbroucke JP. The Strengthening the Reporting of Observational Studies in Epidemiology (STROBE) statement: guidelines for reporting observational studies. *Epidemiology*. 2007;18(6):800-4.

21. Sorensen C, Friis-Hasche E, Haghfelt T, Bech P. Postmyocardial infarction mortality in relation to depression: a systematic critical review. *Psychotherapy & Psychosomatics*. 2005;74(2):12.
22. Royston P, Sauerbrei W. Fractional Polynomials for One Variable. *Multivariable Model-Building*: John Wiley & Sons, Ltd; 2008. p. 71-98.
23. AbdelSalam H, Restrepo C, Tarity TD, Sangster W, Parvizi J. Predictors of Intensive Care Unit Admission After Total Joint Arthroplasty. *Journal of Arthroplasty*. 2012;27(5):720-5.
24. Amin AK, Clayton RA, Patton JT, Gaston M, Cook RE, Brenkel IJ. Total knee replacement in morbidly obese patients. Results of a prospective, matched study. *Journal of Bone & Joint Surgery, British Volume*. 2006 B;88B(10):1321-6.
25. Amin AK, Patton JT, Cook RE, Brenkel IJ. Does obesity influence the clinical outcome at five years following total knee replacement for osteoarthritis? *Journal of Bone & Joint Surgery, British Volume*. 2006;88B(3):335-40.
26. Andrew JG, Palan J, Kurup HV, Gibson P, Murray DW, Beard DJ. Obesity in total hip replacement. *Journal of Bone & Joint Surgery, British Volume*. 2008;90B(4):424-9.
27. Azodi OS, Adami J, Lindstroem D, Eriksson KO, Wladis A, Bellocco R. High body mass index is associated with increased risk of implant dislocation following primary total hip replacement - 2,106 patients followed for up to 8 years. *Acta Orthopaedica*. 2008;79(1):141-7.
28. Azodi OS, Bellocco R, Eriksson K, Adami J. The impact of tobacco use and body mass index on the length of stay in hospital and the risk of post-operative complications among patients undergoing total hip replacement. *Journal of Bone and Joint Surgery-British Volume*. 2006;88B(10):1316-20.
29. Baker P, Petheram T, Jameson S, Reed M, Gregg P, Deehan D. The association between body mass index and the outcomes of total knee arthroplasty. *Journal of Bone & Joint Surgery, American Volume*. 2012;94(16):1501-8.
30. Belmont PJ, Jr., Goodman GP, Hamilton W, Waterman BR, Bader JO, Schoenfeld AJ. Morbidity and Mortality in the Thirty-Day Period Following Total Hip Arthroplasty: Risk Factors and Incidence. *Journal of Arthroplasty*. 2014 A;29(10):2025-30.
31. Belmont PJ, Jr., Goodman GP, Waterman BR, Bader JO, Schoenfeld AJ. Thirty-Day Postoperative Complications and Mortality Following Total Knee Arthroplasty. *Journal of Bone and Joint Surgery-American Volume*. 2014 B;96A(1):20-6.
32. Bozic KJ, Lau E, Kurtz S, Ong K, Berry DJ. Patient-related Risk Factors for Postoperative Mortality and Periprosthetic Joint Infection in Medicare Patients Undergoing TKA. *Clinical Orthopaedics and Related Research*. 2012 B;470(1):130-7.
33. Bozic KJ, Lau E, Kurtz S, Ong K, Rubash H, Vail TP, et al. Patient-related risk factors for periprosthetic joint infection and postoperative mortality following total hip arthroplasty in medicare patients. *Journal of Bone & Joint Surgery, American Volume*. 2012 A;94(9):794-800.
34. Chee YH, Teoh KH, Sabnis BM, Ballantyne JA, Brenkel IJ. Total hip replacement in morbidly obese patients with osteoarthritis: RESULTS OF A PROSPECTIVELY MATCHED STUDY. *Journal of Bone & Joint Surgery, British Volume*. 2010;92(8):1066-71.
35. Chesney D, Sales J, Elton R, Brenkel IJ. Infection After Knee Arthroplasty. A Prospective Study of 1509 Cases. *Journal of Arthroplasty*. 2008;23(3):355-9.
36. Collins RA, Walmsley PJ, Amin AK, Brenkel IJ, Clayton RAE. Does obesity influence clinical outcome at nine years following total knee replacement? *Journal of Bone and Joint Surgery - Series B*. 2012;94 B(10):1351-5.
37. Davis AM, Perruccio AV, Ibrahim S, Hogg-Johnson S, Wong R, Streiner DL, et al. The trajectory of recovery and the inter-relationships of symptoms, activity and participation in the first year following total hip and knee replacement. *Osteoarthritis and Cartilage*. 2011;19(12):1413-21.
38. Dewan A, Bertolusso R, Karastinos A, Conditt M, Noble PC, Parsley BS. Implant Durability and Knee Function After Total Knee Arthroplasty in the Morbidly Obese Patient. *Journal of Arthroplasty*. 2009;24(6 SUPPL.):89-94.e3.

- 1
- 2
- 3 39. Dowsey MM, Liew D, Stoney JD, Choong PF. The impact of obesity on weight change and
- 4 outcomes at 12 months in patients undergoing total hip arthroplasty. *Med J Aust.* 2010;193(1):17-
- 5 21.
- 6 40. Font-Vizcarra L, Tornero E, Bori G, Bosch J, Mensa J, Soriano A. Relationship between
- 7 intraoperative cultures during hip arthroplasty, obesity, and the risk of early prosthetic joint
- 8 infection: A prospective study of 428 patients. *International Journal of Artificial Organs.*
- 9 2011;34(9):870-5.
- 10 41. Friedman RJ, Hess S, Berkowitz SD, Homering M. Complication Rates After Hip or Knee
- 11 Arthroplasty in Morbidly Obese Patients. *Clinical Orthopaedics and Related Research.*
- 12 2013;471(10):3358-66.
- 13 42. Gandhi R, Razak F, Davey JR, Mahomed NN. Metabolic syndrome and the functional
- 14 outcomes of hip and knee arthroplasty. *Journal of Rheumatology.* 2010;37(9):1917-22.
- 15 43. Hamoui N, Kantor S, Vince K, Crookes PF. Long-term outcome of total knee replacement:
- 16 Does obesity matter? *Obesity Surgery.* 2006;16(1):35-8.
- 17 44. Heiberg KE, Ekeland A, Bruun-Olsen V, Mengshoel AM. Recovery and prediction of physical
- 18 functioning outcomes during the first year after total hip arthroplasty. *Archives of Physical Medicine*
- 19 *& Rehabilitation.* 2013;94(7):1352-9.
- 20 45. Ibrahim T, Hobson S, Beiri A, Esler CN. No influence of body mass index on early outcome
- 21 following total hip arthroplasty. *International Orthopaedics.* 2005;29(6):359-61.
- 22 46. Jackson MP, Sexton SA, Walter WL, Walter WK, Zicat BA. The impact of obesity on the mid-
- 23 term outcome of cementless total knee replacement. *Journal of Bone & Joint Surgery, British*
- 24 *Volume.* 2009;91(8):1044-8.
- 25 47. Jameson SS, Mason JM, Baker PN, Elson DW, Deehan DJ, Reed MR. The impact of body mass
- 26 index on patient reported outcome measures (proms) and complications following primary hip
- 27 arthroplasty. *Journal of Arthroplasty.* 2014;29(10):1889-98.
- 28 48. Jansen E, Nevalainen P, Eskelinen A, Huotari K, Kalliovalkama J, Moilanen T. Obesity,
- 29 diabetes, and preoperative hyperglycemia as predictors of periprosthetic joint infection: A single-
- 30 center analysis of 7181 primary hip and knee replacements for osteoarthritis. *Journal of Bone and*
- 31 *Joint Surgery - Series A.* 2012;94(14):e101.1-e.9.
- 32 49. Jansen E, Varonen M, Huhtala H, Lehto MUK, Lumio J, Konttinen YT, et al. Incidence of
- 33 Prosthetic Joint Infections After Primary Knee Arthroplasty. *Journal of Arthroplasty.* 2010;25(1):87-
- 34 92.
- 35 50. Jarvenpaa J, Kettunen J, Kroger H, Miettinen H. Obesity may impair the early outcome of
- 36 total knee arthroplasty. A prospective study of 100 patients. *Scand J Surg.* 2010;99(1):45-9.
- 37 51. Jarvenpaa J, Kettunen J, Soininvaara T, Miettinen H, Kroger H. Obesity has a negative impact
- 38 on clinical outcome after total knee arthroplasty. *Scand J Surg.* 2012;101(3):198-203.
- 39 52. Judge A, Cooper C, Williams S, Dreinhofer K, Dieppe P. Patient-reported outcomes one year
- 40 after primary hip replacement in a European collaborative cohort. *Arthritis Care Res.*
- 41 2010;62(4):480-8.
- 42 53. Kandil A, Werner BC, Gwathmey WF, Browne JA. Obesity, Morbid Obesity and their Related
- 43 Medical Comorbidities are Associated with Increased Complications and Revision Rates after
- 44 Unicompartmental Knee Arthroplasty. *Journal of Arthroplasty.* 2015;30(3):456-60.
- 45 54. Kessler S, Kaefert W. Overweight and obesity: Two predictors for worse early outcome in
- 46 total hip replacement? *Obesity.* 2007;15(11):2840-5.
- 47 55. Kim K-I, Cho K-Y, Jin W, Khurana SS, Bae D-K. Recent Korean Perspective of Deep Vein
- 48 Thrombosis After Total Knee Arthroplasty. *Journal of Arthroplasty.* 2011;26(7):1112-6.
- 49 56. Kort NP, van Raay JJ, van Horn JJ. The Oxford phase III unicompartmental knee replacement
- 50 in patients less than 60 years of age. *Knee Surg Sports Traumatol Arthrosc.* 2007;15(4):356-60.
- 51 57. Ledford CK, Ruberte Thiele RA, Appleton JS, Jr., Butler RJ, Wellman SS, Attarian DE, et al.
- 52 Percent body fat more associated with perioperative risks after total joint arthroplasty than body
- 53 mass index. *Journal of Arthroplasty.* 2014;29(9 Suppl):150-4.
- 54
- 55
- 56
- 57
- 58
- 59
- 60

- 1  
2  
3 58. Liabaud B, Patrick DA, Geller JA. Higher Body Mass Index Leads to Longer Operative Time in  
4 Total Knee Arthroplasty. *Journal of Arthroplasty*. 2013;28(4):563-5.
- 5 59. Liljensøe A, Lauersen JO, Søballe K, Mechlenburg I. Overweight preoperatively impairs  
6 clinical outcome after knee arthroplasty. *Acta Orthopaedica*. 2013;84(4):392-7.
- 7 60. Lüebbeke A, Katz JN, Perneger TV, Hoffmeyer P. Primary and revision hip arthroplasty: 5-  
8 year outcomes and influence of age and comorbidity. *Journal of Rheumatology*. 2007 B;34(2):394-  
9 400.
- 10 61. Luebbeke A, Stern R, Garavaglia G, Zurcher L, Hoffmeyer P. Differences in outcomes of obese  
11 women and men undergoing primary total hip arthroplasty. *Arthritis Rheum-Arthritis Care Res*. 2007  
12 A;57(2):327-34.
- 13 62. Mackie A, Muthumayandi K, Shirley M, Deehan D, Gerrand C. Association between body  
14 mass index change and outcome in the first year after total knee arthroplasty. *Journal of*  
15 *Arthroplasty*. 2015;30(2):206-9.
- 16 63. Madsen AA, Taylor BC, Dimitris C, Hansen DC, Steensen RA, Gaines ST. Safety of bilateral  
17 total knee arthroplasty in morbidly obese patients. *Orthopedics*. 2014;37(3):e252-9.
- 18 64. Maisongrosse P, Lepage B, Cavaignac E, Pailhe R, Reina N, Chiron P, et al. Obesity is no  
19 longer a risk factor for dislocation after total hip arthroplasty with a double-mobility cup.  
20 *International Orthopaedics*. 2014.
- 21 65. McLaughlin JR, Lee KR. The outcome of total hip replacement in obese and non-obese  
22 patients at 10- to 18-years. *Journal of Bone & Joint Surgery, British Volume*. 2006;88B(10):1286-92.
- 23 66. Michalka PK, Khan RJ, Scaddan MC, Haebich S, Chirodian N, Wimhurst JA. The influence of  
24 obesity on early outcomes in primary hip arthroplasty. *Journal of Arthroplasty*. 2012;27(3):391-6.
- 25 67. Murray DW, Pandit H, Weston-Simons JS, Jenkins C, Gill HS, Lombardi AV, et al. Does body  
26 mass index affect the outcome of unicompartmental knee replacement? *Knee*. 2013;20(6):461-5.
- 27 68. Naal FD, Neuerburg C, Salzmann GM, Kriner M, von Knoch F, Preiss S, et al. Association of  
28 body mass index and clinical outcome 2 years after unicompartmental knee arthroplasty. *Arch*  
29 *Orthop Trauma Surg*. 2009;129(4):463-8.
- 30 69. Namba RS, Paxton L, Fithian DC, Stone ML. Obesity and perioperative morbidity in total hip  
31 and total knee arthroplasty patients. *Journal of Arthroplasty*. 2005;20(SUPPL. 3):46-50.
- 32 70. Napier RJ, O'Brien S, Bennett P, Doran E, Sykes A, Murray J, et al. Intra-operative and short  
33 term outcome of total knee arthroplasty in morbidly obese patients. *Knee*. 2014;21(3):784-8.
- 34 71. Naylor JM, Harmer AR, Heard RC. Severe other joint disease and obesity independently  
35 influence recovery after joint replacement surgery: An observational study. *Australian Journal of*  
36 *Physiotherapy*. 2008;54(1):57-64.
- 37 72. Ollivier M, Frey S, Parratte S, Flecher X, Argenson JN. Does impact sport activity influence  
38 total hip arthroplasty durability? *Clin Orthop*. 2012;470(11):3060-6.
- 39 73. Patel AD, Albrizio M. Relationship of body mass index to early complications in knee  
40 replacement surgery. *Arch Orthop Trauma Surg*. 2008;128(1):5-9.
- 41 74. Pietschmann MF, Wohlleb L, Weber P, Schmidutz F, Ficklscherer A, Guelecycuez MF, et al.  
42 Sports activities after medial unicompartmental knee arthroplasty Oxford III-What can we expect?  
43 *International Orthopaedics*. 2013;37(1):31-7.
- 44 75. Poortinga S, Van Den Akker-Scheek I, Bulstra SK, Stewart RE, Stevens M. Preoperative  
45 physical activity level has no relationship to the degree of recovery one year after primary total hip  
46 or knee arthroplasty: A cohort study. *PLoS ONE*. 2014;9(12).
- 47 76. Pulido L, Ghanem E, Joshi A, Purtill JJ, Parvizi J. Periprosthetic joint infection: the incidence,  
48 timing, and predisposing factors. *Clin Orthop*. 2008;466(7):1710-5.
- 49 77. Rajgopal V, Bourne RB, Chesworth BM, MacDonald SJ, McCalden RW, Rorabeck CH. The  
50 impact of morbid obesity on patient outcomes after total knee arthroplasty. *Journal of Arthroplasty*.  
51 2008;23(6):795-800.
- 52  
53  
54  
55  
56  
57  
58  
59  
60

- 1  
2  
3 78. Sechriest VF, II, Kyle RF, Marek DJ, Spates JD, Saleh KJ, Kuskowski M. Activity level in young  
4 patients with primary total hip arthroplasty - A 5-year minimum follow-up. *Journal of Arthroplasty*.  
5 2007;22(1):39-47.
- 6 79. Villalobos PA, Navarro-Espigares JL, Hernandez-Torres E, Martinez-Montes JL, Villalobos M,  
7 Arroyo-Morales M. Body Mass Index as Predictor of Health-Related Quality-of-Life Changes After  
8 Total Hip Arthroplasty: A Cross-Over Study. *Journal of Arthroplasty*. 2013;28(4):666-70.
- 9 80. Vogl M, Wilkesmann R, Lausmann C, Hunger M, Plotz W. The impact of preoperative patient  
10 characteristics on health states after total hip replacement and related satisfaction thresholds: A  
11 cohort study. *Health Qual Life Outcomes*. 2014;12(1).
- 12 81. Wang W, Morrison TA, Geller JA, Yoon RS, Macaulay W. Predicting Short-Term Outcome of  
13 Primary Total Hip Arthroplasty A Prospective Multivariate Regression Analysis of 12 Independent  
14 Factors. *Journal of Arthroplasty*. 2010;25(6):858-64.
- 15 82. Yasunaga H, Tsuchiya K, Matsuyama Y, Ohe K. Analysis of factors affecting operating time,  
16 postoperative complications, and length of stay for total knee arthroplasty: nationwide web-based  
17 survey. *Journal of Orthopaedic Science*. 2009;14(1):10-6.
- 18 83. Zhang Z-j, Kang Y, Zhang Z-q, Yang Z-b, He A-s, Fu M, et al. The influence of body mass index  
19 on life quality and clinical improvement after total hip arthroplasty. *Journal of Orthopaedic Science*.  
20 2012;17(3):219-25.
- 21 84. Dowsey MM, Choong PFM. Obesity is a major risk factor for prosthetic infection after  
22 primary hip arthroplasty. *Clinical Orthopaedics and Related Research*. 2008;466(1):153-8.
- 23 85. McAlindon TE, Bannuru RR, Sullivan MC, Arden NK, Berenbaum F, Bierma-Zeinstra SM, et al.  
24 OARSJ guidelines for the non-surgical management of knee osteoarthritis. *Osteoarthritis and*  
25 *Cartilage*. 2014;22(3):363-88.
- 26 86. Atukorala I, Makovey J, Lawler L, Messier SP, Bennell K, Hunter DJ. Is There a Dose-Response  
27 Relationship Between Weight Loss and Symptom Improvement in Persons With Knee Osteoarthritis?  
28 *Arthritis Care & Research*. 2016;68(8):1106-14.
- 29  
30  
31  
32  
33  
34  
35  
36  
37  
38  
39  
40  
41  
42  
43  
44  
45  
46  
47  
48  
49  
50  
51  
52  
53  
54  
55  
56  
57  
58  
59  
60

**Table 6** - MEDLINE search strategy terms used:

|           |                                                                                                                                                                                                                                         |                  |
|-----------|-----------------------------------------------------------------------------------------------------------------------------------------------------------------------------------------------------------------------------------------|------------------|
| 1         | obesity.mp. or exp Obesity/ or exp Obesity, Abdominal/                                                                                                                                                                                  | 197.941          |
| 2         | Physical Activity.mp. or exp Motor Activity/                                                                                                                                                                                            | 231.947          |
| 3         | sedentar\$.mp.                                                                                                                                                                                                                          | 19.058           |
| 4         | (time adj5 sitting).mp. [mp=title, abstract, original title, name of substance<br>word, subject heading word, keyword heading word, protocol supplementary<br>concept word, rare disease supplementary concept word, unique identifier] | 688              |
| <b>5</b>  | <b>1 or 2 or 3 or 4</b>                                                                                                                                                                                                                 | <b>414.967</b>   |
| 6         | exp Postoperative Complications/ or exp Hip Prosthesis/ or exp Arthroplasty,<br>Replacement, Hip/ or hip arthroplasty.mp. or exp Osteoarthritis, Hip/ or exp<br>Hip Joint/                                                              | 469.282          |
| 7         | knee arthroplasty.mp. or exp Arthroplasty, Replacement, Knee/                                                                                                                                                                           | 17.365           |
| 8         | exp Elective Surgical Procedures/ or elective surgery.mp.                                                                                                                                                                               | 14.058           |
| 9         | osteoarthritis.mp. or exp Osteoarthritis, Hip/ or exp Osteoarthritis/ or exp<br>Osteoarthritis, Knee/                                                                                                                                   | 55.493           |
| 10        | exp Osteonecrosis/ or Osteonecrosis.mp.                                                                                                                                                                                                 | 13.961           |
| 11        | arthroplasty.mp. or exp Arthroplasty, Replacement, Knee/ or exp Arthroplasty,<br>Replacement/ or exp Arthroplasty/ or exp Arthroplasty, Replacement, Hip/                                                                               | 53.979           |
| <b>12</b> | <b>6 or 7 or 8 or 9 or 10 or 11</b>                                                                                                                                                                                                     | <b>546.616</b>   |
| 13        | exp Cohort Studies/ or cohort.mp.                                                                                                                                                                                                       | 1.526.984        |
| 14        | incidence.mp. or exp Incidence/                                                                                                                                                                                                         | 587.274          |
| 15        | exp Follow-Up Studies/ or follow-up.mp.                                                                                                                                                                                                 | 912.064          |
| 16        | prognosis.mp. or exp Prognosis/                                                                                                                                                                                                         | 1.273.869        |
| 17        | exp Prognosis/ or predictors.mp.                                                                                                                                                                                                        | 1.258.014        |
| 18        | exp Time Factors/ or course.mp.                                                                                                                                                                                                         | 1.403.404        |
| 19        | exp Survival Analysis/ or exp Survival/ or exp Survival Rate/ or survival.mp.                                                                                                                                                           | 843.771          |
| 20        | logistic.mp.                                                                                                                                                                                                                            | 198.801          |
| 21        | cox.mp.                                                                                                                                                                                                                                 | 84.820           |
| 22        | life table.mp. or exp Life Tables/                                                                                                                                                                                                      | 18.098           |
| 23        | log rank.mp. or exp Follow-Up Studies/                                                                                                                                                                                                  | 533.280          |
| <b>24</b> | <b>13 or 14 or 15 or 16 or 17 or 18 or 19 or 20 or 21 or 22 or 23</b>                                                                                                                                                                   | <b>4.460.132</b> |
| 25        | Animals/                                                                                                                                                                                                                                | 5.495.334        |
| 26        | exp Editorial/ or editorial.mp.                                                                                                                                                                                                         | 376.114          |
| 27        | case report.mp. or exp Case Reports/                                                                                                                                                                                                    | 1.754.352        |
| 28        | letter.mp. or exp Letter/                                                                                                                                                                                                               | 895.420          |
| 29        | 25 or 26 or 27 or 28                                                                                                                                                                                                                    | 8.184.015        |
| <b>30</b> | <b>5 and 12 and 24</b>                                                                                                                                                                                                                  | <b>7.601</b>     |
| <b>31</b> | <b>30 not 29</b>                                                                                                                                                                                                                        | <b>6.869</b>     |

**Fig 2** – Data for hip (A) and knee (B) disability scores and hip (C) and knee (D) pain scores over time.

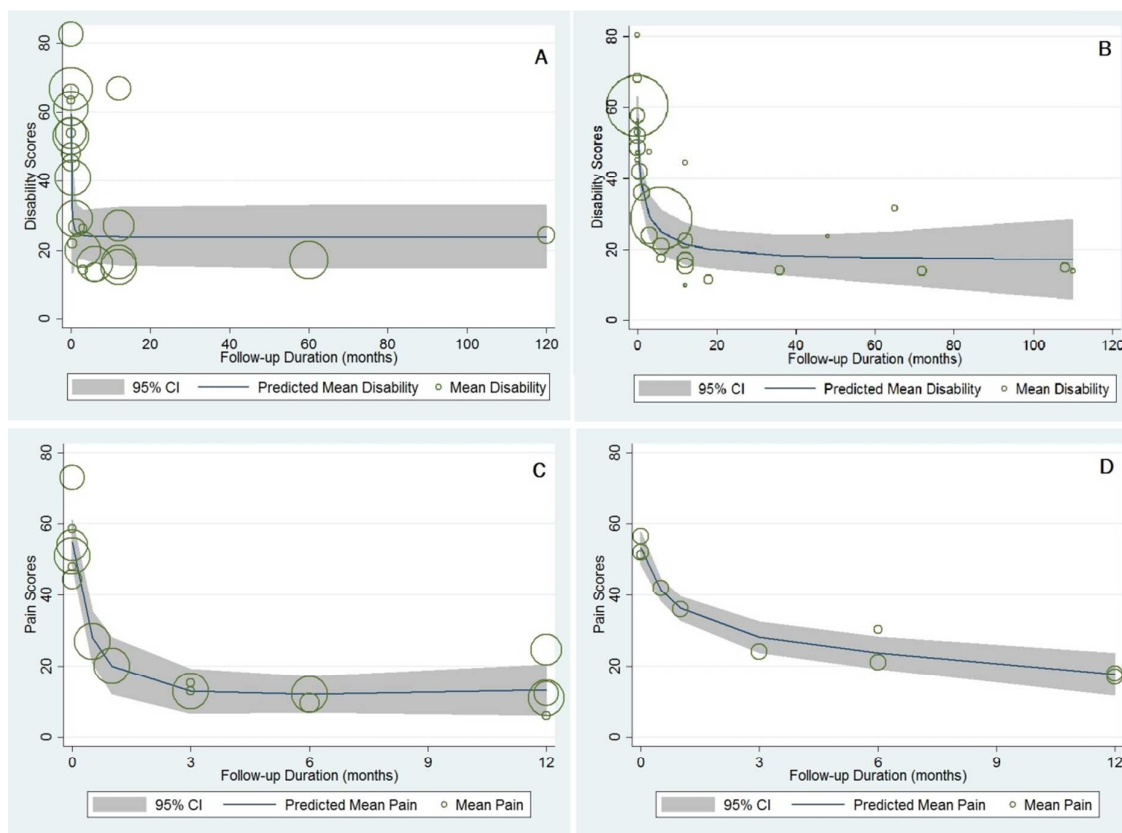

view only



**Fig 3** – Pooled standardised mean difference in pain at short and long term post-surgery between obese and non-obese patients.

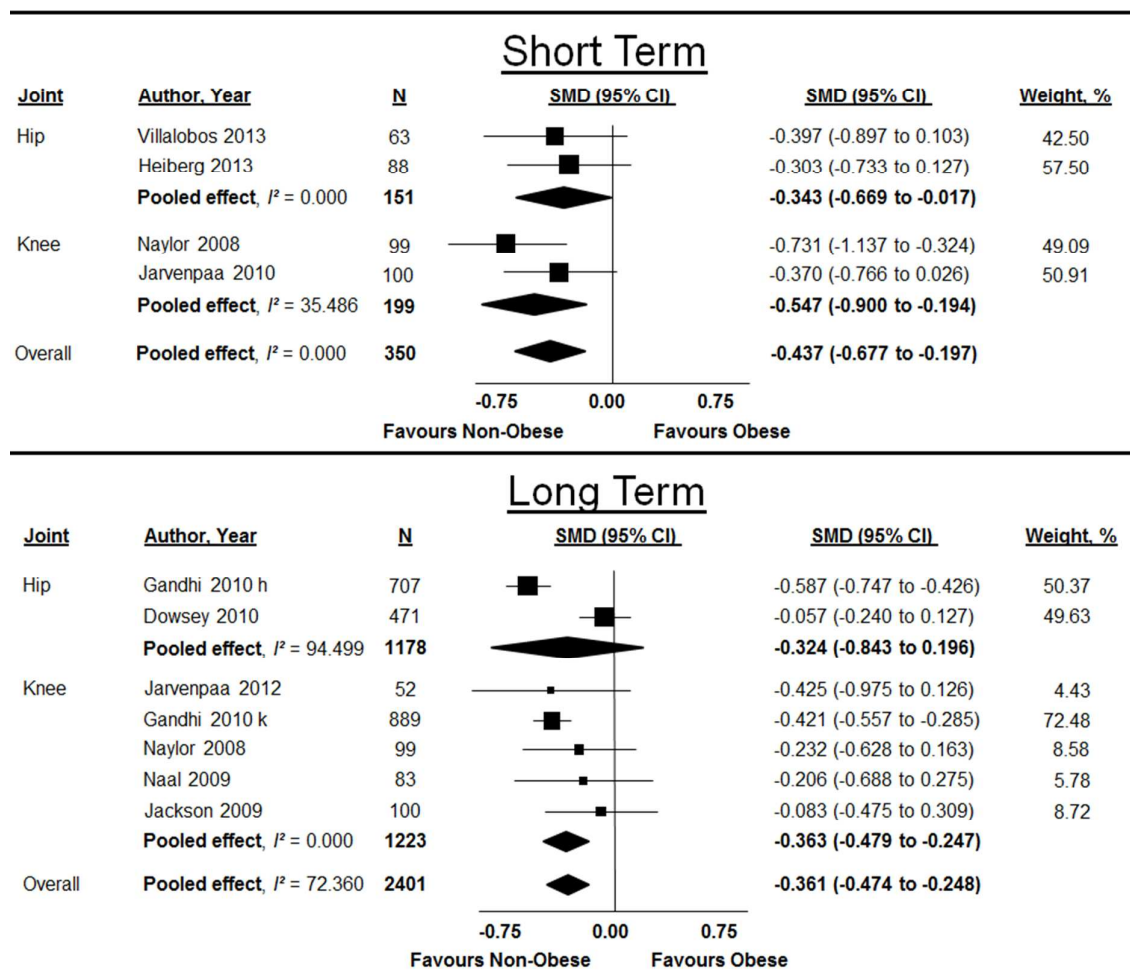

**Fig 4 – Pooled standardised mean difference in disability at short and long term post-surgery between obese and non-obese patients.**

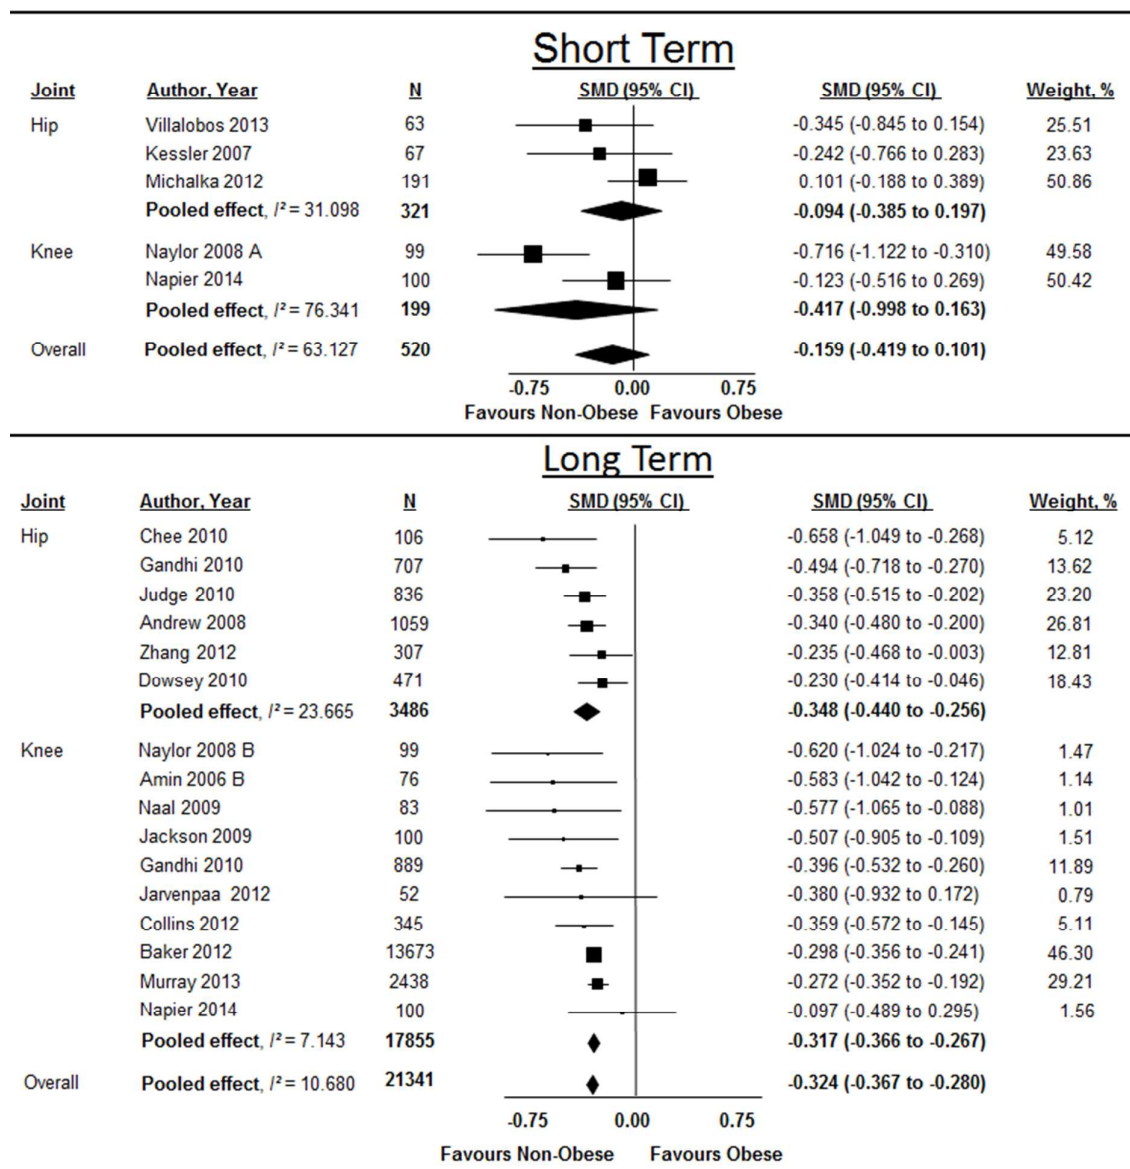

**Fig 5** – Pooled association between complications and obesity at short term (A) and long term (B) follow-ups.

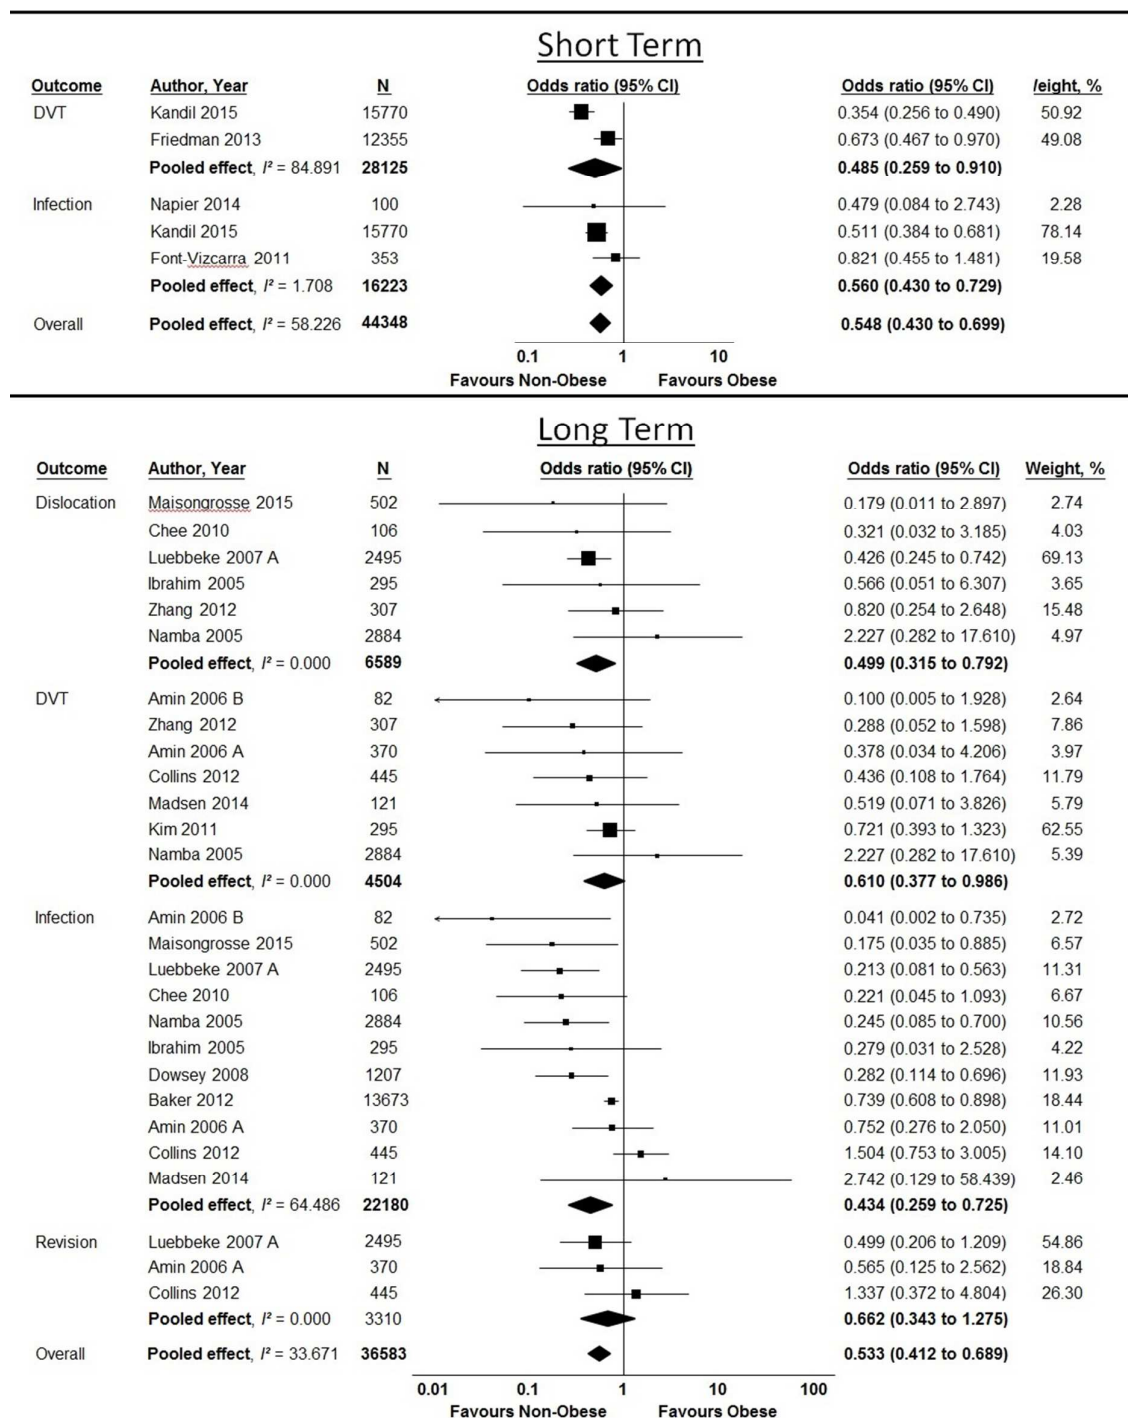

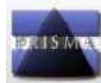

# PRISMA 2009 Checklist

| Section/topic                      | #  | Checklist item                                                                                                                                                                                                                                                                                              | Reported on page # |
|------------------------------------|----|-------------------------------------------------------------------------------------------------------------------------------------------------------------------------------------------------------------------------------------------------------------------------------------------------------------|--------------------|
| <b>TITLE</b>                       |    |                                                                                                                                                                                                                                                                                                             |                    |
| Title                              | 1  | Identify the report as a systematic review, meta-analysis, or both.                                                                                                                                                                                                                                         | 1                  |
| <b>ABSTRACT</b>                    |    |                                                                                                                                                                                                                                                                                                             |                    |
| Structured summary                 | 2  | Provide a structured summary including, as applicable: background; objectives; data sources; study eligibility criteria, participants, and interventions; study appraisal and synthesis methods; results; limitations; conclusions and implications of key findings; systematic review registration number. | 2                  |
| <b>INTRODUCTION</b>                |    |                                                                                                                                                                                                                                                                                                             |                    |
| Rationale                          | 3  | Describe the rationale for the review in the context of what is already known.                                                                                                                                                                                                                              | 4                  |
| Objectives                         | 4  | Provide an explicit statement of questions being addressed with reference to participants, interventions, comparisons, outcomes, and study design (PICOS).                                                                                                                                                  | 5                  |
| <b>METHODS</b>                     |    |                                                                                                                                                                                                                                                                                                             |                    |
| Protocol and registration          | 5  | Indicate if a review protocol exists, if and where it can be accessed (e.g., Web address), and, if available, provide registration information including registration number.                                                                                                                               | 5                  |
| Eligibility criteria               | 6  | Specify study characteristics (e.g., PICOS, length of follow-up) and report characteristics (e.g., years considered, language, publication status) used as criteria for eligibility, giving rationale.                                                                                                      | 6                  |
| Information sources                | 7  | Describe all information sources (e.g., databases with dates of coverage, contact with study authors to identify additional studies) in the search and date last searched.                                                                                                                                  | 5                  |
| Search                             | 8  | Present full electronic search strategy for at least one database, including any limits used, such that it could be repeated.                                                                                                                                                                               |                    |
| Study selection                    | 9  | State the process for selecting studies (i.e., screening, eligibility, included in systematic review, and, if applicable, included in the meta-analysis).                                                                                                                                                   | 8                  |
| Data collection process            | 10 | Describe method of data extraction from reports (e.g., piloted forms, independently, in duplicate) and any processes for obtaining and confirming data from investigators.                                                                                                                                  | 6                  |
| Data items                         | 11 | List and define all variables for which data were sought (e.g., PICOS, funding sources) and any assumptions and simplifications made.                                                                                                                                                                       | 7-8                |
| Risk of bias in individual studies | 12 | Describe methods used for assessing risk of bias of individual studies (including specification of whether this was done at the study or outcome level), and how this information is to be used in any data synthesis.                                                                                      | 7                  |
| Summary measures                   | 13 | State the principal summary measures (e.g., risk ratio, difference in means).                                                                                                                                                                                                                               | 8                  |
| Synthesis of results               | 14 | Describe the methods of handling data and combining results of studies, if done, including measures of consistency (e.g., $I^2$ ) for each meta-analysis.                                                                                                                                                   | 8                  |

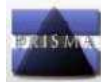

# PRISMA 2009 Checklist

Page 1 of 2

| Section/topic                 | #  | Checklist item                                                                                                                                                                                           | Reported on page # |
|-------------------------------|----|----------------------------------------------------------------------------------------------------------------------------------------------------------------------------------------------------------|--------------------|
| Risk of bias across studies   | 15 | Specify any assessment of risk of bias that may affect the cumulative evidence (e.g., publication bias, selective reporting within studies).                                                             | 7                  |
| Additional analyses           | 16 | Describe methods of additional analyses (e.g., sensitivity or subgroup analyses, meta-regression), if done, indicating which were pre-specified.                                                         | 8                  |
| <b>RESULTS</b>                |    |                                                                                                                                                                                                          |                    |
| Study selection               | 17 | Give numbers of studies screened, assessed for eligibility, and included in the review, with reasons for exclusions at each stage, ideally with a flow diagram.                                          | 8                  |
| Study characteristics         | 18 | For each study, present characteristics for which data were extracted (e.g., study size, PICOS, follow-up period) and provide the citations.                                                             | 10                 |
| Risk of bias within studies   | 19 | Present data on risk of bias of each study and, if available, any outcome level assessment (see item 12).                                                                                                | 10                 |
| Results of individual studies | 20 | For all outcomes considered (benefits or harms), present, for each study: (a) simple summary data for each intervention group (b) effect estimates and confidence intervals, ideally with a forest plot. | 14                 |
| Synthesis of results          | 21 | Present results of each meta-analysis done, including confidence intervals and measures of consistency.                                                                                                  | 14-19              |
| Risk of bias across studies   | 22 | Present results of any assessment of risk of bias across studies (see Item 15).                                                                                                                          | 10-13              |
| Additional analysis           | 23 | Give results of additional analyses, if done (e.g., sensitivity or subgroup analyses, meta-regression [see Item 16]).                                                                                    | 14                 |
| <b>DISCUSSION</b>             |    |                                                                                                                                                                                                          |                    |
| Summary of evidence           | 24 | Summarize the main findings including the strength of evidence for each main outcome; consider their relevance to key groups (e.g., healthcare providers, users, and policy makers).                     | 20                 |
| Limitations                   | 25 | Discuss limitations at study and outcome level (e.g., risk of bias), and at review-level (e.g., incomplete retrieval of identified research, reporting bias).                                            | 21                 |
| Conclusions                   | 26 | Provide a general interpretation of the results in the context of other evidence, and implications for future research.                                                                                  | 22                 |
| <b>FUNDING</b>                |    |                                                                                                                                                                                                          |                    |
| Funding                       | 27 | Describe sources of funding for the systematic review and other support (e.g., supply of data); role of funders for the systematic review.                                                               | 23                 |

From: Moher D, Liberati A, Tetzlaff J, Altman DG, The PRISMA Group (2009). Preferred Reporting Items for Systematic Reviews and Meta-Analyses: The PRISMA Statement. PLoS Med 6(7): e1000097. doi:10.1371/journal.pmed1000097

For more information, visit: [www.prisma-statement.org](http://www.prisma-statement.org).

Page 2 of 2

For peer review only - <http://bmjopen.bmj.com/site/about/guidelines.xhtml>

# BMJ Open

## Can obesity and physical activity predict outcomes of elective knee or hip surgery due to osteoarthritis? – A meta-analysis of cohort studies.

|                                 |                                                                                                                                                                                                                                                                                                                                                                                              |
|---------------------------------|----------------------------------------------------------------------------------------------------------------------------------------------------------------------------------------------------------------------------------------------------------------------------------------------------------------------------------------------------------------------------------------------|
| Journal:                        | <i>BMJ Open</i>                                                                                                                                                                                                                                                                                                                                                                              |
| Manuscript ID                   | bmjopen-2017-017689.R1                                                                                                                                                                                                                                                                                                                                                                       |
| Article Type:                   | Research                                                                                                                                                                                                                                                                                                                                                                                     |
| Date Submitted by the Author:   | 27-Sep-2017                                                                                                                                                                                                                                                                                                                                                                                  |
| Complete List of Authors:       | Pozzobon, Daniel; University of Sydney - Camperdown and Darlington Campus, Rheumatology<br>Ferreira, Paulo; University of Sydney, Faculty of Health Science<br>Blyth, Fiona; University of Sydney, Concord Hospital<br>Machado, Gustavo; University of Sydney - Camperdown and Darlington Campus<br>Ferreira, Manuela; University of Sydney - Camperdown and Darlington Campus, Rheumatology |
| <b>Primary Subject Heading</b>: | Rheumatology                                                                                                                                                                                                                                                                                                                                                                                 |
| Secondary Subject Heading:      | Public health, Epidemiology, Surgery                                                                                                                                                                                                                                                                                                                                                         |
| Keywords:                       | RHEUMATOLOGY, Hip < ORTHOPAEDIC & TRAUMA SURGERY, Knee < ORTHOPAEDIC & TRAUMA SURGERY, Surgical pathology < PATHOLOGY                                                                                                                                                                                                                                                                        |
|                                 |                                                                                                                                                                                                                                                                                                                                                                                              |

SCHOLARONE™  
Manuscripts

only

1  
2  
3 **Can obesity and physical activity predict outcomes of elective knee**  
4 **or hip surgery due to osteoarthritis? – A meta-analysis of cohort**  
5 **studies.**  
6  
7  
8  
9

10  
11 Daniel Pozzobon<sup>1</sup>, Paulo H Ferreira<sup>2</sup>, Fiona M Blyth<sup>3</sup>, Gustavo C Machado<sup>4</sup>, Manuela L  
12 Ferreira<sup>1</sup>  
13  
14

15  
16 <sup>1</sup> Institute of Bone and Joint Research, The Kolling Institute, Sydney Medical School,  
17 University of Sydney, Sydney, NSW  
18

19  
20 <sup>2</sup> Discipline of Physiotherapy, Faculty of Health Sciences, University of Sydney, Sydney, NSW  
21

22 <sup>3</sup> Concord Clinical School, University of Sydney, Sydney, NSW  
23

24 <sup>4</sup> School of Public Health, The University of Sydney, Sydney, NSW  
25  
26  
27

28  
29 Correspondence to: D. Pozzobon, Royal North Shore Hospital, Department of  
30 Rheumatology, 7C – Clinical Administration, St Leonards, NSW 2065, Australia  
31 (dpoz5597@uni.sydney.edu.au, ph 0404 967 756).  
32  
33  
34

35  
36 Word count: 3,799.  
37  
38  
39  
40  
41  
42  
43  
44  
45  
46  
47  
48  
49  
50  
51  
52  
53  
54  
55  
56  
57  
58  
59  
60

## Abstract

**Objective:** The aim of this study was to systematically review the literature to identify whether obesity or the regular practice of physical activity are predictors of clinical outcomes in patients undergoing elective hip and knee arthroplasty due to osteoarthritis.

**Design:** Systematic review and meta-analysis.

**Data Source and eligibility criteria:** A systematic search was performed on the Medline, CINAHL, EMBASE, and Web of Science electronic databases. Longitudinal cohort studies were included in the review. To be included, studies needed to have assessed the association between obesity or physical activity participation at baseline and clinical outcomes (i.e. pain, disability, and adverse events) following hip or knee arthroplasty.

**Data extraction:** Two independent reviewers extracted data on pain, disability, quality of life, obesity, physical activity and any post-surgical complications.

**Results:** 63 full papers were included in this systematic review. From these, 31 were included in the meta-analyses. Our meta-analysis showed that non-obese participants tended to suffer less pain at both short (SMD -0.43; 95%CI: -0.67 to -0.19;  $p<0.001$ ) and long term (SMD -0.36; 95%CI: -0.47 to -0.24;  $p<0.001$ ), less disability at long term (SMD -0.32; 95%CI: -0.36 to -0.28;  $p<0.001$ ) and report fewer post-surgical complications at short (OR: 0.48; 95% CI: 0.25 to 0.91;  $p<0.001$ ) and long term (OR: 0.55; 95% CI: 0.41 to 0.74;  $p<0.001$ ) and less post-surgical infections after hip arthroplasty (OR: 0.33; 95% CI: 0.18 to 0.59;  $p<0.001$ ), and particularly when compared to morbidly obese participants after knee arthroplasty (OR: 0.42; 95% CI: 0.23 to 0.78;  $p=0.006$ ).

**Conclusions:** Pre-surgical obesity is associated with worse clinical outcomes of hip or knee arthroplasty in terms of pain, disability, and complications in patients with osteoarthritis. No impact of physical activity participation has been observed.

**Systematic review registration:** PROSPERO registration CRD42016032711.

**Keywords:** Physical activity, obesity, arthroplasty, osteoarthritis, knee, hip, meta-analysis.



**Strengths and limitations of this study**

- The current review is the most comprehensive systematic review on the topic to date.
- The current review is the first review to use a quantitative approach to synthesize the results of pain, disability and surgical complications between non-obese and obese participants who underwent hip or knee arthroplasty due to osteoarthritis.
- The methodological quality of the included studies was in general poor.
- There was a substantial variability of follow-up duration across studies, ranging from 2 weeks to 11 years.

## Introduction

Musculoskeletal pain, including pain from knee and hip osteoarthritis, is the leading cause of physical disability in the world and responsible for an increasing burden to patients and society.(1) This problem will increase over time, as the world population ages and physical disability resulting from declining health becomes increasingly prevalent.(2) The global health care expenditure for knee and hip osteoarthritis is substantial, and most of these costs are incurred by surgical management and associated hospital care.(3) For instance, in the UK the direct costs of osteoarthritis were estimated at more than £1 billion in 2010, of which £850 million was spent just on surgical procedures.(4)

Although management of the early stages of this condition consists of a combination of nonpharmacological and pharmacological therapies (e.g. anti-inflammatory and analgesic drugs), surgery has become the most common treatment option for severe cases, especially when nonsurgical therapies fail to provide sufficient pain relief.(5) Osteotomy, mosaicplasty, and arthroplasty are some of the existing types of surgery used to manage osteoarthritis of the hip and knee; with total or partial arthroplasty being the most commonly recommended.(6)

There are multiple risk factors for the development of knee OA. Among the most common of these are increased body weight and muscle weakness; often attributed to a sedentary lifestyle.(7) Obesity and sedentary lifestyle behaviour have also been associated with serious health conditions such as: coronary heart disease, type 2 diabetes, breast and colon cancers, and decreased life expectancy.(8) Although there is evidence for the role of obesity and physical inactivity in health conditions and quality of life in general,(9, 10) the actual impact of these factors, together or in isolation, on the outcomes of elective surgery of the knee and hip is still controversial.(11, 12) Although previous attempts to systematically review the literature have been made, these studies(13-15) have either failed to perform a quantitative summary of the evidence (i.e. meta-analysis), have excluded patients undergoing knee arthroplasty,(16) or have excluded pain outcomes.(13) No meta-analyses have been performed considering obesity and physical activity as predictors of surgical outcomes in terms of pain, disability, quality of life and complications after hip or knee arthroplasty for end stage osteoarthritis.

1  
2  
3 Identifying whether obesity and physical activity participation predict surgical outcomes in  
4 patients with knee and hip osteoarthritis will inform clinical practice in terms of prognosis  
5 and safety of an increasingly prevalent treatment approach. We have conducted a meta-  
6 analysis of cohort studies aiming to quantify the role of obesity and physical activity  
7 participation as predictors of clinical outcomes in terms of pain, disability, quality of life, and  
8 post-surgical complications. This review and meta-analysis focused on patients with knee  
9 and hip osteoarthritis undergoing hip or knee arthroplasty.  
10  
11  
12  
13  
14  
15

## 16 **Methods**

### 17 *Data sources and searches*

18 We conducted a systematic review following the PRISMA statement.<sup>(17)</sup> This review was  
19 prospectively registered on PROSPERO, registration number CRD42016032711. A systematic  
20 electronic search was performed in the following databases from inception to January 2017:  
21 MEDLINE, EMBASE, CINAHL, and Web of Science. We used a combination of relevant  
22 keywords to construct the search strategy including obesity, physical activity, knee  
23 osteoarthritis, hip osteoarthritis, arthroplasty, and elective surgery (appendix 1). The first  
24 screening of potentially relevant records was conducted by one author (DP) based on titles  
25 and abstract, and two authors (DP and GM) independently performed the final selection of  
26 included trials based on full-text evaluation. A third reviewer arbitrated in case of  
27 disagreement (MF). Moreover, the reference lists of included studies were checked for  
28 potential studies. An additional 26 references were screened, but none met our inclusion  
29 criteria. No restriction was applied on language.  
30  
31  
32  
33  
34  
35  
36  
37  
38  
39  
40  
41

### 42 *Study selection*

43 We included only longitudinal studies assessing the role of obesity or physical activity  
44 participation on the clinical outcomes following partial or total hip arthroplasty (THA) or  
45 partial or total knee arthroplasty (TKA) surgery. Clinical outcomes were defined in terms of  
46 pain, disability, quality of life, and complications post arthroplasty. To be eligible, studies  
47 had to be full reports; include participants who underwent elective arthroplasty of the hip  
48 or knee due to osteoarthritis; include data of pre-surgical and at least one post-surgical  
49 assessment of the clinical outcomes of interest; and assess the association between the  
50 predictors and outcomes of interest. Obesity and physical activity participation had to be  
51  
52  
53  
54  
55  
56  
57  
58  
59

1  
2  
3 assessed at baseline. Studies on revision surgery were excluded. Studies were not excluded  
4 based on intensity or duration of symptoms.  
5  
6

### 7 8 *Data extraction*

9  
10 Using a standardised form, data on study characteristics, predictors and outcome measures  
11 of interest were independently extracted from the included studies by two reviewers (DP  
12 and GM). A third author (MF) resolved any disagreement. Estimates of association between  
13 predictors and outcomes of interest were extracted as presented in each study and included  
14 odds ratios, risk ratios, correlations, mean differences or regression coefficients. When  
15 studies reported more than one tool regarding the same topic (e.g. WOMAC, HOOS, OHS,  
16 KOOS, KSS), estimates were extracted from the group with the largest sample size.  
17

18 We contacted the authors to provide further information when there were insufficient data  
19 reported in the manuscript. When authors were unavailable we estimated data using the  
20 recommendations in the Cochrane Handbook for Systematic Reviews of Interventions.(18)  
21  
22  
23  
24  
25  
26

### 27 28 *Outcome measures*

29  
30 Data on pain intensity was extracted as visual analogue scale (VAS) scores ranging from 0 to  
31 10 and measured directly or as part of the following measurement tools: the Western  
32 Ontario and McMaster Universities Osteoarthritis Index (WOMAC), the Hip disability and  
33 Osteoarthritis Outcome Score (HOOS), the Knee disability and Osteoarthritis Outcome Score  
34 (KOOS) or the Harris Hip Score (HHS). If studies reported more than one measure of pain  
35 intensity or disability for the cohort, the most severe measure at baseline was included in  
36 the pooled analyses. Disability measures included the Oxford Hip Score (OHS), ranging from  
37 12 to 60 being 12 the best result; Oxford Knee Score (OKS) ranging from 0 to 60 being 60 the  
38 best result; the Harris Hip Score (HHS) ranging from 0 to 100 being 100 the best result; Knee  
39 Society Score (KSS) ranging from 0 to 100 being 100 the best result; WOMAC total score  
40 ranging from 0 to 96 being 0 the best result; or WOMAC function subscale, ranging from 0  
41 to 10 being 10 the best result; and were converted into a uniform 0-100 scale where 0  
42 meant less disability. Extracted data on complications included any descriptive measure of  
43 the number of complications or number of patients with a complication reported during the  
44 study. Only two of the screened studies had reported specific raw data on quality of life  
45  
46  
47  
48  
49  
50  
51  
52  
53  
54  
55  
56  
57  
58  
59  
60

1  
2  
3 among the participants after joint arthroplasty, but due to differences in follow-up length,  
4 any meta-analysis made by merging this data would result in an unreliable measure.  
5  
6

### 7 8 *Methodological Quality Assessment*

9  
10 The methodological quality of included studies was assessed by two independent reviewers  
11 using the Newcastle-Ottawa Scale (NOS)(19) recommended by the Cochrane  
12 Collaboration.(18) The NOS consists of eight items grouped into 3 categories, namely:  
13 selection, comparability, and outcome. A star system, ranging from zero to nine stars, is  
14 used to classify the quality of the study being reviewed (the more stars the study receives in  
15 each category, the higher its methodological quality). After the independent assessment of  
16 included studies by the leading author, each study received the following categorical score  
17 representing its quality: good (3 or 4 stars in selection domain AND 1 or 2 stars in  
18 comparability domain AND 2 or 3 stars in outcome domain), fair (2 stars in selection domain  
19 AND 1 or 2 stars in comparability domain AND 2 or 3 stars in outcome domain) or poor (0 or  
20 1 star in selection domain OR 0 stars in comparability domain OR 0 or 1 star in outcome  
21 domain). A third reviewer (MF) resolved any disagreement between independent assessors.  
22  
23  
24  
25  
26  
27  
28  
29  
30  
31  
32

### 33 *Data analysis*

34 Data on baseline (i.e. pre-surgical scores) and postoperative outcome scores were weighed  
35 by the inverse study variance and used in fractional polynomial regression modelling to  
36 build graphs depicting the course of pain and disability over time. STATA14 was used for the  
37 analyses (Stata Corp LP, College Station, TX).(20)  
38  
39  
40  
41  
42

43 Meta-analyses were performed to assess the differences in pain, disability and  
44 complications post-surgery, between predictor groups (i.e. obese and non-obese groups as  
45 defined by included studies), using a random effects model. When possible, different  
46 analyses were performed for knee and hip arthroplasty and also for different levels of  
47 obesity (i.e. obesity and morbid obesity). When means and standard deviations of outcomes  
48 of interest were presented for multiple predictor groups in the same study (i.e. underweight  
49 (BMI<18), normal weight (BMI≥18<25), overweight (BMI≥25<30), and obese levels I  
50 (BMI≥30<35), II (BMI≥35<40) or III (BMI≥40)) these were combined into two groups (non-  
51  
52  
53  
54  
55  
56  
57  
58  
59  
60

1  
2  
3 obese: BMI<30 and obese: BMI≥30) as recommended in the Cochrane Handbook for  
4 Systematic Reviews of Interventions (18) before inclusion in the pooled analyses. Results  
5 were reported as standardised mean differences (SMD) and 95% confidence intervals  
6 (95%CI). Between-study heterogeneity was calculated using  $I^2$  ( $I^2 < 25\%$ : small heterogeneity;  
7  $25\% < I^2 < 75\%$ : moderate heterogeneity;  $I^2 > 75\%$ : large heterogeneity).(21) We have defined  
8 a standardised mean difference (SMD) of 0.2 as small difference, 0.5 as moderate difference  
9 and 0.8 as large difference.(22)  
10  
11  
12  
13  
14  
15

16 Assessment of publication bias was performed using funnel plots. The precision (i.e.  
17 standard error) of included studies was plotted against the difference in outcomes between  
18 groups (i.e. obese or non-obese) and results visually analysed. In the absence of publications  
19 bias or small study bias, smaller studies should be evenly spread around the base of the  
20 funnel, whilst the larger studies should be concentrated around the top of the funnel. Plot  
21 asymmetry was also quantified using the Egger's tests, for which a null hypothesis  
22 represents symmetry of plotted data.(23)  
23  
24  
25  
26  
27  
28

29 All meta-analyses were conducted using Comprehensive Meta-Analysis software  
30 (Comprehensive Meta-Analysis, Englewood, NJ). For studies not reporting enough data to  
31 be included in the meta-analyses, the reported individual associations were tabulated and  
32 qualitatively presented in the supplementary material.  
33  
34  
35  
36  
37

## 38 Results

39 Our search strategy identified 11,990 studies. After removing 381 duplicates, 11,220 studies  
40 were screened and excluded based on keywords, titles, and abstracts. All the remaining 389  
41 studies were written in English and were assessed by reading the full text, of which 327  
42 were then excluded, yielding 62 studies to be included in the systematic review.(24-85)  
43 From these, 31 presented enough data to be included in at least one of the meta-analyses  
44 (Figure 1).  
45  
46  
47  
48  
49  
50  
51

52 **Figure 1** – Flowchart of search strategy and screening steps.  
53  
54

## 55 *Included Studies*

56  
57  
58  
59  
60

1  
2  
3 Included studies reported data from 18 different countries: Australia,(40, 47, 72, 85)  
4 Canada,(38, 43, 78) China,(84) Denmark,(60) England,(27, 30) Finland,(49-52), France,(65,  
5 73) Germany,(55, 75, 81) Italy,(28, 29) Japan,(83) Netherlands,(57, 76) Norway,(45) Scotland  
6 (25, 36), South Korea,(56) Spain,(41, 80) Switzerland,(61, 62, 69) United Kingdom(26, 35, 37,  
7 46, 48, 53, 63, 67, 68, 71, 74) and USA.(24, 31-34, 39, 42, 44, 54, 58, 59, 64, 66, 70, 77, 79,  
8 82) Demographic data from each study are presented in table 1.  
9  
10  
11  
12  
13  
14

### 15 *Methodological Quality*

16 An overall quality assessment of the studies showed that 50% (n=31) of the included studies  
17 were considered as being of good methodological quality, whilst 1.5% (n=1) were  
18 considered fair and 48.5% (n=30) were considered of poor methodological quality. Of the  
19 screened studies, 56 (90%) had a follow-up rate of 80% or greater, and only half (n= 32  
20 studies) assessed outcomes via retrospective analysis of medical records, conducted  
21 adjustment for potential confounders (e.g. age or sex) or investigated a representative  
22 sample of the population (Appendix 2).  
23  
24  
25  
26  
27  
28  
29  
30

### 31 *Assessment of Publication Bias*

32  
33 Inspection of funnel plots and results of Egger's test confirmed no evidence of small study  
34 bias for those studies included in our pooled analyses, with p values ranging from 0.07 to  
35 0.43 (Appendix 3, 4 and 5).  
36  
37  
38  
39  
40  
41  
42  
43  
44  
45  
46  
47  
48  
49  
50  
51  
52  
53  
54  
55  
56  
57  
58  
59  
60

**Table 1** - Included studies and characteristics.

| Author, year           | Country        | Sample Size | Predictor | Outcomes                     | Surgery                         | Follow-Up Duration          | Quality Score |
|------------------------|----------------|-------------|-----------|------------------------------|---------------------------------|-----------------------------|---------------|
| AbdelSalam et al, 2012 | USA            | 210         | Obesity   | Complications                | Total Hip and Knee Arthroplasty | 9 years                     | Fair          |
| Amin et al, 2006 A     | United Kingdom | 328         | Obesity   | Complications;<br>Disability | Total Knee Replacement          | 6, 18, 36 and 60 months     | Poor          |
| Amin et al, 2006 B     | Scotland       | 82          | Obesity   | Complications                | Total Knee Replacement          | 38.5 months                 | Poor          |
| Andrew et al, 2008     | England        | 1,059       | Obesity   | Complications;<br>Disability | Total Hip Arthroplasty          | 3, 12, 24, 36 and 60 months | Poor          |
| Azodi et al, 2006      | Italy          | 3,309       | Obesity   | Complications                | Total Hip Replacement           | 6 to 9 years                | Fair          |
| Azodi et al, 2008      | Italy          | 2,106       | Obesity   | Complications                | Total Knee Arthroplasty         | 2 years                     | Fair          |
| Baker et al, 2012      | England        | 13,673      | Obesity   | Complications;<br>Disability | Total Hip Arthroplasty          | 6 months                    | Fair          |
| Belmont et al, 2014    | USA            | 17,514      | Obesity   | Complications                | Total Knee Arthroplasty         | 1 month                     | Fair          |
| Belmont et al, 2014    | USA            | 15,321      | Obesity   | Complications                | Total Knee Arthroplasty         | 1 month                     | Fair          |
| Bozic et al, 2012 A    | USA            | 40,919      | Obesity   | Complications                | Total Hip Arthroplasty          | 10 years                    | Fair          |
| Bozic et al, 2012 B    | USA            | 83,011      | Obesity   | Complications                | Total Knee Arthroplasty         | 10 years                    | Fair          |
| Chee et al, 2010       | United Kingdom | 106         | Obesity   | Complications;<br>Disability | Total Hip Arthroplasty          | 6, 18, 36 and 60 months     | Good          |
| Chesney et al, 2008    | Scotland       | 1,278       | Obesity   | Complications                | Total Knee Arthroplasty         | 6, 18 and 60 months         | Poor          |
| Collins et al, 2012    | United Kingdom | 385         | Obesity   | Complications;<br>Disability | Total Knee Arthroplasty         | 6, 18 months, 3, 6, 9 years | Poor          |
| Davis et al, 2011      | Canada         | 931         | Obesity   | Pain                         | Total Hip and Knee Arthroplasty | 2 weeks, 1, 3, 6, 12 months | Fair          |



|                           |                |        |         |                                    |                           |                 |      |
|---------------------------|----------------|--------|---------|------------------------------------|---------------------------|-----------------|------|
| Dewan et al, 2009         | USA            | 220    | Obesity | Complications;<br>Disability       | Total Knee Arthroplasty   | 5.4 years       | Poor |
| Dowsey et al, 2008        | Australia      | 1,207  | Obesity | Complications                      | Hip Arthroplasty          | 1 year          | Poor |
| Dowsey et al, 2010        | Australia      | 471    | Obesity | Complications; Pain;<br>Disability | Total Hip Arthroplasty    | 1 year          | Good |
| Font-Vizcarra et al, 2011 | Spain          | 402    | Obesity | Complications                      | Total Hip Arthroplasty    | 3 months        | Fair |
| Friedman et al, 2013      | USA            | 12,355 | Obesity | Complications                      | Hip and Knee Arthroplasty | 2 months        | Poor |
| Gandhi et al, 2010        | Canada         | 1,224  | Obesity | Pain; Disability                   | Total Hip Arthroplasty    | 1 year          | Good |
| Hamoui et al, 2006        | USA            | 63     | Obesity | Disability                         | Total Knee Arthroplasty   | 11.3 years      | Poor |
| Heiberg et al, 2013       | Norway         | 64     | Obesity | Pain                               | Total Hip Arthroplasty    | 3 and 12 months | Good |
| Ibrahim et al, 2005       | United Kingdom | 343    | Obesity | Complications                      | Total Hip Arthroplasty    | 1 year          | Poor |
| Jackson et al, 2009       | Australia      | 100    | Obesity | Complications; Pain;<br>Disability | Total Knee Replacement    | 9.2 years       | Poor |
| Jameson et al, 2014       | United Kingdom | 5,535  | Obesity | Disability                         | Hip Arthroplasty          | 6 months        | Fair |
| Jamsen et al, 2010        | Finland        | 2,647  | Obesity | Complications                      | Total Knee Arthroplasty   | 1 year          | Good |
| Jamsen et al, 2012        | Finland        | 7,181  | Obesity | Complications                      | Total Knee Arthroplasty   | 1 year          | Good |
| Jarvenpaa et al, 2010     | Finland        | 100    | Obesity | Complications; Pain                | Total Knee Arthroplasty   | 3 months        | Poor |
| Jarvenpaa et al, 2012     | Finland        | 52     | Obesity | Pain; Disability                   | Total Knee Arthroplasty   | 10.8 years      | Poor |
| Judge et al, 2010         | United Kingdom | 908    | Obesity | Disability                         | Hip Replacement           | 1 year          | Poor |

|                          |                |        |         |                                 |                                    |                              |      |
|--------------------------|----------------|--------|---------|---------------------------------|------------------------------------|------------------------------|------|
| Kandil et al, 2015       | USA            | 15,770 | Obesity | Complications                   | Unicompartmental Knee Arthroplasty | 3 months                     | Poor |
| Kessler et al, 2007      | Germany        | 67     | Obesity | Disability                      | Total Hip Replacement              | 10 days and 3 months         | Good |
| Kim et al, 2011          | South Korea    | 227    | Obesity | Complications                   | Total Knee Arthroplasty            | 6 months                     | Poor |
| Kort et al, 2007         | Netherlands    | 46     | Obesity | Complications                   | Unicompartmental Knee Replacement  | 2 years                      | Poor |
| Ledford et al, 2014      | USA            | 316    | Obesity | Complications                   | Total Hip and Knee Arthroplasty    | 2 months                     | Poor |
| Liabaud et al, 2013      | USA            | 273    | Obesity | Complications                   | Total Knee Arthroplasty            | 3 and 12 months              | Poor |
| Liljensøe et al, 2013    | Denmark        | 197    | Obesity | Pain; Disability                | Total Knee Arthroplasty            | 4 years                      | Poor |
| Luebbeke et al, 2007 A   | Switzerland    | 2,495  | Obesity | Complications; Disability       | Total Hip Arthroplasty             | 5 years                      | Good |
| Luebbeke et al, 2007 B   | Switzerland    | 325    | Obesity | Disability                      | Total Hip Arthroplasty             | 5 years                      | Good |
| Mackie et al, 2015       | United Kingdom | 1,821  | Obesity | Complications; Pain; Disability | Total Knee Arthroplasty            | 1 year                       | Poor |
| Madsen et al, 2014       | USA            | 79     | Obesity | Complications                   | Total Knee Arthroplasty            | 10 years                     | Poor |
| Maisongrosse et al, 2014 | France         | 502    | Obesity | Complications                   | Total Hip Arthroplasty             | 58 months                    | Poor |
| McLaughlin et al, 2006   | USA            | 198    | Obesity | Complications                   | Total Hip Replacement              | 14.5 years                   | Poor |
| Michalka et al, 2012     | United Kingdom | 191    | Obesity | Complications; Pain; Disability | Hip Arthroplasty                   | 6 weeks                      | Poor |
| Murray et al, 2013       | United Kingdom | 2,438  | Obesity | Complications; Disability       | Unicompartmental Knee Replacement  | 1 year                       | Poor |
| Naal et al, 2009         | Switzerland    | 83     | Obesity | Pain; Disability                | Total Knee Arthroplasty            | 6 weeks, 3, 12 and 24 months | Poor |
| Namba et al, 2005        | USA            | 1,813  | Obesity | Complications                   | Total Hip and Knee Arthroplasty    | 1 year                       | Poor |

|    |                         |                |       |                      |                              |                                       |                                |      |
|----|-------------------------|----------------|-------|----------------------|------------------------------|---------------------------------------|--------------------------------|------|
| 1  |                         |                |       |                      |                              |                                       |                                |      |
| 2  |                         |                |       |                      |                              |                                       |                                |      |
| 3  |                         |                |       |                      |                              |                                       |                                |      |
| 4  |                         |                |       |                      |                              |                                       |                                |      |
| 5  | Napier et al, 2014      | United Kingdom | 100   | Obesity              | Complications;<br>Disability | Total Knee Arthroplasty               | 3 and 12 months                | Poor |
| 6  |                         |                |       |                      |                              |                                       |                                |      |
| 7  | Naylor et al, 2008      | Australia      | 99    | Obesity              | Pain                         | Total Hip and Knee Arthroplasty       | 2, 6, 12, 26 and<br>52 weeks   | Good |
| 8  |                         |                |       |                      |                              |                                       |                                |      |
| 9  | Ollivier et al, 2012    | France         | 210   | Physical<br>Activity | Disability                   | Total Hip Arthroplasty                | 10 years                       | Fair |
| 10 |                         |                |       |                      |                              |                                       |                                |      |
| 11 | Patel et al, 2008       | United Kingdom | 527   | Obesity              | Complications                | Total Knee Replacement                | 4 weeks, 6 weeks<br>and 1 year | Good |
| 12 |                         |                |       |                      |                              |                                       |                                |      |
| 13 | Pietschmann et al, 2013 | Germany        | 171   | Physical<br>Activity | Disability                   | Unicompartmental Knee<br>Arthroplasty | 4.2 years                      | Poor |
| 14 |                         |                |       |                      |                              |                                       |                                |      |
| 15 | Poortinga et al, 2014   | Netherlands    | 658   | Physical<br>Activity | Disability                   | Total Hip and Knee Arthroplasty       | 1 year                         | Good |
| 16 |                         |                |       |                      |                              |                                       |                                |      |
| 17 | Pulido et al, 2008      | USA            | 9,245 | Obesity              | Complications                | Total Hip and Knee Arthroplasty       | 1 year                         | Fair |
| 18 |                         |                |       |                      |                              |                                       |                                |      |
| 19 | Rajgopal et al, 2008    | Canada         | 760   | Obesity              | Complications;<br>Disability | Total Knee Arthroplasty               | 1 year                         | Fair |
| 20 |                         |                |       |                      |                              |                                       |                                |      |
| 21 | Sechriest et al, 2007   | USA            | 34    | Physical<br>Activity | Disability                   | Total Hip Arthroplasty                | 5 years                        | Poor |
| 22 |                         |                |       |                      |                              |                                       |                                |      |
| 23 | Villalobos et al, 2013  | Spain          | 63    | Obesity              | Pain; Disability             | Total Hip Arthroplasty                | 3 months                       | Good |
| 24 |                         |                |       |                      |                              |                                       |                                |      |
| 25 | Vogl et al, 2014        | Germany        | 281   | Obesity              | Disability                   | Total Hip Arthroplasty                | 6 months                       | Poor |
| 26 |                         |                |       |                      |                              |                                       |                                |      |
| 27 | Wang et al, 2010        | USA            | 97    | Obesity              | Disability                   | Total Hip Arthroplasty                | 3 months, 1 and<br>2 years     | Fair |
| 28 |                         |                |       |                      |                              |                                       |                                |      |
| 29 | Yasunaga et al, 2009    | Japan          | 3,577 | Obesity              | Complications                | Total Knee Arthroplasty               | 5 months                       | Fair |
| 30 |                         |                |       |                      |                              |                                       |                                |      |
| 31 | Zhang et al, 2012       | China          | 714   | Obesity              | Complications;<br>Disability | Total Hip Arthroplasty                | 5 years                        | Poor |
| 32 |                         |                |       |                      |                              |                                       |                                |      |
| 33 |                         |                |       |                      |                              |                                       |                                |      |
| 34 |                         |                |       |                      |                              |                                       |                                |      |
| 35 |                         |                |       |                      |                              |                                       |                                |      |
| 36 |                         |                |       |                      |                              |                                       |                                |      |
| 37 |                         |                |       |                      |                              |                                       |                                |      |
| 38 |                         |                |       |                      |                              |                                       |                                |      |
| 39 |                         |                |       |                      |                              |                                       |                                |      |
| 40 |                         |                |       |                      |                              |                                       |                                |      |
| 41 |                         |                |       |                      |                              |                                       |                                |      |
| 42 |                         |                |       |                      |                              |                                       |                                |      |
| 43 |                         |                |       |                      |                              |                                       |                                |      |
| 44 |                         |                |       |                      |                              |                                       |                                |      |
| 45 |                         |                |       |                      |                              |                                       |                                |      |
| 46 |                         |                |       |                      |                              |                                       |                                |      |
| 47 |                         |                |       |                      |                              |                                       |                                |      |

### The course of pain and disability over time

Figure 2 presents the course of disability over time for hip (A) and knee osteoarthritis (B) post-surgery; as well as pain for hip (C) and knee osteoarthritis (D). The central line represents the estimated pooled mean over time, and the shaded area circumscribes its 95% confidence intervals. A total of eight studies with complete data (i.e. estimates of central tendency and variance) were included in the pain analysis and 17 studies were included in the disability analysis.

The fractional polynomial regression model resulted in a pooled mean disability score and standard deviation before hip arthroplasty of 59.42 (SD: 10.94; n=5,250). At 12 months post-surgery it had decreased to a mean of 31.31 (SD: 24.28; n= 3,017) and a further reduction was observed at 120 months, when the mean disability score after hip arthroplasty was 24.32 (SD: 19.53; n= 210). For knee osteoarthritis, a pooled mean disability score of 56.88 (SD: 10.74; n= 17,225) was observed for patients undergoing arthroplasty. At 12 months after surgery this value decreased to 21.80 (SD: 13.51; n= 2,898), whilst at the 110-month follow-up, the mean disability score was 14.18 (SD: 0.77; n= 485). The pooled mean pain scores before hip arthroplasty was 54.86 (SD: 10.20; n= 2,517), decreasing to 13.76 (SD: 1.32; n= 1,058) 3 months after surgery, 10.8 (SD: 1.69; n= 1,212) at 6 months and slightly increasing to 13.45 (SD: 7.87; n= 2,173) at the 12 month follow-up. For patients undergoing knee arthroplasty, the pooled pain score at baseline was 57.78 (SD: 9.28; n= 2,211); which decreased to 25.67 (SD: 6.61; n= 1,222) at 6 months, and 14.18 (SD: 0.77; n= 1,820) at the 12-month follow-up (figure 2).

**Figure 2** - Fractional polynomial analysis for hip (A) and knee (B) disability scores and hip (C) and knee (D) pain scores over time.

### Association between obesity and post-surgical pain outcomes

Fourteen studies investigated the association between obesity and pain intensity in a total of 5,687 patients after hip or knee arthroplasty. Seven of the 14 studies presented enough data to be pooled in a meta-analysis. There was an overall moderate and statistically significant difference in post-surgical pain between obese and non-obese patients post arthroplasty, with non-obese patients having better outcomes at short (SMD -0.43; 95%CI: -

0.67 to -0.19;  $p < 0.001$ ), and long-term timepoints (SMD -0.36; 95%CI: -0.47 to -0.24;  $p < 0.001$ ). The pooled results for separate joints suggest non-obese participants have significantly less short-term (i.e. less than 6 months) post-surgical knee pain, compared to obese participants (SMD -0.54; 95%CI: -0.90 to -0.19;  $p = 0.002$ ) and post-surgical hip pain (SMD -0.34; 95%CI: -0.66 to -0.01;  $p = 0.039$ ). Obesity was defined as having a BMI over 30  $\text{kg}/\text{m}^2$ . At long term (i.e. 6 months or longer), there was a significant moderate difference between obese and non-obese groups in terms of knee pain (SMD -0.36; 95%CI: -0.47 to -0.24;  $p < 0.001$ ), however there was no difference between groups for hip pain (SMD -0.32; 95%CI: -0.84 to 0.19;  $p = 0.222$ ) (figure 3). The results of individual studies not included in the pooled analyses are presented in table 2 below.

**Figure 3** – Pooled standardised mean difference in pain at short and long term post-surgery between obese and non-obese patients.

| Obesity vs Pain |                |                  |                                                                                                                                                                           |
|-----------------|----------------|------------------|---------------------------------------------------------------------------------------------------------------------------------------------------------------------------|
| Author, year    | BMI: Mean (SD) | Measure          | Results                                                                                                                                                                   |
| <b>Knee</b>     |                |                  |                                                                                                                                                                           |
| Davis 2011      | NA             | HOOS / KOOS      | After adjusting for age, gender, joint, and presence of back pain, an increased BMI was associated with worst pain outcomes ( $p < 0.02$ ) at long term after THA or TKA. |
| Jarvenpaa 2010  | 29.7 (NA)      | VAS              | Increased BMI correlates significantly to VAS pain scale ( $r = 0.236$ ; $p = 0.018$ ) at short term after TKA.                                                           |
| Liljensøe 2013  | 30 (NA)        | SF-36            | BMI was <b>not</b> associated with SF-36 pain scale (OR= 0.96; $p = 0.1$ ) at long term after TKA.                                                                        |
| Mackie 2015     | NA             | WOMAC            | Increased BMI was associated with less improvement in WOMAC pain scale ( $t = -2.64$ ; $p < 0.001$ ) at long term after TKA.                                              |
| <b>Hip</b>      |                |                  |                                                                                                                                                                           |
| Dowsey 2010     | 29.55 (5.64)*  | Harris Hip Score | BMI was <b>not</b> associated with pain reduction ( $p = 0.71$ ) at long term after THA.                                                                                  |
| Heiberg 2013    | 27 (6.27)*     | HOOS             | BMI was <b>not</b> associated with HOOS pain scale ( $p > 0.05$ ) at short term after THA.                                                                                |

**Table 2** – Results of individual studies on the association between post-surgical pain and baseline obesity.

BMI – Body Mass Index; SD – Standard deviation; THA – Total hip arthroplasty; TKA – Total knee arthroplasty; OR – Odds ratio; NA – None available; WOMAC – Western Ontario and McMaster Universities Osteoarthritis Index; HOOS - Hip dysfunction and Osteoarthritis Outcome Score; KOOS - Knee

dysfunction and Osteoarthritis Outcome Score; VAS – Visual Analogue Scale; SF-36 – Short Form 36 Questionnaire; \*Calculated following guidelines from Cochrane Handbook for Systematic Reviews of Interventions.

### Association between obesity and post-surgical disability outcomes

The impact of obesity on disability was investigated by 32 studies which compared post-surgery disability scores in 35,286 obese and non-obese participants. Of these, 19 studies presented complete data that was included in the pooled analysis. At short term, no statistically significant difference in overall disability between obese and non-obese participants was observed (SMD -0.15, 95% CI -0.41 to 0.10,  $p=0.231$ ). Likewise, no statistically significant difference was observed between obese and non-obese participants for post-surgical knee or hip disability (SMD -0.41, 95% CI -0.99 to 0.16,  $p=0.159$  and SMD -0.09, 95% CI -0.38 to 0.19,  $p=0.527$ , respectively).

At long term follow-up, however, there was an overall moderate and statistically significant difference in post-surgical disability between obese and non-obese patients regardless of the joint affected (SMD -0.32; 95%CI: -0.36 to -0.28;  $p<0.001$ ). That difference was still statistically significant and of moderate magnitude when knee and hip joints were analysed separately (SMD -0.31, 95% CI -0.36 to -0.26,  $p<0.001$  and SMD -0.34, 95% CI -0.44 to -0.25,  $p<0.001$ , respectively and favouring non-obese patients)(figure 4). The results of individual studies not included in the pooled analyses are presented in table 3 below.

**Figure 4** – Pooled standardised mean difference in disability at short and long term post-surgery between obese and non-obese patients.

| Obesity vs Disability |                |              |                                                                                                                                        |
|-----------------------|----------------|--------------|----------------------------------------------------------------------------------------------------------------------------------------|
| Author, year          | BMI: Mean (SD) | Measure      | Results                                                                                                                                |
| <b>Knee</b>           |                |              |                                                                                                                                        |
| Davis 2011            | NA             | WOMAC / KOOS | After adjusting for age, gender, joint, and presence of back pain, an increased BMI was associated with worst outcomes ( $p<0.02$ ) at |

|                  |              |                    |                                                                                                                                                                                                                                                                               |
|------------------|--------------|--------------------|-------------------------------------------------------------------------------------------------------------------------------------------------------------------------------------------------------------------------------------------------------------------------------|
|                  |              |                    | long term after TKA or THA.                                                                                                                                                                                                                                                   |
| Dewan 2009       | 31 (0.5)     | Knee Society Score | BMI was <b>not</b> associated with worst knee function ( $p>0.119$ ) at long term after TKA.                                                                                                                                                                                  |
| Hamoui 2006      | 27.93 (7.1)* | Knee Society Score | <b>No</b> significant association between BMI and KSS ( $p>0.05$ ) were found at long term after TKA.                                                                                                                                                                         |
| Kort 2007        | NA           | WOMAC              | Obesity was <b>not</b> related to disability score ( $p>0.05$ ) at long term after TKA.                                                                                                                                                                                       |
| Liljensøe 2013   | 30 (NA)      | Knee Society Score | Increased BMI was associated with worst knee scores (OR 0.95, 95% CI 0.9 to 1.0, $p=0.04$ ) at long term after TKA. These results did not change significantly after adjusting for age, sex, primary disease and surgical approach (OR 0.94, 95% CI 0.90 to 0.99, $p=0.02$ ). |
| Mackie 2015      | NA           | WOMAC              | Increased BMI was associated with less improvement in disability scores (WOMAC $t=-2.13$ ; $p=0.033$ ) at long term after TKA.                                                                                                                                                |
| Rajgopal 2008    | 32.3 (6.58)* | WOMAC              | The morbidly obese group (BMI $\geq 40$ , $n=69$ ) does <b>not</b> present a statistically significant difference in improvement in WOMAC score ( $p=0.669$ ) when compared to others BMI groups at long term after TKA.                                                      |
| <b>Hip</b>       |              |                    |                                                                                                                                                                                                                                                                               |
| Heiberg 2013     | 27 (6.27)*   | HHS                | Increased BMI was associated with lower HHS ( $p<0.05$ ) at short term after THA.                                                                                                                                                                                             |
| Jameson 2014     | NA           | OHS                | Increased BMI was <b>not</b> associated with changes in OHS ( $p>0.05$ ) at short term after THA.                                                                                                                                                                             |
| Luebbecke 2007 B | 26.4 (4.3)   | HHS                | Increased BMI was associated with lower hip score ( $r=-0.4$ , 95% CI -0.8 to -0.1) at long term after THA.                                                                                                                                                                   |
| McLaughlin 2006  | 26 (NA)      | HHS                | The obese group (BMI $\geq 30$ ; $n=95$ ) did <b>not</b> present any statistically significant difference from the non-obese group (BMI $<30$ , $n=103$ ) with regards to clinical outcomes assessed by HHS ( $p>0.05$ ) at long term after THA.                              |
| Vogl 2014        | 26.9 (4.9)   | WOMAC              | Obesity was associated with changes in WOMAC score ( $p<0.05$ ) at short term after THA.                                                                                                                                                                                      |
| Wang 2010        | 29.14 (6.23) | WOMAC              | Increased BMI was <b>not</b> associated with WOMAC score ( $p=0.114$ ) at long term after THA.                                                                                                                                                                                |

**Table 3** – Results of individual studies on the association between post-surgical disability and baseline obesity.

BMI – Body Mass Index; SD – Standard deviation; NA – None available; WOMAC – Western Ontario and McMaster Universities Osteoarthritis Index; KOOS - Knee disability and Osteoarthritis Outcome Score; TKA – Total knee arthroplasty; THA – Total hip arthroplasty; KSS – Knee Society Score; OR – Odds ratio; CI

1  
2  
3 – Confidence interval; HHS – Harris Hip Score; OHS – Oxford Hip Score; r – coefficient of association;  
4 \*Calculated following guidelines from Cochrane Handbook for Systematic Reviews of Interventions.  
5  
6  
7

### 8 **Association between obesity and post-surgical complications**

9 The association between obesity and complications after joint arthroplasty was assessed by  
10 40 studies including a total of 245,433 patients who underwent knee or hip arthroplasty. Of  
11 these, 17 presented enough data and were included in the meta-analyses.  
12  
13  
14  
15

16 The pooled results suggest that at short term follow-up, non-obese participants are less  
17 likely to have post-surgical deep vein thrombosis (DVT) (OR 0.48; 95% CI 0.25 to 0.91;  
18 p=0.024) when compared with obese participants (figure 5). A total of 13 studies were  
19 pooled (n=22,782) showing non-obese patients are also less likely to present any long-term  
20 (i.e.  $\geq 6$  months) dislocation (OR: 0.49; 95% CI: 0.31 to 0.79; p=0.003) and DVT (OR: 0.61;  
21 95% CI: 0.37 to 0.98; p=0.043). Non-significant difference between groups was observed  
22 between non-obese and obese participants for long-term revision surgery (OR: 0.66; 95% CI:  
23 0.34 to 1.27; p=0.217).  
24  
25  
26  
27  
28  
29  
30

31 The pooled analysis on short-term post-surgical infection for hip replacement showed that  
32 non-obese patients are less likely to develop infections compared to obese participants (OR  
33 0.33; 95% CI 0.18 to 0.59; p<0.001)(Figure 6). For knee replacement separate analyses were  
34 conducted for studies comparing obese to non-obese participants and those comparing  
35 morbidly obese to non-obese participants (Figure 7). The results suggest that non-obese  
36 patients are less likely to develop infections when compared to morbidly obese patients (OR  
37 0.42; 95% CI 0.23 to 0.78; p= 0.006). No association with post-surgical infection was  
38 observed when obese and non-obese participants were compared.  
39  
40  
41  
42  
43  
44  
45  
46

47 The overall pooled analysis for incidence of complications suggests that non-obese  
48 participants are less likely to present any post-surgical complication at the short or long  
49 term follow-ups (OR: 0.48; 95% CI: 0.25 to 0.91; p<0.001 and OR: 0.55; 95% CI: 0.41 to 0.74;  
50 p<0.001, respectively). The results of individual studies not included in the pooled analyses  
51 are presented in the table 4 below.  
52  
53  
54  
55  
56  
57  
58  
59  
60



**Figure 5** - Pooled association between complications and obesity at short term and long term follow-ups.

**Figure 6** – Pooled association between post-surgical infections and obesity for hip surgery.

**Figure 7** – Pooled association of post-surgical infections for knee surgery.\*

| Obesity vs Complications |                |            |                                                                                                                                                                      |
|--------------------------|----------------|------------|----------------------------------------------------------------------------------------------------------------------------------------------------------------------|
| Author, year             | BMI: Mean (SD) | Measure    | Results                                                                                                                                                              |
| Ollivier 2012            | 25.13 (3.14)*  | HHS / HOOS | At long term, high impact sports was associated with better HHS ( $p < 0.001$ ) after THA.                                                                           |
| Pietschmann 2013         | 28.4 (4.62)*   | OKS        | At long term, physical activities were <b>not</b> related to complications ( $p < 0.01$ ). Physically active patients had less pain and better OKS scores after UKA. |
| Poortinga 2014           | 28.7 (4.9)     | WOMAC      | At long term, physical activity was <b>not</b> associated with WOMAC score ( $p > 0.05$ ) after THA or TKA.                                                          |
| Sechriest 2007           | 28.1 (8.3)     | UCLA       | At long term increased BMI was <b>not</b> correlated to UCLA physical activity score ( $R = -0.07$ ; $p = 0.67$ ) after TKA.                                         |

**Table 4:** Results of individual studies investigating the association between obesity and post-surgical complications.

BMI – Body Mass Index; SD – Standard deviation; HHS – Harris Hip Score; HOOS - Hip disability and Osteoarthritis Outcome Score; THA – Total hip arthroplasty; OKS – Oxford Knee Score; UKA - Unicompartimental knee arthroplasty; WOMAC – Western Ontario and McMaster Universities Osteoarthritis Index; TKA – Total knee arthroplasty; UCLA - University of California, Los Angeles activity questionnaire; R – Correlation coefficient; \*Calculated following guidelines from Cochrane Handbook for Systematic Reviews of Interventions.

### Association between physical activity participation and disability

The association between physical activity and disability was investigated by four studies (73, 75, 76, 79) or 1,033 participants undergoing hip or knee arthroplasty. Included studies have not provided enough data to be pooled. The overall results from these 4 papers suggest that participants who practice more physical activity before the surgeries were more likely to experience less pain after either hip or knee surgery, however the evidence regarding

disability scores is still unclear with studies presenting contradictory results. Table 5 below presents the results of the individual studies.

| Physical Activity vs Disability |                |                   |                                                                                                                                                                                     |
|---------------------------------|----------------|-------------------|-------------------------------------------------------------------------------------------------------------------------------------------------------------------------------------|
| Author, year                    | BMI: Mean (SD) | Measure           | Results                                                                                                                                                                             |
| Ollivier 2012                   | 25.13 (3.14)*  | HHS / HOOS        | At long term, high impact sports were associated with better HHS ( $p < 0.001$ ) and HOOS ( $p < 0.05$ ) after THA.                                                                 |
| Pietschmann 2013                | 28.4 (4.62)*   | OKS / KSS / WOMAC | At long term, physical activities were <b>not</b> related to complications. Physically active patients had less pain and better OKS, KSS and WOMAC scores ( $p < 0.05$ ) after UKA. |
| Poortinga 2014                  | 28.7 (4.9)     | WOMAC             | At long term, physical activity was <b>not</b> associated with WOMAC score ( $p > 0.05$ ) after THA or TKA.                                                                         |
| Sechriest 2007                  | 28.1 (8.3)     | UCLA              | At long term increased BMI was <b>not</b> correlated to UCLA physical activity score ( $R = -0.07$ ; $p = 0.67$ ) after TKA.                                                        |

**Table 5** – Individual results on the association between physical activity and pain or disability.

BMI – Body Mass Index; SD – Standard deviation; HHS – Harris Hip Score; HOOS - Hip disability and Osteoarthritis Outcome Score; THA – Total hip arthroplasty; OKS – Oxford Knee Score; KSS – Knee Society Score; WOMAC – Western Ontario and McMaster Universities Osteoarthritis Index; UKA - Unicompartimental knee arthroplasty; TKA – Total knee arthroplasty; UCLA - University of California, Los Angeles activity questionnaire; R – Correlation coefficient; \*Calculated following guidelines from Cochrane Handbook for Systematic Reviews of Interventions.

## Discussion

### *Statement of principal findings*

Our results suggest that following surgery, non-obese patients experience further reductions in both pain and disability post knee and hip arthroplasty when compared to obese patients, where obesity has been defined as having a BMI of 30 kg/m<sup>2</sup> or over. These differences seemed to be more accentuated for knee pain outcomes following arthroplasty, than for hip pain or disability outcomes. Non-obese participants also experienced significantly less post-surgical complications, including dislocation, DVT and infection especially following hip arthroplasty. Our analyses also demonstrate that obesity is a reliable

1  
2  
3 predictor of complications after total hip arthroplasty and total knee arthroplasty, not only  
4 in the short term after the procedure but also at longer follow-ups. The evidence regarding  
5 pre-operative physical activity remains unclear due to conflicting results of included studies,  
6 especially in terms of post-operative disability. The four included cohort studies however,  
7 suggest that physical activity participation is associated with better pain outcomes following  
8 surgery.  
9  
10  
11  
12  
13  
14

15 Our results from the fractional polynomial analysis have also shown that all patients  
16 experienced an improvement in pain and disability post-surgery. The observed decrease in  
17 pain from baseline was approximately 70% at 6 months and 75% at 12 months, with  
18 decreases in disability of 55% at 12 months and 67% at 120 months. The interpretation of  
19 the postsurgical course of pain and disability, however, needs to be taken in the context of  
20 the inclusion criteria we have used in our review, given we have only included data from  
21 cohort studies that have assessed the role of obesity or physical activity participation on  
22 surgical outcomes.  
23  
24  
25  
26  
27  
28  
29

30 *Strengths and weaknesses in relation to other studies, discussing particularly any differences*  
31 *in results*  
32

33  
34 Our meta-analysis results regarding the association between obesity and post-surgical  
35 complications found that obese patients present higher complication rates than non-obese  
36 patients. These results are consistent with the findings of previous systematic reviews of  
37 Hofstede,(14) Samson(15) and Liu.(16) Our meta-analysis results regarding the association  
38 between obesity and post-surgery disability also agreed with the findings of Buirs et al(13)  
39 and Samson et al(15) which found that obesity (defined as having BMI over 30 kg/m<sup>2</sup>), was  
40 associated with worst postsurgical functional score. The only previous review which has  
41 performed a meta-analysis on the association between obesity and post arthroplasty pain or  
42 disability limited its inclusion criteria to hip joint.(16) That review included a total of 15  
43 studies in their meta-analysis and found that obesity increases the risk of post-surgical  
44 complications (RR: 1.68, 95% CI 1.23 to 2.30, P = 0.0004) and is associated with worse  
45 disability scores following surgery (MD: -2.75, 95% CI -4.77 to -0.6; P = 0.07). Our study has  
46 included 33 cohorts of hip arthroplasty participants in the qualitative analysis, 16 in the  
47 meta-analyses, and confirms past findings that obesity is associated with worse outcomes in  
48  
49  
50  
51  
52  
53  
54  
55  
56  
57  
58  
59  
60

1  
2  
3 terms of not only disability and complications, but also pain at both short and long term  
4 periods following surgery. Hofstede et al(14) have also conducted a systematic review of the  
5 literature on pre-operative predictors of surgical outcomes after hip replacement in patients  
6 with osteoarthritis. Although those authors included 35 studies, only 5 studies investigated  
7 the effect of obesity on post-surgical pain, disability and quality of life.(14) No meta-analysis  
8 was performed.  
9  
10  
11  
12

### 13 14 15 *Implications for clinicians or policy makers*

16 Our results have a direct impact on clinical practice as the results demonstrate that obese  
17 patients have a higher risk of complications and a poorer prognosis in terms of pain and  
18 disability post-operatively when compared with non-obese patients. These results also  
19 allude to the importance of identifying and implementing effective pre-surgical  
20 rehabilitation and weight loss approaches to optimise post-surgical outcomes and minimise  
21 harm to the patient. The importance of weight loss has been highlighted in international  
22 clinical guidelines on non-surgical management of knee osteoarthritis for instance, given the  
23 pain and disability reductions observed following weight loss regimes.(86) Past research also  
24 suggests there is a dose-response relationship between weight loss and clinical outcome  
25 improvement. A recent completer-type analysis of 1,383 participants with knee  
26 osteoarthritis showed that a weight loss of 7.7% of body weight or more is associated with  
27 clinically important changes in pain and disability, as measured using the Knee Injury and  
28 Osteoarthritis Outcome Score (KOOS).(87) This evidence reinforces the importance of pre-  
29 surgical weight loss programs and strategies in order to optimize post-surgical recovery.  
30  
31  
32  
33  
34  
35  
36  
37  
38  
39  
40  
41

### 42 *Strengths and weaknesses of the study*

43 The current review has included 62 cohort studies and a total of 256,481 participants and is  
44 the most comprehensive systematic review on the topic to date. It is also the first review to  
45 use a quantitative approach to synthesize the results of pain, disability and surgical  
46 complications between non-obese and obese participants and consider the physical activity  
47 level of participants who underwent to hip or knee arthroplasty due to osteoarthritis. Our  
48 review has some limitations. The methodological quality of the included studies was in  
49 general poor. The most common methodological flaw among included cohorts was not  
50 controlling for confounding factors age, sex or BMI (32 studies, 51%) followed by not using a  
51  
52  
53  
54  
55  
56  
57  
58  
59  
60

1  
2  
3 representative sample (n=30 studies, 48%). Moreover, we have observed great variability of  
4 follow-up duration across studies, ranging from 2 weeks to 11 years. We have used a cut-off  
5 of 6 months to define short (i.e. < 6 months) or long-term (i.e. ≥ 6 months) follow-ups, but  
6 acknowledge that within each follow-up category there was substantial variation in the  
7 duration of follow-up across studies.  
8  
9  
10

11  
12 Between-study heterogeneity has also been observed in some of the pooled analysis for  
13 obesity presented in this review. A potential source of between-study heterogeneity include  
14 the variability in the definition of obesity categories across studies. Although obesity was  
15 assessed using BMI scores in all studies some studies have used only two obesity groups (i.e.  
16 obese or non-obese) while others used several categories including underweight, normal or  
17 overweight, obese and morbidly obese. These needed to be combined for some of our  
18 pooled analyses.  
19  
20  
21  
22  
23  
24

25 Another potential source of between-study heterogeneity across is the difference in surgical  
26 procedures used across studies. For instance, in the pooled analysis of risk of post-surgical  
27 DVT and obesity, whilst Kandil et al (54) performed unicompartmental knee arthroplasties,  
28 Friedman et al (42) performed total arthroplasties on both hip and knee joints. That  
29 discrepancy might explain the different results reported by these two studies (figure 5).  
30 Likewise, the mean physical activity load reported by the included studies varied  
31 substantially, ranging from low to high frequency of participation in low and high impact  
32 activities. This should be taken into consideration when interpreting the physical activity  
33 results.  
34  
35  
36  
37  
38  
39  
40

#### 41 **Conclusion**

42  
43 Our results have shown that obese patients undergoing hip or knee arthroplasty due to  
44 osteoarthritis have worse outcomes in terms of pain and complications when compared to  
45 non-obese patients, with differences more accentuated for patients with knee  
46 osteoarthritis. Likewise, obese patients will have worse surgical outcomes in terms of  
47 disability, but only at long-term follow-ups. It is still unclear whether pre-surgical physical  
48 activity participation has an impact on surgical outcomes. However, we acknowledge that  
49 the health benefits of physical activity participation for patients with knee and hip  
50 osteoarthritis are multiple and reach beyond those considered in this review.  
51  
52  
53  
54  
55  
56  
57  
58  
59  
60

## Acknowledgements

The abstract of this work has been published in the conference proceedings of the 2017 Osteoarthritis Research Society International.

The authors would like to acknowledge the participation of Ms Giovana Visentini in the independent methodological quality assessment of the included studies.

**Contributors:** DP, GCM, PHF, FB and MF were involved in the conception and design of the review. DP, GCM and MF developed the search strategy and performed study selection. DP and GCM extracted data from included studies. DP and GV assessed the methodological quality of included studies. DP and MLF were involved in the data analysis. DP, GCM, PHF, FB and MF were involved in the interpretation and discussion of results. DP drafted the manuscript, and GCM, PHF, FB and MF contributed to the drafting of the review. GCM, PHF, FB and MF revised it critically for important intellectual content. All authors approved the final version of the article. All authors had access to all of the data in the study and can take responsibility for the integrity of the data and the accuracy of the data analysis.

**Funding:** This research received no specific grant from any funding agency in the public, commercial, or not-for-profit sectors. DP is a Ph.D. student and holds the Science Without Borders Scholarship from the Brazilian Government. This work was carried out with CNPq support, National Council for Scientific and Technological Development – Brazil. MF holds a Sydney Medical Foundation Fellowship.

**Ethical approval:** Not required.

**Data sharing:** All data extracted from papers and used to write this paper is available to whoever ask. Contact the correspondence author for further information.

**Transparency:** The lead author (Daniel Pozzobon) affirms that the manuscript is an honest, accurate, and transparent account of the study being reported; no important aspects of the study have been omitted.

## References

1. Neogi T. The epidemiology and impact of pain in osteoarthritis. *Osteoarthritis and Cartilage*. 2013;21(9):1145-53.
2. Flegal KM, Carroll MDO, Cynthia L. Curtin, Lester R. Prevalence and Trends in Obesity Among US Adults, 1999-2008. *Journal of American Medical Association*. 2010;303(3).
3. Sharif B, Kopec J, Bansback N, Rahman MM, Flanagan WM, Wong H, et al. Projecting the direct cost burden of osteoarthritis in Canada using a microsimulation model. *Osteoarthritis and Cartilage*. 2015;23(10):1654-63.
4. Chen A, Gupte C, Akhtar K, Smith P, Cobb J. The Global Economic Cost of Osteoarthritis: How the UK Compares. *Arthritis*. 2012;2012:6.
5. Wood AM, Brock TM, Heil K, Holmes R, Weusten A. A Review on the Management of Hip and Knee Osteoarthritis. *International Journal of Chronic Diseases*. 2013;2013:10.
6. Katz JN, Earp BE, Gomoll AH. Surgical Management of Osteoarthritis. *Arthritis care & research*. 2010;62(9):1220-8.
7. Johnson VL, Hunter DJ. The epidemiology of osteoarthritis. *Best Practice & Research Clinical Rheumatology*. 2014;28(1):5-15.
8. Lee I-M, Shiroma EL, F. Puska, P. Blair, SN. Katzmarzyk, PT. Effect of physical inactivity on major non-communicable diseases worldwide: an analysis of burden of disease and life expectancy. *The Lancet*. 2012;380:29.
9. Zeni JA, Snyder-Mackler L. Most patients gain weight in the 2 years after total knee arthroplasty: Comparison to a healthy control group. *Osteoarthritis and Cartilage*. 2010;18(4):510-4.
10. Núñez M, Lozano L, Núñez E, Segur JM, Sastre S, Maculé F, et al. Total knee replacement and health-related quality of life: Factors influencing long-term outcomes. *Arthritis & Rheumatism: Arthritis Care & Research*. 2009;61(8):1062-9.
11. Amin AK, Sales JD, Brenkel IJ. Obesity and total knee and hip replacement. *Current Orthopaedics*. 2006;20(3):216-21.
12. Wagenmakers R, Stevens M, Groothoff JW, Zijlstra W, Bulstra SK, van Beveren J, et al. Physical Activity Behavior of Patients 1 Year After Primary Total Hip Arthroplasty: A Prospective Multicenter Cohort Study. *Physical Therapy*. 2011;91(3):373-80.
13. Buirs LD, Van Beers LW, Scholtes VA, Pastoors T, Sprague S, Poolman RW. Predictors of physical functioning after total hip arthroplasty: a systematic review. *BMJ Open*. 2016;6(9):e010725.
14. Hofstede SN, Gademan MGJ, Vliet Vlieland TPM, Nelissen RGHH, Marang-van de Mheen PJ. Preoperative predictors for outcomes after total hip replacement in patients with osteoarthritis: a systematic review. *BMC Musculoskeletal Disorders*. 2016;17(1):212.
15. Samson AJ, Mercer GE, Campbell DG. Total knee replacement in the morbidly obese: a literature review. *ANZ J Surg*. 2010;80(9):595-9.
16. Liu W, Wahafu T, Cheng M, Cheng T, Zhang Y, Zhang X. The influence of obesity on primary total hip arthroplasty outcomes: A meta-analysis of prospective cohort studies. *Orthopaedics & Traumatology: Surgery & Research*. 2015;101(3):289-96.
17. Liberati A, Altman DG, Tetzlaff J, Mulrow C, Gøtzsche PC, Ioannidis JPA, et al. The PRISMA statement for reporting systematic reviews and meta-analyses of studies that evaluate healthcare interventions: explanation and elaboration. *The BMJ*. 2009;339:b2700.
18. Higgins J, Green S, (editors). *Cochrane Handbook for Systematic Reviews of Interventions Version 5.1.0 [updated March 2011]*. The Cochrane Collaboration; 2011. Available from: <http://handbook.cochrane.org>.
19. Wells G, Shea B, O'Connell D, Peterson J, Welch V, Losos M, et al. The Newcastle-Ottawa Scale (NOS) for assessing the quality of nonrandomised studies in meta-analyses. [cited 2017 29/08/17]. Available from: [http://www.ohri.ca/programs/clinical\\_epidemiology/oxford.asp](http://www.ohri.ca/programs/clinical_epidemiology/oxford.asp).
20. Royston P, Sauerbrei W. *Fractional Polynomials for One Variable*. *Multivariable Model-Building*: John Wiley & Sons, Ltd; 2008. p. 71-98.

21. Higgins JPT, Thompson SG, Deeks JJ, Altman DG. Measuring inconsistency in meta-analyses. *BMJ : British Medical Journal*. 2003;327(7414):557-60.
22. Cohen J. *Statistical power analysis of the behavioral sciences*: New York: Academic Press; 1988.
23. Sedgwick P. Meta-analyses: how to read a funnel plot. *BMJ : British Medical Journal*. 2013;346.
24. AbdelSalam H, Restrepo C, Tarity TD, Sangster W, Parvizi J. Predictors of Intensive Care Unit Admission After Total Joint Arthroplasty. *Journal of Arthroplasty*. 2012;27(5):720-5.
25. Amin AK, Clayton RA, Patton JT, Gaston M, Cook RE, Brenkel IJ. Total knee replacement in morbidly obese patients. Results of a prospective, matched study. *Journal of Bone & Joint Surgery, British Volume*. 2006 B;88B(10):1321-6.
26. Amin AK, Patton JT, Cook RE, Brenkel IJ. Does obesity influence the clinical outcome at five years following total knee replacement for osteoarthritis? *Journal of Bone & Joint Surgery, British Volume*. 2006 A;88B(3):335-40.
27. Andrew JG, Palan J, Kurup HV, Gibson P, Murray DW, Beard DJ. Obesity in total hip replacement. *Journal of Bone & Joint Surgery, British Volume*. 2008;90B(4):424-9.
28. Azodi OS, Adami J, Lindstroem D, Eriksson KO, Wladis A, Bellocco R. High body mass index is associated with increased risk of implant dislocation following primary total hip replacement - 2,106 patients followed for up to 8 years. *Acta Orthopaedica*. 2008;79(1):141-7.
29. Azodi OS, Bellocco R, Eriksson K, Adami J. The impact of tobacco use and body mass index on the length of stay in hospital and the risk of post-operative complications among patients undergoing total hip replacement. *Journal of Bone and Joint Surgery-British Volume*. 2006;88B(10):1316-20.
30. Baker P, Petheram T, Jameson S, Reed M, Gregg P, Deehan D. The association between body mass index and the outcomes of total knee arthroplasty. *Journal of Bone & Joint Surgery, American Volume*. 2012;94(16):1501-8.
31. Belmont PJ, Jr., Goodman GP, Hamilton W, Waterman BR, Bader JO, Schoenfeld AJ. Morbidity and Mortality in the Thirty-Day Period Following Total Hip Arthroplasty: Risk Factors and Incidence. *Journal of Arthroplasty*. 2014 A;29(10):2025-30.
32. Belmont PJ, Jr., Goodman GP, Waterman BR, Bader JO, Schoenfeld AJ. Thirty-Day Postoperative Complications and Mortality Following Total Knee Arthroplasty. *Journal of Bone and Joint Surgery-American Volume*. 2014 B;96A(1):20-6.
33. Bozic KJ, Lau E, Kurtz S, Ong K, Berry DJ. Patient-related Risk Factors for Postoperative Mortality and Periprosthetic Joint Infection in Medicare Patients Undergoing TKA. *Clinical Orthopaedics and Related Research*. 2012 B;470(1):130-7.
34. Bozic KJ, Lau E, Kurtz S, Ong K, Rubash H, Vail TP, et al. Patient-related risk factors for periprosthetic joint infection and postoperative mortality following total hip arthroplasty in medicare patients. *Journal of Bone & Joint Surgery, American Volume*. 2012 A;94(9):794-800.
35. Chee YH, Teoh KH, Sabnis BM, Ballantyne JA, Brenkel IJ. Total hip replacement in morbidly obese patients with osteoarthritis: RESULTS OF A PROSPECTIVELY MATCHED STUDY. *Journal of Bone & Joint Surgery, British Volume*. 2010;92(8):1066-71.
36. Chesney D, Sales J, Elton R, Brenkel IJ. Infection After Knee Arthroplasty. A Prospective Study of 1509 Cases. *Journal of Arthroplasty*. 2008;23(3):355-9.
37. Collins RA, Walmsley PJ, Amin AK, Brenkel IJ, Clayton RAE. Does obesity influence clinical outcome at nine years following total knee replacement? *Journal of Bone and Joint Surgery - Series B*. 2012;94 B(10):1351-5.
38. Davis AM, Perruccio AV, Ibrahim S, Hogg-Johnson S, Wong R, Streiner DL, et al. The trajectory of recovery and the inter-relationships of symptoms, activity and participation in the first year following total hip and knee replacement. *Osteoarthritis and Cartilage*. 2011;19(12):1413-21.



- 1  
2  
3 39. Dewan A, Bertolusso R, Karastinos A, Conditt M, Noble PC, Parsley BS. Implant Durability and  
4 Knee Function After Total Knee Arthroplasty in the Morbidly Obese Patient. *Journal of Arthroplasty*.  
5 2009;24(6 SUPPL.):89-94.e3.
- 6 40. Dowsey MM, Liew D, Stoney JD, Choong PF. The impact of obesity on weight change and  
7 outcomes at 12 months in patients undergoing total hip arthroplasty. *Medical Journal of Australia*.  
8 2010;193(1):17-21.
- 9 41. Font-Vizcarra L, Tornero E, Bori G, Bosch J, Mensa J, Soriano A. Relationship between  
10 intraoperative cultures during hip arthroplasty, obesity, and the risk of early prosthetic joint  
11 infection: A prospective study of 428 patients. *International Journal of Artificial Organs*.  
12 2011;34(9):870-5.
- 13 42. Friedman RJ, Hess S, Berkowitz SD, Homering M. Complication Rates After Hip or Knee  
14 Arthroplasty in Morbidly Obese Patients. *Clinical Orthopaedics and Related Research*.  
15 2013;471(10):3358-66.
- 16 43. Gandhi R, Razak F, Davey JR, Mahomed NN. Metabolic syndrome and the functional  
17 outcomes of hip and knee arthroplasty. *Journal of Rheumatology*. 2010;37(9):1917-22.
- 18 44. Hamoui N, Kantor S, Vince K, Crookes PF. Long-term outcome of total knee replacement:  
19 Does obesity matter? *Obesity Surgery*. 2006;16(1):35-8.
- 20 45. Heiberg KE, Ekeland A, Bruun-Olsen V, Mengshoel AM. Recovery and prediction of physical  
21 functioning outcomes during the first year after total hip arthroplasty. *Archives of Physical Medicine  
22 & Rehabilitation*. 2013;94(7):1352-9.
- 23 46. Ibrahim T, Hobson S, Beiri A, Esler CN. No influence of body mass index on early outcome  
24 following total hip arthroplasty. *International Orthopaedics*. 2005;29(6):359-61.
- 25 47. Jackson MP, Sexton SA, Walter WL, Walter WK, Zicat BA. The impact of obesity on the mid-  
26 term outcome of cementless total knee replacement. *Journal of Bone & Joint Surgery, British  
27 Volume*. 2009;91(8):1044-8.
- 28 48. Jameson SS, Mason JM, Baker PN, Elson DW, Deehan DJ, Reed MR. The impact of body mass  
29 index on patient reported outcome measures (proms) and complications following primary hip  
30 arthroplasty. *Journal of Arthroplasty*. 2014;29(10):1889-98.
- 31 49. Jamsen E, Nevalainen P, Eskelinen A, Huotari K, Kalliovalkama J, Moilanen T. Obesity,  
32 diabetes, and preoperative hyperglycemia as predictors of periprosthetic joint infection: A single-  
33 center analysis of 7181 primary hip and knee replacements for osteoarthritis. *Journal of Bone and  
34 Joint Surgery - Series A*. 2012;94(14):e101.1-e.9.
- 35 50. Jamsen E, Varonen M, Huhtala H, Lehto MUK, Lumio J, Konttinen YT, et al. Incidence of  
36 Prosthetic Joint Infections After Primary Knee Arthroplasty. *Journal of Arthroplasty*. 2010;25(1):87-  
37 92.
- 38 51. Jarvenpaa J, Kettunen J, Kroger H, Miettinen H. Obesity may impair the early outcome of  
39 total knee arthroplasty. A prospective study of 100 patients. *Scandinavian Journal of Surgery*.  
40 2010;99(1):45-9.
- 41 52. Jarvenpaa J, Kettunen J, Soininvaara T, Miettinen H, Kroger H. Obesity has a negative impact  
42 on clinical outcome after total knee arthroplasty. *Scandinavian Journal of Surgery*. 2012;101(3):198-  
43 203.
- 44 53. Judge A, Cooper C, Williams S, Dreinhoefer K, Dieppe P. Patient-reported outcomes one year  
45 after primary hip replacement in a European collaborative cohort. *Arthritis Care and Research*.  
46 2010;62(4):480-8.
- 47 54. Kandil A, Werner BC, Gwathmey WF, Browne JA. Obesity, Morbid Obesity and their Related  
48 Medical Comorbidities are Associated with Increased Complications and Revision Rates after  
49 Unicompartamental Knee Arthroplasty. *Journal of Arthroplasty*. 2015;30(3):456-60.
- 50 55. Kessler S, Kaefert W. Overweight and obesity: Two predictors for worse early outcome in  
51 total hip replacement? *Obesity*. 2007;15(11):2840-5.
- 52 56. Kim K-I, Cho K-Y, Jin W, Khurana SS, Bae D-K. Recent Korean Perspective of Deep Vein  
53 Thrombosis After Total Knee Arthroplasty. *Journal of Arthroplasty*. 2011;26(7):1112-6.
- 54  
55  
56  
57  
58  
59  
60

- 1  
2  
3 57. Kort NP, van Raay JJ, van Horn JJ. The Oxford phase III unicompartmental knee replacement  
4 in patients less than 60 years of age. *Knee Surgery, Sports Traumatology, Arthroscopy*.  
5 2007;15(4):356-60.
- 6 58. Ledford CK, Ruberte Thiele RA, Appleton JS, Jr., Butler RJ, Wellman SS, Attarian DE, et al.  
7 Percent body fat more associated with perioperative risks after total joint arthroplasty than body  
8 mass index. *Journal of Arthroplasty*. 2014;29(9 Suppl):150-4.
- 9 59. Liabaud B, Patrick DA, Geller JA. Higher Body Mass Index Leads to Longer Operative Time in  
10 Total Knee Arthroplasty. *Journal of Arthroplasty*. 2013;28(4):563-5.
- 11 60. Liljensøe A, Lauersen JO, Søballe K, Mechlenburg I. Overweight preoperatively impairs  
12 clinical outcome after knee arthroplasty. *Acta Orthopaedica*. 2013;84(4):392-7.
- 13 61. Lüebbeke A, Katz JN, Perneger TV, Hoffmeyer P. Primary and revision hip arthroplasty: 5-  
14 year outcomes and influence of age and comorbidity. *Journal of Rheumatology*. 2007 B;34(2):394-  
15 400.
- 16 62. Luebbeke A, Stern R, Garavaglia G, Zurcher L, Hoffmeyer P. Differences in outcomes of obese  
17 women and men undergoing primary total hip arthroplasty. *Arthritis & Rheumatism-Arthritis Care &  
18 Research*. 2007 A;57(2):327-34.
- 19 63. Mackie A, Muthumayandi K, Shirley M, Deehan D, Gerrand C. Association between body  
20 mass index change and outcome in the first year after total knee arthroplasty. *Journal of  
21 Arthroplasty*. 2015;30(2):206-9.
- 22 64. Madsen AA, Taylor BC, Dimitris C, Hansen DC, Steensen RA, Gaines ST. Safety of bilateral  
23 total knee arthroplasty in morbidly obese patients. *Orthopedics*. 2014;37(3):e252-9.
- 24 65. Maisongrosse P, Lepage B, Cavaignac E, Pailhe R, Reina N, Chiron P, et al. Obesity is no  
25 longer a risk factor for dislocation after total hip arthroplasty with a double-mobility cup.  
26 *International Orthopaedics*. 2014.
- 27 66. McLaughlin JR, Lee KR. The outcome of total hip replacement in obese and non-obese  
28 patients at 10- to 18-years. *Journal of Bone & Joint Surgery, British Volume*. 2006;88B(10):1286-92.
- 29 67. Michalka PK, Khan RJ, Scaddan MC, Haebich S, Chirodian N, Wimhurst JA. The influence of  
30 obesity on early outcomes in primary hip arthroplasty. *Journal of Arthroplasty*. 2012;27(3):391-6.
- 31 68. Murray DW, Pandit H, Weston-Simons JS, Jenkins C, Gill HS, Lombardi AV, et al. Does body  
32 mass index affect the outcome of unicompartmental knee replacement? *Knee*. 2013;20(6):461-5.
- 33 69. Naal FD, Neuerburg C, Salzmann GM, Kriner M, von Knoch F, Preiss S, et al. Association of  
34 body mass index and clinical outcome 2 years after unicompartmental knee arthroplasty. *Archives of  
35 Orthopaedic and Trauma Surgery*. 2009;129(4):463-8.
- 36 70. Namba RS, Paxton L, Fithian DC, Stone ML. Obesity and perioperative morbidity in total hip  
37 and total knee arthroplasty patients. *Journal of Arthroplasty*. 2005;20(SUPPL. 3):46-50.
- 38 71. Napier RJ, O'Brien S, Bennett P, Doran E, Sykes A, Murray J, et al. Intra-operative and short  
39 term outcome of total knee arthroplasty in morbidly obese patients. *Knee*. 2014;21(3):784-8.
- 40 72. Naylor JM, Harmer AR, Heard RC. Severe other joint disease and obesity independently  
41 influence recovery after joint replacement surgery: An observational study. *Australian Journal of  
42 Physiotherapy*. 2008;54(1):57-64.
- 43 73. Ollivier M, Frey S, Parratte S, Flecher X, Argenson JN. Does impact sport activity influence  
44 total hip arthroplasty durability? *Clin Orthop*. 2012;470(11):3060-6.
- 45 74. Patel AD, Albrizio M. Relationship of body mass index to early complications in knee  
46 replacement surgery. *Archives of Orthopaedic and Trauma Surgery*. 2008;128(1):5-9.
- 47 75. Pietschmann MF, Wohlleb L, Weber P, Schmidutz F, Fickscherer A, Guelecycuez MF, et al.  
48 Sports activities after medial unicompartmental knee arthroplasty Oxford III-What can we expect?  
49 *International Orthopaedics*. 2013;37(1):31-7.
- 50 76. Poortinga S, Van Den Akker-Scheek I, Bulstra SK, Stewart RE, Stevens M. Preoperative  
51 physical activity level has no relationship to the degree of recovery one year after primary total hip  
52 or knee arthroplasty: A cohort study. *PLoS ONE*. 2014;9(12).
- 53  
54  
55  
56  
57  
58  
59  
60

- 1  
2  
3 77. Pulido L, Ghanem E, Joshi A, Purtill JJ, Parvizi J. Periprosthetic joint infection: the incidence,  
4 timing, and predisposing factors. *Clin Orthop*. 2008;466(7):1710-5.  
5 78. Rajgopal V, Bourne RB, Chesworth BM, MacDonald SJ, McCalden RW, Rorabeck CH. The  
6 impact of morbid obesity on patient outcomes after total knee arthroplasty. *Journal of Arthroplasty*.  
7 2008;23(6):795-800.  
8 79. Sechriest VF, II, Kyle RF, Marek DJ, Spates JD, Saleh KJ, Kuskowski M. Activity level in young  
9 patients with primary total hip arthroplasty - A 5-year minimum follow-up. *Journal of Arthroplasty*.  
10 2007;22(1):39-47.  
11 80. Villalobos PA, Navarro-Espigares JL, Hernandez-Torres E, Martinez-Montes JL, Villalobos M,  
12 Arroyo-Morales M. Body Mass Index as Predictor of Health-Related Quality-of-Life Changes After  
13 Total Hip Arthroplasty: A Cross-Over Study. *Journal of Arthroplasty*. 2013;28(4):666-70.  
14 81. Vogl M, Wilkesmann R, Lausmann C, Hunger M, Plotz W. The impact of preoperative patient  
15 characteristics on health states after total hip replacement and related satisfaction thresholds: A  
16 cohort study. *Health and Quality of Life Outcomes*. 2014;12(1).  
17 82. Wang W, Morrison TA, Geller JA, Yoon RS, Macaulay W. Predicting Short-Term Outcome of  
18 Primary Total Hip Arthroplasty A Prospective Multivariate Regression Analysis of 12 Independent  
19 Factors. *Journal of Arthroplasty*. 2010;25(6):858-64.  
20 83. Yasunaga H, Tsuchiya K, Matsuyama Y, Ohe K. Analysis of factors affecting operating time,  
21 postoperative complications, and length of stay for total knee arthroplasty: nationwide web-based  
22 survey. *Journal of Orthopaedic Science*. 2009;14(1):10-6.  
23 84. Zhang Z-j, Kang Y, Zhang Z-q, Yang Z-b, He A-s, Fu M, et al. The influence of body mass index  
24 on life quality and clinical improvement after total hip arthroplasty. *Journal of Orthopaedic Science*.  
25 2012;17(3):219-25.  
26 85. Dowsey MM, Choong PFM. Obesity is a major risk factor for prosthetic infection after  
27 primary hip arthroplasty. *Clinical Orthopaedics and Related Research*. 2008;466(1):153-8.  
28 86. McAlindon TE, Bannuru RR, Sullivan MC, Arden NK, Berenbaum F, Bierma-Zeinstra SM, et al.  
29 OARSJ guidelines for the non-surgical management of knee osteoarthritis. *Osteoarthritis and*  
30 *Cartilage*. 2014;22(3):363-88.  
31 87. Atukorala I, Makovey J, Lawler L, Messier SP, Bennell K, Hunter DJ. Is There a Dose-Response  
32 Relationship Between Weight Loss and Symptom Improvement in Persons With Knee Osteoarthritis?  
33 *Arthritis Care & Research*. 2016;68(8):1106-14.  
34  
35  
36  
37  
38  
39  
40  
41  
42  
43  
44  
45  
46  
47  
48  
49  
50  
51  
52  
53  
54  
55  
56  
57  
58  
59  
60

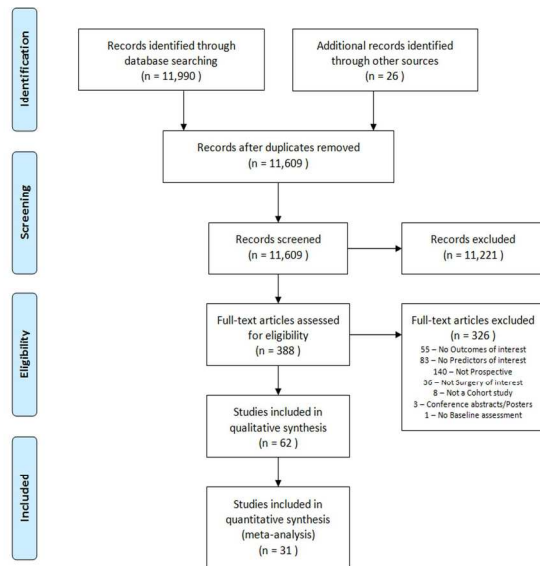

Figure 1. Flowchart of search strategy and screening steps.

254x142mm (300 x 300 DPI)

Review only

1  
2  
3  
4  
5  
6  
7  
8  
9  
10  
11  
12  
13  
14  
15  
16  
17  
18  
19  
20  
21  
22  
23  
24  
25  
26  
27  
28  
29  
30  
31  
32  
33  
34  
35  
36  
37  
38  
39  
40  
41  
42  
43  
44  
45  
46  
47  
48  
49  
50  
51  
52  
53  
54  
55  
56  
57  
58  
59  
60

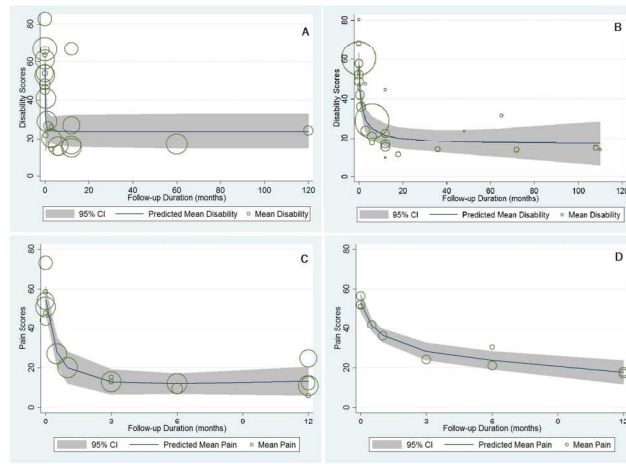

Figure 2 - Fractional polynomial analysis for hip (A) and knee (B) disability scores and hip (C) and knee (D) pain scores over time.

254x142mm (300 x 300 DPI)

Review only

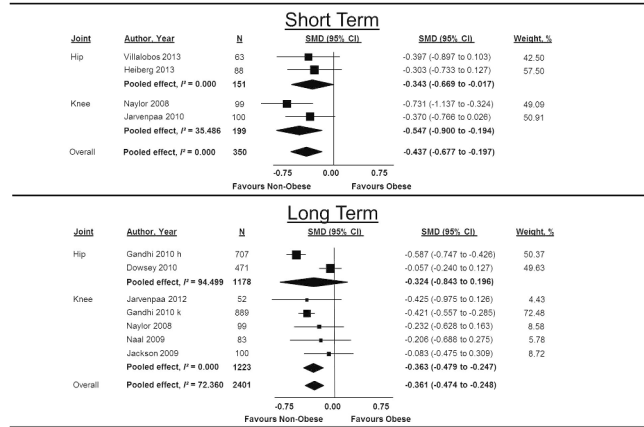

Figure 3 – Pooled standardised mean difference in pain at short and long term post-surgery between obese and non-obese patients.

254x142mm (300 x 300 DPI)

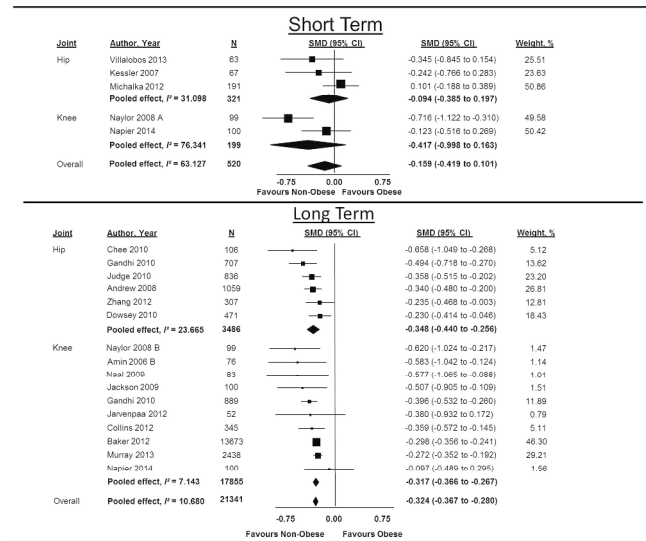

Figure 4 – Pooled standardised mean difference in disability at short and long term post-surgery between obese and non-obese patients.

254x142mm (300 x 300 DPI)

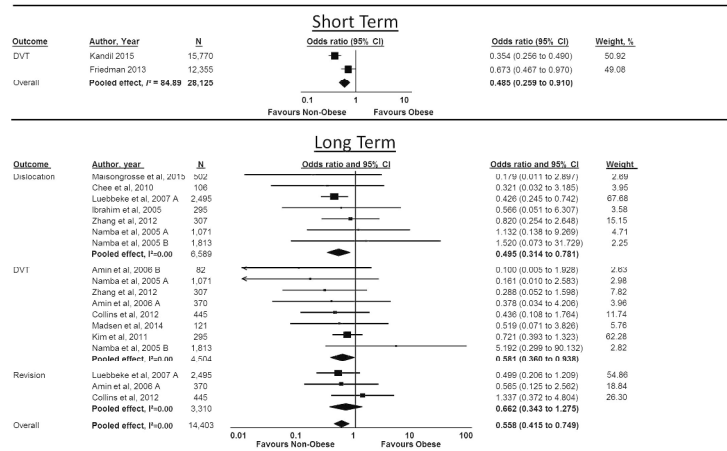

Figure 5 – Pooled association between complications and obesity at short term and long term follow-ups.

254x142mm (300 x 300 DPI)



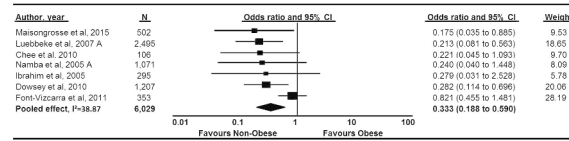

Figure 6 – Pooled association between post-surgical infections and obesity for hip surgery.

254x142mm (300 x 300 DPI)

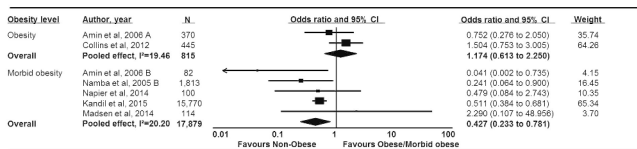

Figure 7 – Pooled association of post-surgical infections for knee surgery.\*

254x142mm (300 x 300 DPI)

## APPENDIX 1

## MEDLINE search strategy terms used:

|    |                                                                                                                                                                                                                                         |                  |
|----|-----------------------------------------------------------------------------------------------------------------------------------------------------------------------------------------------------------------------------------------|------------------|
| 1  | obesity.mp. or exp Obesity/ or exp Obesity, Abdominal/                                                                                                                                                                                  | 197.941          |
| 2  | Physical Activity.mp. or exp Motor Activity/                                                                                                                                                                                            | 231.947          |
| 3  | sedentar\$.mp.                                                                                                                                                                                                                          | 19.058           |
| 4  | (time adj5 sitting).mp. [mp=title, abstract, original title, name of substance<br>word, subject heading word, keyword heading word, protocol supplementary<br>concept word, rare disease supplementary concept word, unique identifier] | 688              |
| 5  | <b>1 or 2 or 3 or 4</b>                                                                                                                                                                                                                 | <b>414.967</b>   |
| 6  | exp Postoperative Complications/ or exp Hip Prosthesis/ or exp Arthroplasty,<br>Replacement, Hip/ or hip arthroplasty.mp. or exp Osteoarthritis, Hip/ or exp<br>Hip Joint/                                                              | 469.282          |
| 7  | knee arthroplasty.mp. or exp Arthroplasty, Replacement, Knee/                                                                                                                                                                           | 17.365           |
| 8  | exp Elective Surgical Procedures/ or elective surgery.mp.                                                                                                                                                                               | 14.058           |
| 9  | osteoarthritis.mp. or exp Osteoarthritis, Hip/ or exp Osteoarthritis/ or exp<br>Osteoarthritis, Knee/                                                                                                                                   | 55.493           |
| 10 | exp Osteonecrosis/ or Osteonecrosis.mp.                                                                                                                                                                                                 | 13.961           |
| 11 | arthroplasty.mp. or exp Arthroplasty, Replacement, Knee/ or exp Arthroplasty,<br>Replacement/ or exp Arthroplasty/ or exp Arthroplasty, Replacement, Hip/                                                                               | 53.979           |
| 12 | <b>6 or 7 or 8 or 9 or 10 or 11</b>                                                                                                                                                                                                     | <b>546.616</b>   |
| 13 | exp Cohort Studies/ or cohort.mp.                                                                                                                                                                                                       | 1.526.984        |
| 14 | incidence.mp. or exp Incidence/                                                                                                                                                                                                         | 587.274          |
| 15 | exp Follow-Up Studies/ or follow-up.mp.                                                                                                                                                                                                 | 912.064          |
| 16 | prognosis.mp. or exp Prognosis/                                                                                                                                                                                                         | 1.273.869        |
| 17 | exp Prognosis/ or predictors.mp.                                                                                                                                                                                                        | 1.258.014        |
| 18 | exp Time Factors/ or course.mp.                                                                                                                                                                                                         | 1.403.404        |
| 19 | exp Survival Analysis/ or exp Survival/ or exp Survival Rate/ or survival.mp.                                                                                                                                                           | 843.771          |
| 20 | logistic.mp.                                                                                                                                                                                                                            | 198.801          |
| 21 | cox.mp.                                                                                                                                                                                                                                 | 84.820           |
| 22 | life table.mp. or exp Life Tables/                                                                                                                                                                                                      | 18.098           |
| 23 | log rank.mp. or exp Follow-Up Studies/                                                                                                                                                                                                  | 533.280          |
| 24 | <b>13 or 14 or 15 or 16 or 17 or 18 or 19 or 20 or 21 or 22 or 23</b>                                                                                                                                                                   | <b>4.460.132</b> |
| 25 | Animals/                                                                                                                                                                                                                                | 5.495.334        |
| 26 | exp Editorial/ or editorial.mp.                                                                                                                                                                                                         | 376.114          |
| 27 | case report.mp. or exp Case Reports/                                                                                                                                                                                                    | 1.754.352        |
| 28 | letter.mp. or exp Letter/                                                                                                                                                                                                               | 895.420          |
| 29 | 25 or 26 or 27 or 28                                                                                                                                                                                                                    | 8.184.015        |
| 30 | <b>5 and 12 and 24</b>                                                                                                                                                                                                                  | <b>7.601</b>     |
| 31 | <b>30 not 29</b>                                                                                                                                                                                                                        | <b>6.869</b>     |

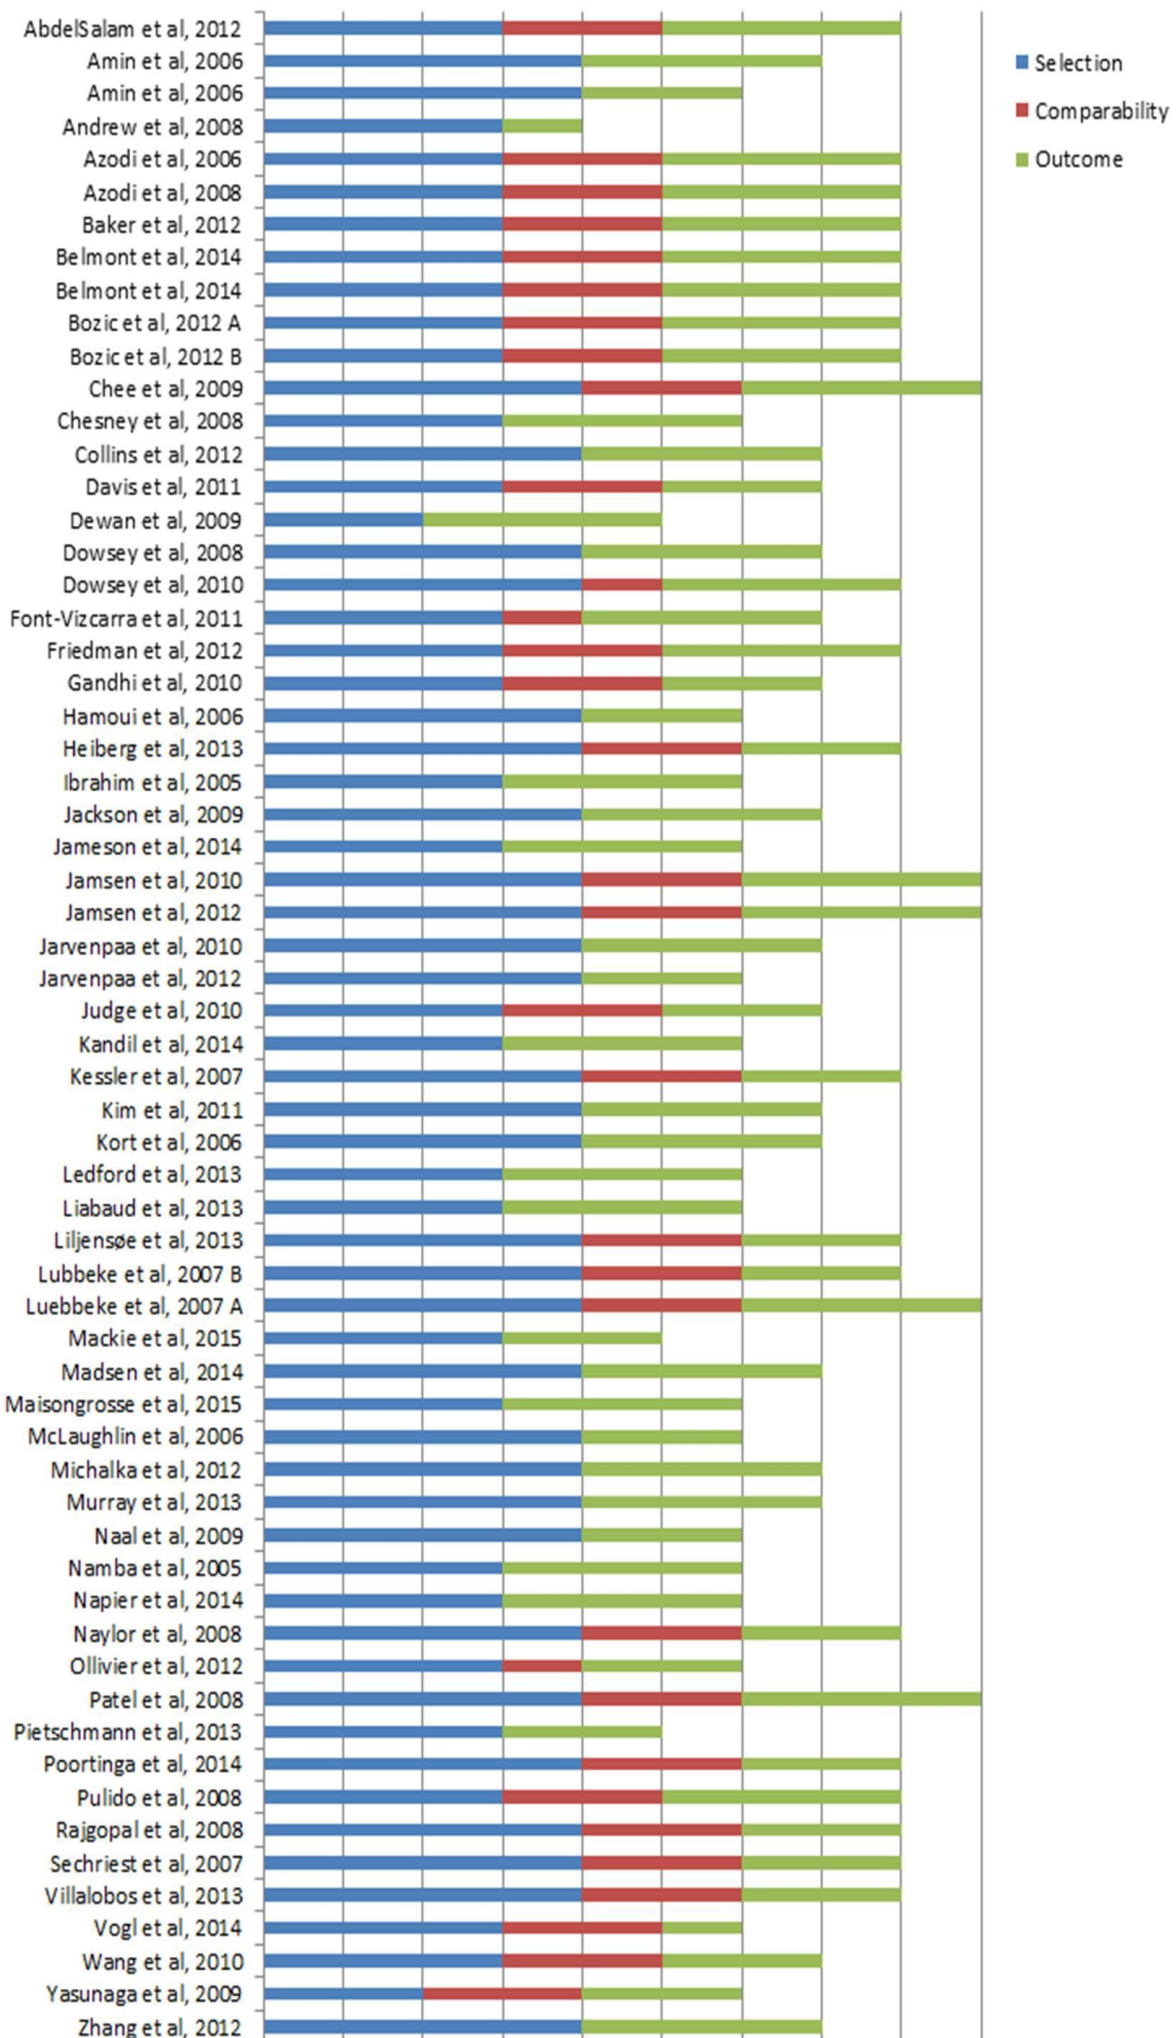

1  
2  
3  
4  
5  
6  
7  
8  
9  
10  
11  
12  
13  
14  
15  
16  
17  
18  
19  
20  
21  
22  
23  
24  
25  
26  
27  
28  
29  
30  
31  
32  
33  
34  
35  
36  
37  
38  
39  
40  
41  
42  
43  
44  
45  
46

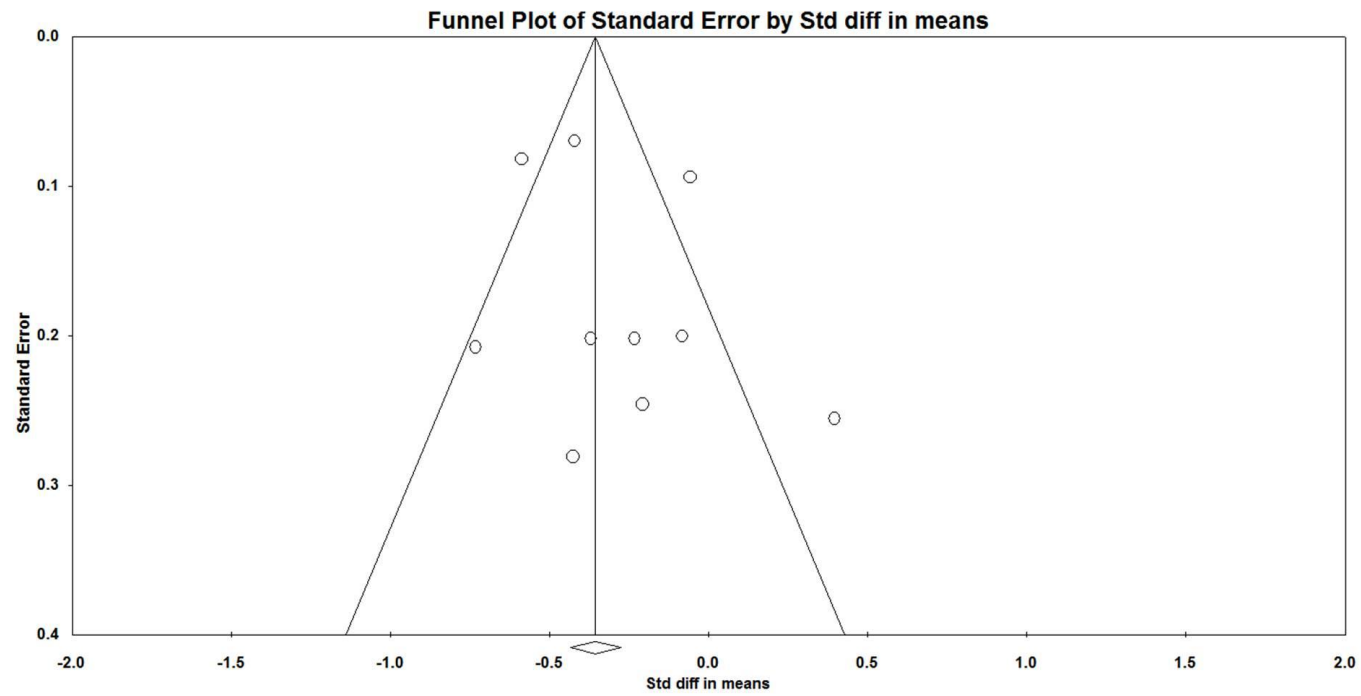

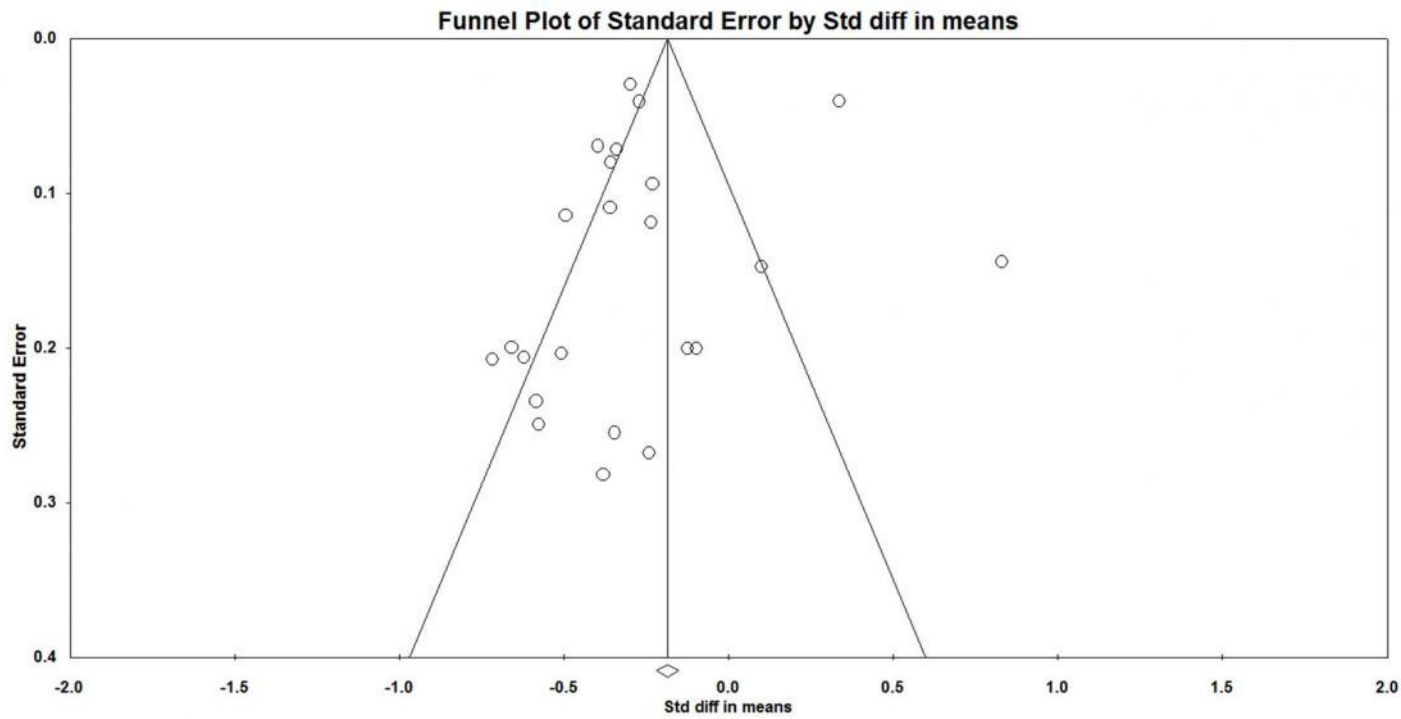

1  
2  
3  
4  
5  
6  
7  
8  
9  
10  
11  
12  
13  
14  
15  
16  
17  
18  
19  
20  
21  
22  
23  
24  
25  
26  
27  
28  
29  
30  
31  
32  
33  
34  
35  
36  
37  
38  
39  
40  
41  
42  
43  
44  
45  
46

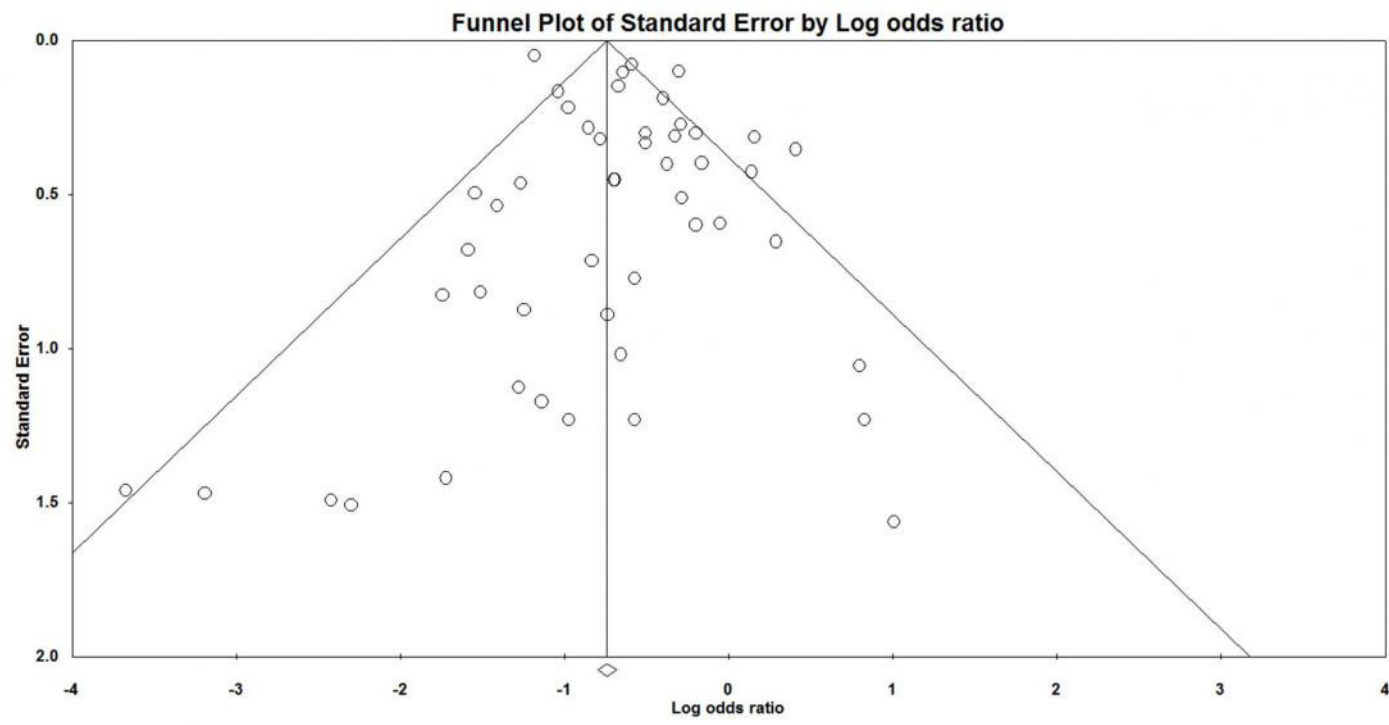

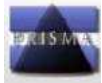

# PRISMA 2009 Checklist

| Section/topic                      | #  | Checklist item                                                                                                                                                                                                                                                                                              | Reported on page # |
|------------------------------------|----|-------------------------------------------------------------------------------------------------------------------------------------------------------------------------------------------------------------------------------------------------------------------------------------------------------------|--------------------|
| <b>TITLE</b>                       |    |                                                                                                                                                                                                                                                                                                             |                    |
| Title                              | 1  | Identify the report as a systematic review, meta-analysis, or both.                                                                                                                                                                                                                                         | 1                  |
| <b>ABSTRACT</b>                    |    |                                                                                                                                                                                                                                                                                                             |                    |
| Structured summary                 | 2  | Provide a structured summary including, as applicable: background; objectives; data sources; study eligibility criteria, participants, and interventions; study appraisal and synthesis methods; results; limitations; conclusions and implications of key findings; systematic review registration number. | 2                  |
| <b>INTRODUCTION</b>                |    |                                                                                                                                                                                                                                                                                                             |                    |
| Rationale                          | 3  | Describe the rationale for the review in the context of what is already known.                                                                                                                                                                                                                              | 4                  |
| Objectives                         | 4  | Provide an explicit statement of questions being addressed with reference to participants, interventions, comparisons, outcomes, and study design (PICOS).                                                                                                                                                  | 5                  |
| <b>METHODS</b>                     |    |                                                                                                                                                                                                                                                                                                             |                    |
| Protocol and registration          | 5  | Indicate if a review protocol exists, if and where it can be accessed (e.g., Web address), and, if available, provide registration information including registration number.                                                                                                                               | 5                  |
| Eligibility criteria               | 6  | Specify study characteristics (e.g., PICOS, length of follow-up) and report characteristics (e.g., years considered, language, publication status) used as criteria for eligibility, giving rationale.                                                                                                      | 5-6                |
| Information sources                | 7  | Describe all information sources (e.g., databases with dates of coverage, contact with study authors to identify additional studies) in the search and date last searched.                                                                                                                                  | 5                  |
| Search                             | 8  | Present full electronic search strategy for at least one database, including any limits used, such that it could be repeated.                                                                                                                                                                               | Appendix 1         |
| Study selection                    | 9  | State the process for selecting studies (i.e., screening, eligibility, included in systematic review, and, if applicable, included in the meta-analysis).                                                                                                                                                   | 8                  |
| Data collection process            | 10 | Describe method of data extraction from reports (e.g., piloted forms, independently, in duplicate) and any processes for obtaining and confirming data from investigators.                                                                                                                                  | 6                  |
| Data items                         | 11 | List and define all variables for which data were sought (e.g., PICOS, funding sources) and any assumptions and simplifications made.                                                                                                                                                                       | 6-8                |
| Risk of bias in individual studies | 12 | Describe methods used for assessing risk of bias of individual studies (including specification of whether this was done at the study or outcome level), and how this information is to be used in any data synthesis.                                                                                      | 7                  |
| Summary measures                   | 13 | State the principal summary measures (e.g., risk ratio, difference in means).                                                                                                                                                                                                                               | 7-8                |
| Synthesis of results               | 14 | Describe the methods of handling data and combining results of studies, if done, including measures of consistency (e.g., $I^2$ ) for each meta-analysis.                                                                                                                                                   | 7-8                |



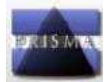

# PRISMA 2009 Checklist

Page 1 of 2

| Section/topic                 | #  | Checklist item                                                                                                                                                                                           | Reported on page # |
|-------------------------------|----|----------------------------------------------------------------------------------------------------------------------------------------------------------------------------------------------------------|--------------------|
| Risk of bias across studies   | 15 | Specify any assessment of risk of bias that may affect the cumulative evidence (e.g., publication bias, selective reporting within studies).                                                             | 8                  |
| Additional analyses           | 16 | Describe methods of additional analyses (e.g., sensitivity or subgroup analyses, meta-regression), if done, indicating which were pre-specified.                                                         | 7                  |
| <b>RESULTS</b>                |    |                                                                                                                                                                                                          |                    |
| Study selection               | 17 | Give numbers of studies screened, assessed for eligibility, and included in the review, with reasons for exclusions at each stage, ideally with a flow diagram.                                          | 8                  |
| Study characteristics         | 18 | For each study, present characteristics for which data were extracted (e.g., study size, PICOS, follow-up period) and provide the citations.                                                             | 10-13              |
| Risk of bias within studies   | 19 | Present data on risk of bias of each study and, if available, any outcome level assessment (see item 12).                                                                                                | 9                  |
| Results of individual studies | 20 | For all outcomes considered (benefits or harms), present, for each study: (a) simple summary data for each intervention group (b) effect estimates and confidence intervals, ideally with a forest plot. | 14                 |
| Synthesis of results          | 21 | Present results of each meta-analysis done, including confidence intervals and measures of consistency.                                                                                                  | 14-20              |
| Risk of bias across studies   | 22 | Present results of any assessment of risk of bias across studies (see Item 15).                                                                                                                          | 10-13              |
| Additional analysis           | 23 | Give results of additional analyses, if done (e.g., sensitivity or subgroup analyses, meta-regression [see Item 16]).                                                                                    | 19                 |
| <b>DISCUSSION</b>             |    |                                                                                                                                                                                                          |                    |
| Summary of evidence           | 24 | Summarize the main findings including the strength of evidence for each main outcome; consider their relevance to key groups (e.g., healthcare providers, users, and policy makers).                     | 20-21              |
| Limitations                   | 25 | Discuss limitations at study and outcome level (e.g., risk of bias), and at review-level (e.g., incomplete retrieval of identified research, reporting bias).                                            | 21-23              |
| Conclusions                   | 26 | Provide a general interpretation of the results in the context of other evidence, and implications for future research.                                                                                  | 22                 |
| <b>FUNDING</b>                |    |                                                                                                                                                                                                          |                    |
| Funding                       | 27 | Describe sources of funding for the systematic review and other support (e.g., supply of data); role of funders for the systematic review.                                                               | 24                 |

From: Moher D, Liberati A, Tetzlaff J, Altman DG, The PRISMA Group (2009). Preferred Reporting Items for Systematic Reviews and Meta-Analyses: The PRISMA Statement. PLoS Med 6(7): e1000097. doi:10.1371/journal.pmed1000097

For more information, visit: [www.prisma-statement.org](http://www.prisma-statement.org).

Page 2 of 2

For peer review only - <http://bmjopen.bmj.com/site/about/guidelines.xhtml>

# BMJ Open

## Can obesity and physical activity predict outcomes of elective knee or hip surgery due to osteoarthritis? – A meta-analysis of cohort studies.

|                                 |                                                                                                                                                                                                                                                                                                                                                                                              |
|---------------------------------|----------------------------------------------------------------------------------------------------------------------------------------------------------------------------------------------------------------------------------------------------------------------------------------------------------------------------------------------------------------------------------------------|
| Journal:                        | <i>BMJ Open</i>                                                                                                                                                                                                                                                                                                                                                                              |
| Manuscript ID                   | bmjopen-2017-017689.R2                                                                                                                                                                                                                                                                                                                                                                       |
| Article Type:                   | Research                                                                                                                                                                                                                                                                                                                                                                                     |
| Date Submitted by the Author:   | 14-Nov-2017                                                                                                                                                                                                                                                                                                                                                                                  |
| Complete List of Authors:       | Pozzobon, Daniel; University of Sydney - Camperdown and Darlington Campus, Rheumatology<br>Ferreira, Paulo; University of Sydney, Faculty of Health Science<br>Blyth, Fiona; University of Sydney, Concord Hospital<br>Machado, Gustavo; University of Sydney - Camperdown and Darlington Campus<br>Ferreira, Manuela; University of Sydney - Camperdown and Darlington Campus, Rheumatology |
| <b>Primary Subject Heading</b>: | Rheumatology                                                                                                                                                                                                                                                                                                                                                                                 |
| Secondary Subject Heading:      | Public health, Epidemiology, Surgery                                                                                                                                                                                                                                                                                                                                                         |
| Keywords:                       | RHEUMATOLOGY, Hip < ORTHOPAEDIC & TRAUMA SURGERY, Knee < ORTHOPAEDIC & TRAUMA SURGERY, Surgical pathology < PATHOLOGY                                                                                                                                                                                                                                                                        |
|                                 |                                                                                                                                                                                                                                                                                                                                                                                              |

SCHOLARONE™  
Manuscripts

only

1  
2  
3 **Can obesity and physical activity predict outcomes of elective knee**  
4 **or hip surgery due to osteoarthritis? – A meta-analysis of cohort**  
5 **studies.**  
6  
7  
8  
9

10  
11 Daniel Pozzobon<sup>1</sup>, Paulo H Ferreira<sup>2</sup>, Fiona M Blyth<sup>3</sup>, Gustavo C Machado<sup>4</sup>, Manuela L  
12 Ferreira<sup>1</sup>  
13  
14

15  
16 <sup>1</sup> Institute of Bone and Joint Research, The Kolling Institute, Sydney Medical School,  
17 University of Sydney, Sydney, NSW  
18

19  
20 <sup>2</sup> Discipline of Physiotherapy, Faculty of Health Sciences, University of Sydney, Sydney, NSW  
21

22 <sup>3</sup> Concord Clinical School, University of Sydney, Sydney, NSW  
23

24 <sup>4</sup> School of Public Health, The University of Sydney, Sydney, NSW  
25

26 Department of Gynaecology and Obstetrics, Botucatu Medical School, UNESP – Univ  
27 Estadual Paulista, Botucatu, São Paulo, Brazil  
28  
29

30  
31  
32  
33  
34 Correspondence to: D. Pozzobon, Royal North Shore Hospital, Department of  
35 Rheumatology, 7C – Clinical Administration, St Leonards, NSW 2065, Australia  
36 (dpoz5597@uni.sydney.edu.au, ph 0404 967 756).  
37  
38

39  
40  
41 Word count: 3,799.  
42  
43  
44  
45  
46  
47  
48  
49  
50  
51  
52  
53  
54  
55  
56  
57  
58  
59  
60

## Abstract

**Objective:** The aim of this study was to systematically review the literature to identify whether obesity or the regular practice of physical activity are predictors of clinical outcomes in patients undergoing elective hip and knee arthroplasty due to osteoarthritis.

**Design:** Systematic review and meta-analysis.

**Data Source and eligibility criteria:** A systematic search was performed on the Medline, CINAHL, EMBASE, and Web of Science electronic databases. Longitudinal cohort studies were included in the review. To be included, studies needed to have assessed the association between obesity or physical activity participation at baseline and clinical outcomes (i.e. pain, disability, and adverse events) following hip or knee arthroplasty.

**Data extraction:** Two independent reviewers extracted data on pain, disability, quality of life, obesity, physical activity and any post-surgical complications.

**Results:** 63 full papers were included in this systematic review. From these, 31 were included in the meta-analyses. Our meta-analysis showed that non-obese participants tended to suffer less pain at both short (SMD -0.43; 95%CI: -0.67 to -0.19;  $p < 0.001$ ) and long term (SMD -0.36; 95%CI: -0.47 to -0.24;  $p < 0.001$ ), less disability at long term (SMD -0.32; 95%CI: -0.36 to -0.28;  $p < 0.001$ ) and report fewer post-surgical complications at short (OR: 0.48; 95% CI: 0.25 to 0.91;  $p < 0.001$ ) and long term (OR: 0.55; 95% CI: 0.41 to 0.74;  $p < 0.001$ ) and less post-surgical infections after hip arthroplasty (OR: 0.33; 95% CI: 0.18 to 0.59;  $p < 0.001$ ), and particularly when compared to morbidly obese participants after knee arthroplasty (OR: 0.42; 95% CI: 0.23 to 0.78;  $p = 0.006$ ).

**Conclusions:** Pre-surgical obesity is associated with worse clinical outcomes of hip or knee arthroplasty in terms of pain, disability, and complications in patients with osteoarthritis. No impact of physical activity participation has been observed.

**Systematic review registration:** PROSPERO registration CRD42016032711.

**Keywords:** Physical activity, obesity, arthroplasty, osteoarthritis, knee, hip, meta-analysis.

**Strengths and limitations of this study**

- The current review is the most comprehensive systematic review on the topic to date.
- The current review is the first review to use a quantitative approach to synthesize the results of pain, disability and surgical complications between non-obese and obese participants who underwent hip or knee arthroplasty due to osteoarthritis.
- The methodological quality of the included studies was in general poor.
- There was a substantial variability of follow-up duration across studies, ranging from 2 weeks to 11 years.

## Introduction

Musculoskeletal pain, including pain from knee and hip osteoarthritis, is the leading cause of physical disability in the world and responsible for an increasing burden to patients and society.[1] This problem will increase over time, as the world population ages and physical disability resulting from declining health becomes increasingly prevalent.[2] The global health care expenditure for knee and hip osteoarthritis is substantial, and most of these costs are incurred by surgical management and associated hospital care.[3] For instance, in the UK the direct costs of osteoarthritis were estimated at more than £1 billion in 2010, of which £850 million was spent just on surgical procedures.[4]

Although management of the early stages of this condition consists of a combination of nonpharmacological and pharmacological therapies (e.g. anti-inflammatory and analgesic drugs), surgery has become the most common treatment option for severe cases, especially when nonsurgical therapies fail to provide sufficient pain relief.[5] Osteotomy, mosaicplasty, and arthroplasty are some of the existing types of surgery used to manage osteoarthritis of the hip and knee; with total or partial arthroplasty being the most commonly recommended.[6]

There are multiple risk factors for the development of knee OA. Among the most common of these are increased body weight and muscle weakness; often attributed to a sedentary lifestyle.[7] Obesity and sedentary lifestyle behaviour have also been associated with serious health conditions such as: coronary heart disease, type 2 diabetes, breast and colon cancers, and decreased life expectancy.[8] Although there is evidence for the role of obesity and physical inactivity in health conditions and quality of life in general,[9, 10] the actual impact of these factors, together or in isolation, on the outcomes of elective surgery of the knee and hip is still controversial.[11, 12] Although previous attempts to systematically review the literature have been made, these studies[13-15] have either failed to perform a quantitative summary of the evidence (i.e. meta-analysis), have excluded patients undergoing knee arthroplasty,[16] or have excluded pain outcomes.[13] No meta-analyses have been performed considering obesity and physical activity as predictors of surgical outcomes in terms of pain, disability, quality of life and complications after hip or knee arthroplasty for end stage osteoarthritis.

1  
2  
3 Identifying whether obesity and physical activity participation predict surgical outcomes in  
4 patients with knee and hip osteoarthritis will inform clinical practice in terms of prognosis  
5 and safety of an increasingly prevalent treatment approach. We have conducted a meta-  
6 analysis of cohort studies aiming to quantify the role of obesity and physical activity  
7 participation as predictors of clinical outcomes in terms of pain, disability, quality of life, and  
8 post-surgical complications. This review and meta-analysis focused on patients with knee  
9 and hip osteoarthritis undergoing hip or knee arthroplasty.  
10  
11  
12  
13  
14  
15

## 16 **Methods**

### 17 *Data sources and searches*

18 We conducted a systematic review following the PRISMA statement.[17] This review was  
19 prospectively registered on PROSPERO, registration number CRD42016032711. A systematic  
20 electronic search was performed in the following databases from inception to January 2017:  
21 MEDLINE, EMBASE, CINAHL, and Web of Science. We used a combination of relevant  
22 keywords to construct the search strategy including obesity, physical activity, knee  
23 osteoarthritis, hip osteoarthritis, arthroplasty, and elective surgery (appendix 1). The first  
24 screening of potentially relevant records was conducted by one author (DP) based on titles  
25 and abstract, and two authors (DP and GM) independently performed the final selection of  
26 included trials based on full-text evaluation. A third reviewer arbitrated in case of  
27 disagreement (MF). Moreover, the reference lists of included studies were checked for  
28 potential studies. An additional 26 references were screened, but none met our inclusion  
29 criteria. No restriction was applied on language.  
30  
31  
32  
33  
34  
35  
36  
37  
38  
39  
40  
41

### 42 *Study selection*

43 We included only longitudinal studies assessing the role of obesity or physical activity  
44 participation on the clinical outcomes following partial or total hip arthroplasty (THA) or  
45 partial or total knee arthroplasty (TKA) surgery. Clinical outcomes were defined in terms of  
46 pain, disability, quality of life, and complications post arthroplasty. To be eligible, studies  
47 had to be full reports; include participants who underwent elective arthroplasty of the hip  
48 or knee due to osteoarthritis; include data of pre-surgical and at least one post-surgical  
49 assessment of the clinical outcomes of interest; and assess the association between the  
50 predictors and outcomes of interest. Obesity and physical activity participation had to be  
51  
52  
53  
54  
55  
56  
57  
58  
59  
60

1  
2  
3 assessed at baseline. Studies on revision surgery were excluded. Studies were not excluded  
4 based on intensity or duration of symptoms.  
5  
6

### 7 8 *Data extraction*

9  
10 Using a standardised form, data on study characteristics, predictors and outcome measures  
11 of interest were independently extracted from the included studies by two reviewers (DP  
12 and GM). A third author (MF) resolved any disagreement. Estimates of association between  
13 predictors and outcomes of interest were extracted as presented in each study and included  
14 odds ratios, risk ratios, correlations, mean differences or regression coefficients. When  
15 studies reported more than one tool regarding the same topic (e.g. WOMAC, HOOS, OHS,  
16 KOOS, KSS), estimates were extracted from the group with the largest sample size.  
17

18 We contacted the authors to provide further information when there were insufficient data  
19 reported in the manuscript. When authors were unavailable we estimated data using the  
20 recommendations in the Cochrane Handbook for Systematic Reviews of Interventions.[18]  
21  
22  
23  
24  
25  
26

### 27 28 *Outcome measures*

29  
30 Data on pain intensity was extracted as visual analogue scale (VAS) scores ranging from 0 to  
31 10 and measured directly or as part of the following measurement tools: the Western  
32 Ontario and McMaster Universities Osteoarthritis Index (WOMAC), the Hip disability and  
33 Osteoarthritis Outcome Score (HOOS), the Knee disability and Osteoarthritis Outcome Score  
34 (KOOS) or the Harris Hip Score (HHS). If studies reported more than one measure of pain  
35 intensity or disability for the cohort, the most severe measure at baseline was included in  
36 the pooled analyses. Disability measures included the Oxford Hip Score (OHS), ranging from  
37 12 to 60 being 12 the best result; Oxford Knee Score (OKS) ranging from 0 to 60 being 60 the  
38 best result; the Harris Hip Score (HHS) ranging from 0 to 100 being 100 the best result; Knee  
39 Society Score (KSS) ranging from 0 to 100 being 100 the best result; WOMAC total score  
40 ranging from 0 to 96 being 0 the best result; or WOMAC function subscale, ranging from 0  
41 to 10 being 10 the best result; and were converted into a uniform 0-100 scale where 0  
42 meant less disability. Extracted data on complications included any descriptive measure of  
43 the number of complications or number of patients with a complication reported during the  
44 study. Only two of the screened studies had reported specific raw data on quality of life  
45  
46  
47  
48  
49  
50  
51  
52  
53  
54  
55  
56  
57  
58  
59  
60



1  
2  
3 among the participants after joint arthroplasty, but due to differences in follow-up length,  
4 any meta-analysis made by merging this data would result in an unreliable measure.  
5  
6  
7

### 8 *Methodological Quality Assessment*

9  
10 The methodological quality of included studies was assessed by two independent reviewers  
11 using the Newcastle-Ottawa Scale (NOS)[19] recommended by the Cochrane  
12 Collaboration.[18] The NOS consists of eight items grouped into 3 categories, namely:  
13 selection, comparability, and outcome. A star system, ranging from zero to nine stars, is  
14 used to classify the quality of the study being reviewed (the more stars the study receives in  
15 each category, the higher its methodological quality). After the independent assessment of  
16 included studies by the leading author, each study received the following categorical score  
17 representing its quality: good (3 or 4 stars in selection domain AND 1 or 2 stars in  
18 comparability domain AND 2 or 3 stars in outcome domain), fair (2 stars in selection domain  
19 AND 1 or 2 stars in comparability domain AND 2 or 3 stars in outcome domain) or poor (0 or  
20 1 star in selection domain OR 0 stars in comparability domain OR 0 or 1 star in outcome  
21 domain). A third reviewer (MF) resolved any disagreement between independent assessors.  
22  
23  
24  
25  
26  
27  
28  
29  
30  
31  
32

### 33 *Data analysis*

34 Data on baseline (i.e. pre-surgical scores) and postoperative outcome scores were weighed  
35 by the inverse study variance and used in fractional polynomial regression modelling to  
36 build graphs depicting the course of pain and disability over time. STATA14 was used for the  
37 analyses (Stata Corp LP, College Station, TX).[20]  
38  
39  
40  
41  
42

43 Meta-analyses were performed to assess the differences in pain, disability and  
44 complications post-surgery, between predictor groups (i.e. obese and non-obese groups as  
45 defined by included studies), using a random effects model. When possible, different  
46 analyses were performed for knee and hip arthroplasty and also for different levels of  
47 obesity (i.e. obesity and morbid obesity). When means and standard deviations of outcomes  
48 of interest were presented for multiple predictor groups in the same study (i.e. underweight  
49 (BMI<18), normal weight (BMI≥18<25), overweight (BMI≥25<30), and obese levels I  
50 (BMI≥30<35), II (BMI≥35<40) or III (BMI≥40)) these were combined into two groups (non-  
51  
52  
53  
54  
55  
56  
57  
58  
59  
60

1  
2  
3 obese: BMI<30 and obese: BMI≥30) as recommended in the Cochrane Handbook for  
4 Systematic Reviews of Interventions[18] before inclusion in the pooled analyses. Results  
5 were reported as standardised mean differences (SMD) and 95% confidence intervals  
6 (95%CI). Between-study heterogeneity was calculated using  $I^2$  ( $I^2 < 25\%$ : small heterogeneity;  
7  $25\% < I^2 < 75\%$ : moderate heterogeneity;  $I^2 > 75\%$ : large heterogeneity).[21] We have defined  
8 a standardised mean difference (SMD) of 0.2 as small difference, 0.5 as moderate difference  
9 and 0.8 as large difference.[22]  
10  
11  
12  
13  
14  
15

16 Assessment of publication bias was performed using funnel plots. The precision (i.e.  
17 standard error) of included studies was plotted against the difference in outcomes between  
18 groups (i.e. obese or non-obese) and results visually analysed. In the absence of publications  
19 bias or small study bias, smaller studies should be evenly spread around the base of the  
20 funnel, whilst the larger studies should be concentrated around the top of the funnel. Plot  
21 asymmetry was also quantified using the Egger's tests, for which a null hypothesis  
22 represents symmetry of plotted data.[23]  
23  
24  
25  
26  
27  
28

29 All meta-analyses were conducted using Comprehensive Meta-Analysis software  
30 (Comprehensive Meta-Analysis, Englewood, NJ). For studies not reporting enough data to  
31 be included in the meta-analyses, the reported individual associations were tabulated and  
32 qualitatively presented on tables 2, 3, 4 and 5.  
33  
34  
35  
36  
37

## 38 Results

39 Our search strategy identified 11,990 studies. After removing 381 duplicates, 11,220 studies  
40 were screened and excluded based on keywords, titles, and abstracts. All the remaining 389  
41 studies were written in English and were assessed by reading the full text, of which 327  
42 were then excluded, yielding 62 studies to be included in the systematic review.[24-85]  
43 From these, 31 presented enough data to be included in at least one of the meta-analyses  
44 (Figure 1).  
45  
46  
47  
48  
49  
50  
51

52 **Figure 1** – Flowchart of search strategy and screening steps.  
53  
54  
55  
56  
57  
58  
59  
60

### *Included Studies*

Included studies reported data from 18 different countries: Australia,[40, 47, 72, 85] Canada,[38, 43, 78] China,[84] Denmark,[60] England,[27, 30] Finland,[49-52], France,[65, 73] Germany,[55, 75, 81] Italy,[28, 29] Japan,[83] Netherlands,[57, 76] Norway,[45] Scotland [25, 36], South Korea,[56] Spain,[41, 80] Switzerland,[61, 62, 69] United Kingdom[26, 35, 37, 46, 48, 53, 63, 67, 68, 71, 74] and USA.[24, 31-34, 39, 42, 44, 54, 58, 59, 64, 66, 70, 77, 79, 82] Demographic data from each study are presented in table 1.

### *Methodological Quality*

An overall quality assessment of the studies showed that 50% (n=31) of the included studies were considered as being of good methodological quality, whilst 1.5% (n=1) were considered fair and 48.5% (n=30) were considered of poor methodological quality. Of the screened studies, 56 (90%) had a follow-up rate of 80% or greater, and only half (n= 32 studies) assessed outcomes via retrospective analysis of medical records, conducted adjustment for potential confounders (e.g. age or sex) or investigated a representative sample of the population (Appendix 2).

### *Assessment of Publication Bias*

Inspection of funnel plots and results of Egger's test confirmed no evidence of small study bias for those studies included in our pooled analyses, with p values ranging from 0.07 to 0.43 (Appendix 3, 4 and 5).

**Table 1** - Included studies and characteristics.

| Author, year           | Country        | Sample Size | Predictor | Outcomes                     | Surgery                         | Follow-Up Duration          | Quality Score |
|------------------------|----------------|-------------|-----------|------------------------------|---------------------------------|-----------------------------|---------------|
| AbdelSalam et al, 2012 | USA            | 210         | Obesity   | Complications                | Total Hip and Knee Arthroplasty | 9 years                     | Fair          |
| Amin et al, 2006 A     | United Kingdom | 328         | Obesity   | Complications;<br>Disability | Total Knee Replacement          | 6, 18, 36 and 60 months     | Poor          |
| Amin et al, 2006 B     | Scotland       | 82          | Obesity   | Complications                | Total Knee Replacement          | 38.5 months                 | Poor          |
| Andrew et al, 2008     | England        | 1,059       | Obesity   | Complications;<br>Disability | Total Hip Arthroplasty          | 3, 12, 24, 36 and 60 months | Poor          |
| Azodi et al, 2006      | Italy          | 3,309       | Obesity   | Complications                | Total Hip Replacement           | 6 to 9 years                | Fair          |
| Azodi et al, 2008      | Italy          | 2,106       | Obesity   | Complications                | Total Knee Arthroplasty         | 2 years                     | Fair          |
| Baker et al, 2012      | England        | 13,673      | Obesity   | Complications;<br>Disability | Total Hip Arthroplasty          | 6 months                    | Fair          |
| Belmont et al, 2014    | USA            | 17,514      | Obesity   | Complications                | Total Knee Arthroplasty         | 1 month                     | Fair          |
| Belmont et al, 2014    | USA            | 15,321      | Obesity   | Complications                | Total Knee Arthroplasty         | 1 month                     | Fair          |
| Bozic et al, 2012 A    | USA            | 40,919      | Obesity   | Complications                | Total Hip Arthroplasty          | 10 years                    | Fair          |
| Bozic et al, 2012 B    | USA            | 83,011      | Obesity   | Complications                | Total Knee Arthroplasty         | 10 years                    | Fair          |
| Chee et al, 2010       | United Kingdom | 106         | Obesity   | Complications;<br>Disability | Total Hip Arthroplasty          | 6, 18, 36 and 60 months     | Good          |
| Chesney et al, 2008    | Scotland       | 1,278       | Obesity   | Complications                | Total Knee Arthroplasty         | 6, 18 and 60 months         | Poor          |
| Collins et al, 2012    | United Kingdom | 385         | Obesity   | Complications;<br>Disability | Total Knee Arthroplasty         | 6, 18 months, 3, 6, 9 years | Poor          |
| Davis et al, 2011      | Canada         | 931         | Obesity   | Pain                         | Total Hip and Knee Arthroplasty | 2 weeks, 1, 3, 6, 12 months | Fair          |

|                           |                |        |         |                                    |                           |                 |      |
|---------------------------|----------------|--------|---------|------------------------------------|---------------------------|-----------------|------|
| Dewan et al, 2009         | USA            | 220    | Obesity | Complications;<br>Disability       | Total Knee Arthroplasty   | 5.4 years       | Poor |
| Dowsey et al, 2008        | Australia      | 1,207  | Obesity | Complications                      | Hip Arthroplasty          | 1 year          | Poor |
| Dowsey et al, 2010        | Australia      | 471    | Obesity | Complications; Pain;<br>Disability | Total Hip Arthroplasty    | 1 year          | Good |
| Font-Vizcarra et al, 2011 | Spain          | 402    | Obesity | Complications                      | Total Hip Arthroplasty    | 3 months        | Fair |
| Friedman et al, 2013      | USA            | 12,355 | Obesity | Complications                      | Hip and Knee Arthroplasty | 2 months        | Poor |
| Gandhi et al, 2010        | Canada         | 1,224  | Obesity | Pain; Disability                   | Total Hip Arthroplasty    | 1 year          | Good |
| Hamoui et al, 2006        | USA            | 63     | Obesity | Disability                         | Total Knee Arthroplasty   | 11.3 years      | Poor |
| Heiberg et al, 2013       | Norway         | 64     | Obesity | Pain                               | Total Hip Arthroplasty    | 3 and 12 months | Good |
| Ibrahim et al, 2005       | United Kingdom | 343    | Obesity | Complications                      | Total Hip Arthroplasty    | 1 year          | Poor |
| Jackson et al, 2009       | Australia      | 100    | Obesity | Complications; Pain;<br>Disability | Total Knee Replacement    | 9.2 years       | Poor |
| Jameson et al, 2014       | United Kingdom | 5,535  | Obesity | Disability                         | Hip Arthroplasty          | 6 months        | Fair |
| Jamsen et al, 2010        | Finland        | 2,647  | Obesity | Complications                      | Total Knee Arthroplasty   | 1 year          | Good |
| Jamsen et al, 2012        | Finland        | 7,181  | Obesity | Complications                      | Total Knee Arthroplasty   | 1 year          | Good |
| Jarvenpaa et al, 2010     | Finland        | 100    | Obesity | Complications; Pain                | Total Knee Arthroplasty   | 3 months        | Poor |
| Jarvenpaa et al, 2012     | Finland        | 52     | Obesity | Pain; Disability                   | Total Knee Arthroplasty   | 10.8 years      | Poor |
| Judge et al, 2010         | United Kingdom | 908    | Obesity | Disability                         | Hip Replacement           | 1 year          | Poor |

|                          |                |        |         |                                 |                                    |                              |      |
|--------------------------|----------------|--------|---------|---------------------------------|------------------------------------|------------------------------|------|
| Kandil et al, 2015       | USA            | 15,770 | Obesity | Complications                   | Unicompartmental Knee Arthroplasty | 3 months                     | Poor |
| Kessler et al, 2007      | Germany        | 67     | Obesity | Disability                      | Total Hip Replacement              | 10 days and 3 months         | Good |
| Kim et al, 2011          | South Korea    | 227    | Obesity | Complications                   | Total Knee Arthroplasty            | 6 months                     | Poor |
| Kort et al, 2007         | Netherlands    | 46     | Obesity | Complications                   | Unicompartmental Knee Replacement  | 2 years                      | Poor |
| Ledford et al, 2014      | USA            | 316    | Obesity | Complications                   | Total Hip and Knee Arthroplasty    | 2 months                     | Poor |
| Liabaud et al, 2013      | USA            | 273    | Obesity | Complications                   | Total Knee Arthroplasty            | 3 and 12 months              | Poor |
| Liljensøe et al, 2013    | Denmark        | 197    | Obesity | Pain; Disability                | Total Knee Arthroplasty            | 4 years                      | Poor |
| Luebbeke et al, 2007 A   | Switzerland    | 2,495  | Obesity | Complications; Disability       | Total Hip Arthroplasty             | 5 years                      | Good |
| Luebbeke et al, 2007 B   | Switzerland    | 325    | Obesity | Disability                      | Total Hip Arthroplasty             | 5 years                      | Good |
| Mackie et al, 2015       | United Kingdom | 1,821  | Obesity | Complications; Pain; Disability | Total Knee Arthroplasty            | 1 year                       | Poor |
| Madsen et al, 2014       | USA            | 79     | Obesity | Complications                   | Total Knee Arthroplasty            | 10 years                     | Poor |
| Maisongrosse et al, 2014 | France         | 502    | Obesity | Complications                   | Total Hip Arthroplasty             | 58 months                    | Poor |
| McLaughlin et al, 2006   | USA            | 198    | Obesity | Complications                   | Total Hip Replacement              | 14.5 years                   | Poor |
| Michalka et al, 2012     | United Kingdom | 191    | Obesity | Complications; Pain; Disability | Hip Arthroplasty                   | 6 weeks                      | Poor |
| Murray et al, 2013       | United Kingdom | 2,438  | Obesity | Complications; Disability       | Unicompartmental Knee Replacement  | 1 year                       | Poor |
| Naal et al, 2009         | Switzerland    | 83     | Obesity | Pain; Disability                | Total Knee Arthroplasty            | 6 weeks, 3, 12 and 24 months | Poor |
| Namba et al, 2005        | USA            | 1,813  | Obesity | Complications                   | Total Hip and Knee Arthroplasty    | 1 year                       | Poor |

1  
2  
3  
4  
5  
6  
7  
8  
9  
10  
11  
12  
13  
14  
15  
16  
17  
18  
19  
20  
21  
22  
23  
24  
25  
26  
27  
28  
29  
30  
31  
32  
33  
34  
35  
36  
37  
38  
39  
40  
41  
42  
43  
44  
45  
46  
47

|                         |                |       |                      |                              |                                       |                                |      |
|-------------------------|----------------|-------|----------------------|------------------------------|---------------------------------------|--------------------------------|------|
| Napier et al, 2014      | United Kingdom | 100   | Obesity              | Complications;<br>Disability | Total Knee Arthroplasty               | 3 and 12 months                | Poor |
| Naylor et al, 2008      | Australia      | 99    | Obesity              | Pain                         | Total Hip and Knee Arthroplasty       | 2, 6, 12, 26 and<br>52 weeks   | Good |
| Ollivier et al, 2012    | France         | 210   | Physical<br>Activity | Disability                   | Total Hip Arthroplasty                | 10 years                       | Fair |
| Patel et al, 2008       | United Kingdom | 527   | Obesity              | Complications                | Total Knee Replacement                | 4 weeks, 6 weeks<br>and 1 year | Good |
| Pietschmann et al, 2013 | Germany        | 171   | Physical<br>Activity | Disability                   | Unicompartmental Knee<br>Arthroplasty | 4.2 years                      | Poor |
| Poortinga et al, 2014   | Netherlands    | 658   | Physical<br>Activity | Disability                   | Total Hip and Knee Arthroplasty       | 1 year                         | Good |
| Pulido et al, 2008      | USA            | 9,245 | Obesity              | Complications                | Total Hip and Knee Arthroplasty       | 1 year                         | Fair |
| Rajgopal et al, 2008    | Canada         | 760   | Obesity              | Complications;<br>Disability | Total Knee Arthroplasty               | 1 year                         | Fair |
| Sechriest et al, 2007   | USA            | 34    | Physical<br>Activity | Disability                   | Total Hip Arthroplasty                | 5 years                        | Poor |
| Villalobos et al, 2013  | Spain          | 63    | Obesity              | Pain; Disability             | Total Hip Arthroplasty                | 3 months                       | Good |
| Vogl et al, 2014        | Germany        | 281   | Obesity              | Disability                   | Total Hip Arthroplasty                | 6 months                       | Poor |
| Wang et al, 2010        | USA            | 97    | Obesity              | Disability                   | Total Hip Arthroplasty                | 3 months, 1 and<br>2 years     | Fair |
| Yasunaga et al, 2009    | Japan          | 3,577 | Obesity              | Complications                | Total Knee Arthroplasty               | 5 months                       | Fair |
| Zhang et al, 2012       | China          | 714   | Obesity              | Complications;<br>Disability | Total Hip Arthroplasty                | 5 years                        | Poor |

### The course of pain and disability over time

Figure 2 presents the course of disability over time for hip (A) and knee osteoarthritis (B) post-surgery; as well as pain for hip (C) and knee osteoarthritis (D). The central line represents the estimated pooled mean over time, and the shaded area circumscribes its 95% confidence intervals. A total of eight studies with complete data (i.e. estimates of central tendency and variance) were included in the pain analysis and 17 studies were included in the disability analysis.

The fractional polynomial regression model resulted in a pooled mean disability score and standard deviation before hip arthroplasty of 59.42 (SD: 10.94; n=5,250). At 12 months post-surgery it had decreased to a mean of 31.31 (SD: 24.28; n= 3,017) and a further reduction was observed at 120 months, when the mean disability score after hip arthroplasty was 24.32 (SD: 19.53; n= 210). For knee osteoarthritis, a pooled mean disability score of 56.88 (SD: 10.74; n= 17,225) was observed for patients undergoing arthroplasty. At 12 months after surgery this value decreased to 21.80 (SD: 13.51; n= 2,898), whilst at the 110-month follow-up, the mean disability score was 14.18 (SD: 0.77; n= 485). The pooled mean pain scores before hip arthroplasty was 54.86 (SD: 10.20; n= 2,517), decreasing to 13.76 (SD: 1.32; n= 1,058) 3 months after surgery, 10.8 (SD: 1.69; n= 1,212) at 6 months and slightly increasing to 13.45 (SD: 7.87; n= 2,173) at the 12 month follow-up. For patients undergoing knee arthroplasty, the pooled pain score at baseline was 57.78 (SD: 9.28; n= 2,211); which decreased to 25.67 (SD: 6.61; n= 1,222) at 6 months, and 14.18 (SD: 0.77; n= 1,820) at the 12-month follow-up (figure 2).

**Figure 2** - Fractional polynomial analysis for hip (A) and knee (B) disability scores and hip (C) and knee (D) pain scores over time.

### Association between obesity and post-surgical pain outcomes

Fourteen studies investigated the association between obesity and pain intensity in a total of 5,687 patients after hip or knee arthroplasty. Seven of the 14 studies presented enough data to be pooled in a meta-analysis. There was an overall moderate and statistically significant difference in post-surgical pain between obese and non-obese patients post



arthroplasty, with non-obese patients having better outcomes at short (SMD -0.43; 95%CI: -0.67 to -0.19;  $p<0.001$ ), and long-term timepoints (SMD -0.36; 95%CI: -0.47 to -0.24;  $p<0.001$ ). The pooled results for separate joints suggest non-obese participants have significantly less short-term (i.e. less than 6 months) post-surgical knee pain, compared to obese participants (SMD -0.54; 95%CI: -0.90 to -0.19;  $p=0.002$ ) and post-surgical hip pain (SMD -0.34; 95%CI: -0.66 to -0.01;  $p=0.039$ ). Obesity was defined as having a BMI over 30 kg/m<sup>2</sup>. At long term (i.e. 6 months or longer), there was a significant moderate difference between obese and non-obese groups in terms of knee pain (SMD -0.36; 95%CI: -0.47 to -0.24;  $p<0.001$ ), however there was no difference between groups for hip pain (SMD -0.32; 95%CI: -0.84 to 0.19;  $p=0.222$ )(figure 3). The results of individual studies not included in the pooled analyses are presented in table 2 below.

**Figure 3** – Pooled standardised mean difference in pain at short and long term post-surgery between obese and non-obese patients.

| Obesity vs Pain |                |                  |                                                                                                                                                                         |
|-----------------|----------------|------------------|-------------------------------------------------------------------------------------------------------------------------------------------------------------------------|
| Author, year    | BMI: Mean (SD) | Measure          | Results                                                                                                                                                                 |
| <b>Knee</b>     |                |                  |                                                                                                                                                                         |
| Davis 2011      | NA             | HOOS / KOOS      | After adjusting for age, gender, joint, and presence of back pain, an increased BMI was associated with worst pain outcomes ( $p<0.02$ ) at long term after THA or TKA. |
| Jarvenpaa 2010  | 29.7 (NA)      | VAS              | Increased BMI correlates significantly to VAS pain scale ( $r=0.236$ ; $p=0.018$ ) at short term after TKA.                                                             |
| Liljensøe 2013  | 30 (NA)        | SF-36            | BMI was <b>not</b> associated with SF-36 pain scale (OR= 0.96; $p=0.1$ ) at long term after TKA.                                                                        |
| Mackie 2015     | NA             | WOMAC            | Increased BMI was associated with less improvement in WOMAC pain scale ( $t= -2.64$ ; $p<0.001$ ) at long term after TKA.                                               |
| <b>Hip</b>      |                |                  |                                                                                                                                                                         |
| Dowsey 2010     | 29.55 (5.64)*  | Harris Hip Score | BMI was <b>not</b> associated with pain reduction ( $p=0.71$ ) at long term after THA.                                                                                  |
| Heiberg 2013    | 27 (6.27)*     | HOOS             | BMI was <b>not</b> associated with HOOS pain scale ( $p>0.05$ ) at short term after THA.                                                                                |

**Table 2** – Results of individual studies on the association between post-surgical pain and baseline obesity.

BMI – Body Mass Index; SD – Standard deviation; THA – Total hip arthroplasty; TKA – Total knee arthroplasty; OR – Odds ratio; NA – None available; WOMAC – Western Ontario and McMaster Universities Osteoarthritis Index; HOOS - Hip dysfunction and Osteoarthritis Outcome Score; KOOS - Knee dysfunction and Osteoarthritis Outcome Score; VAS – Visual Analogue Scale; SF-36 – Short Form 36 Questionnaire; \*Calculated following guidelines from Cochrane Handbook for Systematic Reviews of Interventions.

### Association between obesity and post-surgical disability outcomes

The impact of obesity on disability was investigated by 32 studies which compared post-surgery disability scores in 35,286 obese and non-obese participants. Of these, 19 studies presented complete data that was included in the pooled analysis. At short term, no statistically significant difference in overall disability between obese and non-obese participants was observed (SMD -0.15, 95% CI -0.41 to 0.10,  $p=0.231$ ). Likewise, no statistically significant difference was observed between obese and non-obese participants for post-surgical knee or hip disability (SMD -0.41, 95% CI -0.99 to 0.16,  $p=0.159$  and SMD -0.09, 95% CI -0.38 to 0.19,  $p=0.527$ , respectively).

At long term follow-up, however, there was an overall moderate and statistically significant difference in post-surgical disability between obese and non-obese patients regardless of the joint affected (SMD -0.32; 95%CI: -0.36 to -0.28;  $p<0.001$ ). That difference was still statistically significant and of moderate magnitude when knee and hip joints were analysed separately (SMD -0.31, 95% CI -0.36 to -0.26,  $p<0.001$  and SMD -0.34, 95% CI -0.44 to -0.25,  $p<0.001$ , respectively and favouring non-obese patients)(figure 4). The results of individual studies not included in the pooled analyses are presented in table 3 below.

**Figure 4** – Pooled standardised mean difference in disability at short and long term post-surgery between obese and non-obese patients.

| Obesity vs Disability |                |         |                                             |
|-----------------------|----------------|---------|---------------------------------------------|
| Author, year          | BMI: Mean (SD) | Measure | Results                                     |
| <b>Knee</b>           |                |         |                                             |
| Davis 2011            | NA             | WOMAC / | After adjusting for age, gender, joint, and |

|                  |              |                    |                                                                                                                                                                                                                                                                               |
|------------------|--------------|--------------------|-------------------------------------------------------------------------------------------------------------------------------------------------------------------------------------------------------------------------------------------------------------------------------|
|                  |              | KOOS               | presence of back pain, an increased BMI was associated with worst outcomes ( $p<0.02$ ) at long term after TKA or THA.                                                                                                                                                        |
| Dewan 2009       | 31 (0.5)     | Knee Society Score | BMI was <b>not</b> associated with worst knee function ( $p>0.119$ ) at long term after TKA.                                                                                                                                                                                  |
| Hamoui 2006      | 27.93 (7.1)* | Knee Society Score | No significant association between BMI and KSS ( $p>0.05$ ) were found at long term after TKA.                                                                                                                                                                                |
| Kort 2007        | NA           | WOMAC              | Obesity was <b>not</b> related to disability score ( $p>0.05$ ) at long term after TKA.                                                                                                                                                                                       |
| Liljensøe 2013   | 30 (NA)      | Knee Society Score | Increased BMI was associated with worst knee scores (OR 0.95, 95% CI 0.9 to 1.0, $p=0.04$ ) at long term after TKA. These results did not change significantly after adjusting for age, sex, primary disease and surgical approach (OR 0.94, 95% CI 0.90 to 0.99, $p=0.02$ ). |
| Mackie 2015      | NA           | WOMAC              | Increased BMI was associated with less improvement in disability scores (WOMAC $t=-2.13$ ; $p=0.033$ ) at long term after TKA.                                                                                                                                                |
| Rajgopal 2008    | 32.3 (6.58)* | WOMAC              | The morbidly obese group (BMI $\geq 40$ , $n=69$ ) does <b>not</b> present a statistically significant difference in improvement in WOMAC score ( $p=0.669$ ) when compared to others BMI groups at long term after TKA.                                                      |
| <b>Hip</b>       |              |                    |                                                                                                                                                                                                                                                                               |
| Heiberg 2013     | 27 (6.27)*   | HHS                | Increased BMI was associated with lower HHS ( $p<0.05$ ) at short term after THA.                                                                                                                                                                                             |
| Jameson 2014     | NA           | OHS                | Increased BMI was <b>not</b> associated with changes in OHS ( $p>0.05$ ) at short term after THA.                                                                                                                                                                             |
| Luebbecke 2007 B | 26.4 (4.3)   | HHS                | Increased BMI was associated with lower hip score ( $r=-0.4$ , 95% CI -0.8 to -0.1) at long term after THA.                                                                                                                                                                   |
| McLaughlin 2006  | 26 (NA)      | HHS                | The obese group (BMI $\geq 30$ ; $n=95$ ) did <b>not</b> present any statistically significant difference from the non-obese group (BMI $<30$ , $n=103$ ) with regards to clinical outcomes assessed by HHS ( $p>0.05$ ) at long term after THA.                              |
| Vogl 2014        | 26.9 (4.9)   | WOMAC              | Obesity was associated with changes in WOMAC score ( $p<0.05$ ) at short term after THA.                                                                                                                                                                                      |
| Wang 2010        | 29.14 (6.23) | WOMAC              | Increased BMI was <b>not</b> associated with WOMAC score ( $p=0.114$ ) at long term after THA.                                                                                                                                                                                |

**Table 3** – Results of individual studies on the association between post-surgical disability and baseline obesity.

BMI – Body Mass Index; SD – Standard deviation; NA – None available; WOMAC – Western Ontario and McMaster Universities Osteoarthritis Index; KOOS - Knee disability and Osteoarthritis Outcome Score;

1  
2  
3 TKA – Total knee arthroplasty; THA – Total hip arthroplasty; KSS – Knee Society Score; OR – Odds ratio; CI  
4 – Confidence interval; HHS – Harris Hip Score; OHS – Oxford Hip Score; r – coefficient of association;  
5 \*Calculated following guidelines from Cochrane Handbook for Systematic Reviews of Interventions.  
6  
7

### 8 9 **Association between obesity and post-surgical complications**

10 The association between obesity and complications after joint arthroplasty was assessed by  
11 40 studies including a total of 245,433 patients who underwent knee or hip arthroplasty. Of  
12 these, 17 presented enough data and were included in the meta-analyses.  
13  
14

15  
16  
17 The pooled results suggest that at short term follow-up, non-obese participants are less  
18 likely to have post-surgical deep vein thrombosis (DVT) (OR 0.48; 95% CI 0.25 to 0.91;  
19  $p=0.024$ ) when compared with obese participants (figure 5). A total of 13 studies were  
20 pooled ( $n=22,782$ ) showing non-obese patients are also less likely to present any long-term  
21 (i.e.  $\geq 6$  months) dislocation (OR: 0.49; 95% CI: 0.31 to 0.79;  $p=0.003$ ) and DVT (OR: 0.61;  
22 95% CI: 0.37 to 0.98;  $p=0.043$ ). Non-significant difference between groups was observed  
23 between non-obese and obese participants for long-term revision surgery (OR: 0.66; 95% CI:  
24 0.34 to 1.27;  $p=0.217$ ) (figure 5).  
25  
26  
27  
28  
29  
30  
31

32  
33 The pooled analysis on short-term post-surgical infection for hip replacement showed that  
34 non-obese patients are less likely to develop infections compared to obese participants (OR  
35 0.33; 95% CI 0.18 to 0.59;  $p<0.001$ )(Figure 6). For knee replacement separate analyses were  
36 conducted for studies comparing obese to non-obese participants and those comparing  
37 morbidly obese to non-obese participants (Figure 7). The results suggest that non-obese  
38 patients are less likely to develop infections when compared to morbidly obese patients (OR  
39 0.42; 95% CI 0.23 to 0.78;  $p= 0.006$ ). No association with post-surgical infection was  
40 observed when obese and non-obese participants were compared.  
41  
42  
43  
44  
45  
46  
47

48 The overall pooled analysis for incidence of complications suggests that non-obese  
49 participants are less likely to present any post-surgical complication at the short or long  
50 term follow-ups (OR: 0.48; 95% CI: 0.25 to 0.91;  $p<0.001$  and OR: 0.55; 95% CI: 0.41 to 0.74;  
51  $p<0.001$ , respectively). The results of individual studies not included in the pooled analyses  
52 are presented in the table 4 below.  
53  
54  
55  
56  
57

**Figure 5** - Pooled association between complications and obesity at short term and long term follow-ups.

**Figure 6** – Pooled association between post-surgical infections and obesity for hip surgery.

**Figure 7** – Pooled association of post-surgical infections for knee surgery.\*

\*Comparison for both pooled analysis is non-obese participants.

| Obesity vs Complications |                |            |                                                                                                                                                                      |
|--------------------------|----------------|------------|----------------------------------------------------------------------------------------------------------------------------------------------------------------------|
| Author, year             | BMI: Mean (SD) | Measure    | Results                                                                                                                                                              |
| Ollivier 2012            | 25.13 (3.14)*  | HHS / HOOS | At long term, high impact sports was associated with better HHS ( $p < 0.001$ ) after THA.                                                                           |
| Pietschmann 2013         | 28.4 (4.62)*   | OKS        | At long term, physical activities were <b>not</b> related to complications ( $p < 0.01$ ). Physically active patients had less pain and better OKS scores after UKA. |
| Poortinga 2014           | 28.7 (4.9)     | WOMAC      | At long term, physical activity was <b>not</b> associated with WOMAC score ( $p > 0.05$ ) after THA or TKA.                                                          |
| Sechriest 2007           | 28.1 (8.3)     | UCLA       | At long term increased BMI was <b>not</b> correlated to UCLA physical activity score ( $R = -0.07$ ; $p = 0.67$ ) after TKA.                                         |

**Table 4:** Results of individual studies investigating the association between obesity and post-surgical complications.

BMI – Body Mass Index; SD – Standard deviation; HHS – Harris Hip Score; HOOS - Hip disability and Osteoarthritis Outcome Score; THA – Total hip arthroplasty; OKS – Oxford Knee Score; UKA - Unicompartimental knee arthroplasty; WOMAC – Western Ontario and McMaster Universities Osteoarthritis Index; TKA – Total knee arthroplasty; UCLA - University of California, Los Angeles activity questionnaire; R – Correlation coefficient; \*Calculated following guidelines from Cochrane Handbook for Systematic Reviews of Interventions.

### Association between physical activity participation and disability

The association between physical activity and disability was investigated by four studies[73, 75, 76, 79] or 1,033 participants undergoing hip or knee arthroplasty. Included studies have not provided enough data to be pooled. The overall results from these 4 papers suggest that participants who practice more physical activity before the surgeries were more likely to

experience less pain after either hip or knee surgery, however the evidence regarding disability scores is still unclear with studies presenting contradictory results. Table 5 below presents the results of the individual studies.

| Physical Activity vs Disability |                |                   |                                                                                                                                                                                     |
|---------------------------------|----------------|-------------------|-------------------------------------------------------------------------------------------------------------------------------------------------------------------------------------|
| Author, year                    | BMI: Mean (SD) | Measure           | Results                                                                                                                                                                             |
| Ollivier 2012                   | 25.13 (3.14)*  | HHS / HOOS        | At long term, high impact sports were associated with better HHS ( $p < 0.001$ ) and HOOS ( $p < 0.05$ ) after THA.                                                                 |
| Pietschmann 2013                | 28.4 (4.62)*   | OKS / KSS / WOMAC | At long term, physical activities were <b>not</b> related to complications. Physically active patients had less pain and better OKS, KSS and WOMAC scores ( $p < 0.05$ ) after UKA. |
| Poortinga 2014                  | 28.7 (4.9)     | WOMAC             | At long term, physical activity was <b>not</b> associated with WOMAC score ( $p > 0.05$ ) after THA or TKA.                                                                         |
| Sechriest 2007                  | 28.1 (8.3)     | UCLA              | At long term increased BMI was <b>not</b> correlated to UCLA physical activity score ( $R = -0.07$ ; $p = 0.67$ ) after TKA.                                                        |

**Table 5** – Individual results on the association between physical activity and pain or disability.

BMI – Body Mass Index; SD – Standard deviation; HHS – Harris Hip Score; HOOS - Hip disability and Osteoarthritis Outcome Score; THA – Total hip arthroplasty; OKS – Oxford Knee Score; KSS – Knee Society Score; WOMAC – Western Ontario and McMaster Universities Osteoarthritis Index; UKA - Unicompartimental knee arthroplasty; TKA – Total knee arthroplasty; UCLA - University of California, Los Angeles activity questionnaire; R – Correlation coefficient; \*Calculated following guidelines from Cochrane Handbook for Systematic Reviews of Interventions.

## Discussion

### *Statement of principal findings*

Our results suggest that following surgery, non-obese patients experience further reductions in both pain and disability post knee and hip arthroplasty when compared to obese patients, where obesity has been defined as having a BMI of 30 kg/m<sup>2</sup> or over. These differences seemed to be more accentuated for knee pain outcomes following arthroplasty, than for hip pain or disability outcomes. Non-obese participants also experienced significantly less post-surgical complications, including dislocation, DVT and infection

1  
2  
3 especially following hip arthroplasty. Our analyses also demonstrate that obesity is a reliable  
4 predictor of complications after total hip arthroplasty and total knee arthroplasty, not only  
5 in the short term after the procedure but also at longer follow-ups. The evidence regarding  
6 pre-operative physical activity remains unclear due to conflicting results of included studies,  
7 especially in terms of post-operative disability. The four included cohort studies however,  
8 suggest that physical activity participation is associated with better pain outcomes following  
9 surgery.  
10  
11  
12  
13  
14  
15

16  
17 Our results from the fractional polynomial analysis have also shown that all patients  
18 experienced an improvement in pain and disability post-surgery. We also highlight that  
19 although non-obese patients experience further improvements in pain and disability  
20 compared to obese participants, both groups improved significantly following surgery as  
21 depicted in figure 2. The observed decrease in pain from baseline was approximately 70% at  
22 6 months and 75% at 12 months, with decreases in disability of 55% at 12 months and 67%  
23 at 120 months. The interpretation of the postsurgical course of pain and disability, however,  
24 needs to be taken in the context of the inclusion criteria we have used in our review, given  
25 we have only included data from cohort studies that have assessed the role of obesity or  
26 physical activity participation on surgical outcomes.  
27  
28  
29  
30  
31  
32  
33  
34

35  
36 *Strengths and weaknesses in relation to other studies, discussing particularly any differences*  
37 *in results*  
38

39 Our meta-analysis results regarding the association between obesity and post-surgical  
40 complications found that obese patients present higher complication rates than non-obese  
41 patients. These results are consistent with the findings of previous systematic reviews of  
42 Hofstede,[14] Samson[15] and Liu.[16] Our meta-analysis results regarding the association  
43 between obesity and post-surgery disability also agreed with the findings of Buirs et al[13]  
44 and Samson et al[15] which found that obesity (defined as having BMI over 30 kg/m<sup>2</sup>), was  
45 associated with worst postsurgical functional score. The only previous review which has  
46 performed a meta-analysis on the association between obesity and post arthroplasty pain or  
47 disability limited its inclusion criteria to hip joint.[16] That review included a total of 15  
48 studies in their meta-analysis and found that obesity increases the risk of post-surgical  
49 complications (RR: 1.68, 95% CI 1.23 to 2.30, P = 0.0004) and is associated with worse  
50  
51  
52  
53  
54  
55  
56  
57  
58  
59

1  
2  
3 disability scores following surgery (MD: -2.75, 95% CI -4.77 to -0.6; P = 0.07). Our study has  
4 included 33 cohorts of hip arthroplasty participants in the qualitative analysis, 16 in the  
5 meta-analyses, and confirms past findings that obesity is associated with worse outcomes in  
6 terms of not only disability and complications, but also pain at both short and long term  
7 periods following surgery. Hofstede et al[14] have also conducted a systematic review of the  
8 literature on pre-operative predictors of surgical outcomes after hip replacement in patients  
9 with osteoarthritis. Although those authors included 35 studies, only 5 studies investigated  
10 the effect of obesity on post-surgical pain, disability and quality of life.[14] No meta-analysis  
11 was performed.  
12  
13  
14  
15  
16  
17  
18  
19

### 20 *Implications for clinicians or policy makers*

21 Our results have a direct impact on clinical practice as the results demonstrate that obese  
22 patients have a higher risk of complications and a poorer prognosis in terms of pain and  
23 disability post-operatively when compared with non-obese patients. These results also  
24 allude to the importance of identifying and implementing effective pre-surgical  
25 rehabilitation and weight loss approaches to optimise post-surgical outcomes and minimise  
26 harm to the patient. The importance of weight loss has been highlighted in international  
27 clinical guidelines on non-surgical management of knee osteoarthritis for instance, given the  
28 pain and disability reductions observed following weight loss regimes.[86] Past research also  
29 suggests there is a dose-response relationship between weight loss and clinical outcome  
30 improvement. A recent completer-type analysis of 1,383 participants with knee  
31 osteoarthritis showed that a weight loss of 7.7% of body weight or more is associated with  
32 clinically important changes in pain and disability, as measured using the Knee Injury and  
33 Osteoarthritis Outcome Score (KOOS).[87] This evidence reinforces the importance of pre-  
34 surgical weight loss programs and strategies in order to optimize post-surgical recovery.  
35  
36  
37  
38  
39  
40  
41  
42  
43  
44  
45  
46  
47

### 48 *Strengths and weaknesses of the study*

49 The current review has included 62 cohort studies and a total of 256,481 participants and is  
50 the most comprehensive systematic review on the topic to date. It is also the first review to  
51 use a quantitative approach to synthesize the results of pain, disability and surgical  
52 complications between non-obese and obese participants and consider the physical activity  
53 level of participants who underwent to hip or knee arthroplasty due to osteoarthritis. Our  
54  
55  
56  
57  
58  
59  
60



1  
2  
3 review has some limitations. The methodological quality of the included studies was in  
4 general poor. The most common methodological flaw among included cohorts was not  
5 controlling for confounding factors age, sex or BMI (32 studies, 51%) followed by not using a  
6 representative sample (n=30 studies, 48%). Moreover, we have observed great variability of  
7 follow-up duration across studies, ranging from 2 weeks to 11 years. We have used a cut-off  
8 of 6 months to define short (i.e. < 6 months) or long-term (i.e. ≥ 6 months) follow-ups, but  
9 acknowledge that within each follow-up category there was substantial variation in the  
10 duration of follow-up across studies.  
11  
12

13  
14  
15  
16  
17 Between-study heterogeneity has also been observed in some of the pooled analysis for  
18 obesity presented in this review. A potential source of between-study heterogeneity include  
19 the variability in the definition of obesity categories across studies. Although obesity was  
20 assessed using BMI scores in all studies some studies have used only two obesity groups (i.e.  
21 obese or non-obese) while others used several categories including underweight, normal or  
22 overweight, obese and morbidly obese. These needed to be combined for some of our  
23 pooled analyses.  
24  
25  
26  
27  
28  
29

30  
31 Another potential source of between-study heterogeneity across is the difference in surgical  
32 procedures used across studies. For instance, in the pooled analysis of risk of post-surgical  
33 DVT and obesity, whilst Kandil et al [54] performed unicompartmental knee arthroplasties,  
34 Friedman et al [42] performed total arthroplasties on both hip and knee joints. That  
35 discrepancy might explain the different results reported by these two studies (figure 5).  
36  
37 Likewise, the mean physical activity load reported by the included studies varied  
38 substantially, ranging from low to high frequency of participation in low and high impact  
39 activities. This should be taken into consideration when interpreting the physical activity  
40 results.  
41  
42  
43  
44  
45  
46  
47  
48  
49  
50

## 51 **Conclusion**

52  
53 Our results have shown that obese patients undergoing hip or knee arthroplasty due to  
54 osteoarthritis have worse outcomes in terms of pain and complications when compared to  
55  
56  
57

1  
2  
3 non-obese patients, with differences more accentuated for patients with knee  
4 osteoarthritis. Likewise, obese patients will have worse surgical outcomes in terms of  
5 disability, but only at long-term follow-ups. It is still unclear whether pre-surgical physical  
6 activity participation has an impact on surgical outcomes. However, we acknowledge that  
7 the health benefits of physical activity participation for patients with knee and hip  
8 osteoarthritis are multiple and reach beyond those considered in this review.  
9  
10  
11  
12  
13  
14  
15  
16

### 17 **Acknowledgements**

18 The abstract of this work has been published in the conference proceedings of the 2017  
19 Osteoarthritis Research Society International.  
20  
21  
22  
23

24 **Contributors:** DP, GCM, PHF, FB and MF were involved in the conception and design of the  
25 review. DP, GCM and MF developed the search strategy and performed study selection. DP  
26 and GCM extracted data from included studies. DP and GV assessed the methodological  
27 quality of included studies. DP and MLF were involved in the data analysis. DP, GCM, PHF,  
28 FB and MF were involved in the interpretation and discussion of results. DP drafted the  
29 manuscript, and GCM, PHF, FB and MF contributed to the drafting of the review. GCM, PHF,  
30 FB and MF revised it critically for important intellectual content. All authors approved the  
31 final version of the article. All authors had access to all of the data in the study and can take  
32 responsibility for the integrity of the data and the accuracy of the data analysis.  
33  
34  
35  
36  
37  
38  
39

40 The authors would like to acknowledge the participation of Ms Giovana Visentini in the  
41 independent methodological quality assessment of the included studies.  
42  
43  
44  
45  
46

47 **Funding:** This research received no specific grant from any funding agency in the public,  
48 commercial, or not-for-profit sectors. DP is a Ph.D. student and holds the Science Without  
49 Borders Scholarship from the Brazilian Government. This work was carried out with CNPq  
50 support, National Council for Scientific and Technological Development – Brazil. MF holds a  
51 Sydney Medical Foundation Fellowship.  
52  
53  
54  
55  
56  
57  
58  
59  
60

1  
2  
3 **Ethical approval:** Not required.  
4  
5

6 **Competing Interests Statement**  
7

8 All authors have completed the ICMJE uniform disclosure form  
9 [www.icmje.org/coi\\_disclosure.pdf](http://www.icmje.org/coi_disclosure.pdf) and declare: no support from any organisation for the  
10 submitted work; no financial relationships with any organisations that might have an  
11 interest in the submitted work in the previous three years; no other relationships or  
12 activities that could appear to have influenced the submitted work.  
13  
14  
15  
16  
17

18 **Data sharing:** All data extracted from papers and used to write this paper is available to  
19 whoever ask. Contact the correspondence author for further information.  
20  
21  
22

23 **Transparency:** The lead author (Daniel Pozzobon) affirms that the manuscript is an honest,  
24 accurate, and transparent account of the study being reported; no important aspects of the  
25 study have been omitted.  
26  
27  
28  
29  
30  
31  
32  
33  
34  
35  
36  
37  
38  
39  
40  
41  
42  
43  
44  
45  
46  
47  
48  
49  
50  
51  
52  
53  
54  
55  
56  
57  
58  
59  
60

## References

1. Neogi T. The epidemiology and impact of pain in osteoarthritis. *Osteoarthritis and Cartilage*. 2013;21(9):1145-53.
2. Flegal KM, Carroll MDO, Cynthia L. Curtin, Lester R. Prevalence and Trends in Obesity Among US Adults, 1999-2008. *Journal of American Medical Association*. 2010;303(3).
3. Sharif B, Kopec J, Bansback N, Rahman MM, Flanagan WM, Wong H, et al. Projecting the direct cost burden of osteoarthritis in Canada using a microsimulation model. *Osteoarthritis and Cartilage*. 2015;23(10):1654-63.
4. Chen A, Gupte C, Akhtar K, Smith P, Cobb J. The Global Economic Cost of Osteoarthritis: How the UK Compares. *Arthritis*. 2012;2012:6.
5. Wood AM, Brock TM, Heil K, Holmes R, Weusten A. A Review on the Management of Hip and Knee Osteoarthritis. *International Journal of Chronic Diseases*. 2013;2013:10.
6. Katz JN, Earp BE, Gomoll AH. Surgical Management of Osteoarthritis. *Arthritis care & research*. 2010;62(9):1220-8.
7. Johnson VL, Hunter DJ. The epidemiology of osteoarthritis. *Best Practice & Research Clinical Rheumatology*. 2014;28(1):5-15.
8. Lee I-M, Shiroma EL, F. Puska, P. Blair, SN. Katzmarzyk, PT. Effect of physical inactivity on major non-communicable diseases worldwide: an analysis of burden of disease and life expectancy. *The Lancet*. 2012;380:29.
9. Zeni JA, Snyder-Mackler L. Most patients gain weight in the 2 years after total knee arthroplasty: Comparison to a healthy control group. *Osteoarthritis and Cartilage*. 2010;18(4):510-4.
10. Núñez M, Lozano L, Núñez E, Segur JM, Sastre S, Maculé F, et al. Total knee replacement and health-related quality of life: Factors influencing long-term outcomes. *Arthritis & Rheumatism: Arthritis Care & Research*. 2009;61(8):1062-9.
11. Amin AK, Sales JD, Brenkel IJ. Obesity and total knee and hip replacement. *Current Orthopaedics*. 2006;20(3):216-21.
12. Wagenmakers R, Stevens M, Groothoff JW, Zijlstra W, Bulstra SK, van Beveren J, et al. Physical Activity Behavior of Patients 1 Year After Primary Total Hip Arthroplasty: A Prospective Multicenter Cohort Study. *Physical Therapy*. 2011;91(3):373-80.
13. Buirs LD, Van Beers LW, Scholtes VA, Pastoors T, Sprague S, Poolman RW. Predictors of physical functioning after total hip arthroplasty: a systematic review. *BMJ Open*. 2016;6(9):e010725.
14. Hofstede SN, Gademan MGJ, Vliet Vlieland TPM, Nelissen RGHH, Marang-van de Mheen PJ. Preoperative predictors for outcomes after total hip replacement in patients with osteoarthritis: a systematic review. *BMC Musculoskeletal Disorders*. 2016;17(1):212.
15. Samson AJ, Mercer GE, Campbell DG. Total knee replacement in the morbidly obese: a literature review. *ANZ J Surg*. 2010;80(9):595-9.
16. Liu W, Wahafu T, Cheng M, Cheng T, Zhang Y, Zhang X. The influence of obesity on primary total hip arthroplasty outcomes: A meta-analysis of prospective cohort studies. *Orthopaedics & Traumatology: Surgery & Research*. 2015;101(3):289-96.
17. Liberati A, Altman DG, Tetzlaff J, Mulrow C, Gøtzsche PC, Ioannidis JPA, et al. The PRISMA statement for reporting systematic reviews and meta-analyses of studies that evaluate healthcare interventions: explanation and elaboration. *The BMJ*. 2009;339:b2700.
18. Higgins J, Green S, (editors). *Cochrane Handbook for Systematic Reviews of Interventions Version 5.1.0 [updated March 2011]*. The Cochrane Collaboration; 2011. Available from: <http://handbook.cochrane.org>.
19. Wells G, Shea B, O'Connell D, Peterson J, Welch V, Losos M, et al. The Newcastle-Ottawa Scale (NOS) for assessing the quality of nonrandomised studies in meta-analyses. [cited 2017 29/08/17]. Available from: [http://www.ohri.ca/programs/clinical\\_epidemiology/oxford.asp](http://www.ohri.ca/programs/clinical_epidemiology/oxford.asp).
20. Royston P, Sauerbrei W. Fractional Polynomials for One Variable. *Multivariable Model-Building*: John Wiley & Sons, Ltd; 2008. p. 71-98.

- 1
- 2
- 3 21. Higgins JPT, Thompson SG, Deeks JJ, Altman DG. Measuring inconsistency in meta-analyses. *BMJ : British Medical Journal*. 2003;327(7414):557-60.
- 4
- 5 22. Cohen J. *Statistical power analysis of the behavioral sciences*: New York: Academic Press;
- 6 1988.
- 7 23. Sedgwick P. Meta-analyses: how to read a funnel plot. *BMJ : British Medical Journal*.
- 8 2013;346.
- 9 24. AbdelSalam H, Restrepo C, Tarity TD, Sangster W, Parvizi J. Predictors of Intensive Care Unit
- 10 Admission After Total Joint Arthroplasty. *Journal of Arthroplasty*. 2012;27(5):720-5.
- 11 25. Amin AK, Clayton RA, Patton JT, Gaston M, Cook RE, Brenkel IJ. Total knee replacement in
- 12 morbidly obese patients. Results of a prospective, matched study. *Journal of Bone & Joint Surgery,*
- 13 *British Volume*. 2006 B;88B(10):1321-6.
- 14 26. Amin AK, Patton JT, Cook RE, Brenkel IJ. Does obesity influence the clinical outcome at five
- 15 years following total knee replacement for osteoarthritis? *Journal of Bone & Joint Surgery, British*
- 16 *Volume*. 2006 A;88B(3):335-40.
- 17 27. Andrew JG, Palan J, Kurup HV, Gibson P, Murray DW, Beard DJ. Obesity in total hip
- 18 replacement. *Journal of Bone & Joint Surgery, British Volume*. 2008;90B(4):424-9.
- 19 28. Azodi OS, Adami J, Lindstroem D, Eriksson KO, Wladis A, Bellocco R. High body mass index is
- 20 associated with increased risk of implant dislocation following primary total hip replacement - 2,106
- 21 patients followed for up to 8 years. *Acta Orthopaedica*. 2008;79(1):141-7.
- 22 29. Azodi OS, Bellocco R, Eriksson K, Adami J. The impact of tobacco use and body mass index on
- 23 the length of stay in hospital and the risk of post-operative complications among patients
- 24 undergoing total hip replacement. *Journal of Bone and Joint Surgery-British Volume*.
- 25 2006;88B(10):1316-20.
- 26 30. Baker P, Petheram T, Jameson S, Reed M, Gregg P, Deehan D. The association between body
- 27 mass index and the outcomes of total knee arthroplasty. *Journal of Bone & Joint Surgery, American*
- 28 *Volume*. 2012;94(16):1501-8.
- 29 31. Belmont PJ, Jr., Goodman GP, Hamilton W, Waterman BR, Bader JO, Schoenfeld AJ.
- 30 *Morbidity and Mortality in the Thirty-Day Period Following Total Hip Arthroplasty: Risk Factors and*
- 31 *Incidence*. *Journal of Arthroplasty*. 2014 A;29(10):2025-30.
- 32 32. Belmont PJ, Jr., Goodman GP, Waterman BR, Bader JO, Schoenfeld AJ. Thirty-Day
- 33 *Postoperative Complications and Mortality Following Total Knee Arthroplasty*. *Journal of Bone and*
- 34 *Joint Surgery-American Volume*. 2014 B;96A(1):20-6.
- 35 33. Bozic KJ, Lau E, Kurtz S, Ong K, Berry DJ. Patient-related Risk Factors for Postoperative
- 36 *Mortality and Periprosthetic Joint Infection in Medicare Patients Undergoing TKA*. *Clinical*
- 37 *Orthopaedics and Related Research*. 2012 B;470(1):130-7.
- 38 34. Bozic KJ, Lau E, Kurtz S, Ong K, Rubash H, Vail TP, et al. Patient-related risk factors for
- 39 *periprosthetic joint infection and postoperative mortality following total hip arthroplasty in*
- 40 *medicare patients*. *Journal of Bone & Joint Surgery, American Volume*. 2012 A;94(9):794-800.
- 41 35. Chee YH, Teoh KH, Sabnis BM, Ballantyne JA, Brenkel IJ. Total hip replacement in morbidly
- 42 obese patients with osteoarthritis: RESULTS OF A PROSPECTIVELY MATCHED STUDY. *Journal of Bone*
- 43 *& Joint Surgery, British Volume*. 2010;92(8):1066-71.
- 44 36. Chesney D, Sales J, Elton R, Brenkel IJ. Infection After Knee Arthroplasty. A Prospective Study
- 45 *of 1509 Cases*. *Journal of Arthroplasty*. 2008;23(3):355-9.
- 46 37. Collins RA, Walmsley PJ, Amin AK, Brenkel IJ, Clayton RAE. Does obesity influence clinical
- 47 *outcome at nine years following total knee replacement?* *Journal of Bone and Joint Surgery - Series*
- 48 *B*. 2012;94 B(10):1351-5.
- 49 38. Davis AM, Perruccio AV, Ibrahim S, Hogg-Johnson S, Wong R, Streiner DL, et al. The
- 50 *trajectory of recovery and the inter-relationships of symptoms, activity and participation in the first*
- 51 *year following total hip and knee replacement*. *Osteoarthritis and Cartilage*. 2011;19(12):1413-21.
- 52
- 53
- 54
- 55
- 56
- 57
- 58
- 59
- 60

39. Dewan A, Bertolusso R, Karastinos A, Conditt M, Noble PC, Parsley BS. Implant Durability and Knee Function After Total Knee Arthroplasty in the Morbidly Obese Patient. *Journal of Arthroplasty*. 2009;24(6 SUPPL.):89-94.e3.
40. Dowsey MM, Liew D, Stoney JD, Choong PF. The impact of obesity on weight change and outcomes at 12 months in patients undergoing total hip arthroplasty. *Medical Journal of Australia*. 2010;193(1):17-21.
41. Font-Vizcarra L, Tornero E, Bori G, Bosch J, Mensa J, Soriano A. Relationship between intraoperative cultures during hip arthroplasty, obesity, and the risk of early prosthetic joint infection: A prospective study of 428 patients. *International Journal of Artificial Organs*. 2011;34(9):870-5.
42. Friedman RJ, Hess S, Berkowitz SD, Homering M. Complication Rates After Hip or Knee Arthroplasty in Morbidly Obese Patients. *Clinical Orthopaedics and Related Research*. 2013;471(10):3358-66.
43. Gandhi R, Razak F, Davey JR, Mahomed NN. Metabolic syndrome and the functional outcomes of hip and knee arthroplasty. *Journal of Rheumatology*. 2010;37(9):1917-22.
44. Hamoui N, Kantor S, Vince K, Crookes PF. Long-term outcome of total knee replacement: Does obesity matter? *Obesity Surgery*. 2006;16(1):35-8.
45. Heiberg KE, Ekeland A, Bruun-Olsen V, Mengshoel AM. Recovery and prediction of physical functioning outcomes during the first year after total hip arthroplasty. *Archives of Physical Medicine & Rehabilitation*. 2013;94(7):1352-9.
46. Ibrahim T, Hobson S, Beiri A, Esler CN. No influence of body mass index on early outcome following total hip arthroplasty. *International Orthopaedics*. 2005;29(6):359-61.
47. Jackson MP, Sexton SA, Walter WL, Walter WK, Zicat BA. The impact of obesity on the mid-term outcome of cementless total knee replacement. *Journal of Bone & Joint Surgery, British Volume*. 2009;91(8):1044-8.
48. Jameson SS, Mason JM, Baker PN, Elson DW, Deehan DJ, Reed MR. The impact of body mass index on patient reported outcome measures (proms) and complications following primary hip arthroplasty. *Journal of Arthroplasty*. 2014;29(10):1889-98.
49. Jamsen E, Nevalainen P, Eskelinen A, Huotari K, Kalliovalkama J, Moilanen T. Obesity, diabetes, and preoperative hyperglycemia as predictors of periprosthetic joint infection: A single-center analysis of 7181 primary hip and knee replacements for osteoarthritis. *Journal of Bone and Joint Surgery - Series A*. 2012;94(14):e101.1-e.9.
50. Jamsen E, Varonen M, Huhtala H, Lehto MUK, Lumio J, Konttinen YT, et al. Incidence of Prosthetic Joint Infections After Primary Knee Arthroplasty. *Journal of Arthroplasty*. 2010;25(1):87-92.
51. Jarvenpaa J, Kettunen J, Kroger H, Miettinen H. Obesity may impair the early outcome of total knee arthroplasty. A prospective study of 100 patients. *Scandinavian Journal of Surgery*. 2010;99(1):45-9.
52. Jarvenpaa J, Kettunen J, Soininvaara T, Miettinen H, Kroger H. Obesity has a negative impact on clinical outcome after total knee arthroplasty. *Scandinavian Journal of Surgery*. 2012;101(3):198-203.
53. Judge A, Cooper C, Williams S, Dreinhoefer K, Dieppe P. Patient-reported outcomes one year after primary hip replacement in a European collaborative cohort. *Arthritis Care and Research*. 2010;62(4):480-8.
54. Kandil A, Werner BC, Gwathmey WF, Browne JA. Obesity, Morbid Obesity and their Related Medical Comorbidities are Associated with Increased Complications and Revision Rates after Unicompartamental Knee Arthroplasty. *Journal of Arthroplasty*. 2015;30(3):456-60.
55. Kessler S, Kaefert W. Overweight and obesity: Two predictors for worse early outcome in total hip replacement? *Obesity*. 2007;15(11):2840-5.
56. Kim K-I, Cho K-Y, Jin W, Khurana SS, Bae D-K. Recent Korean Perspective of Deep Vein Thrombosis After Total Knee Arthroplasty. *Journal of Arthroplasty*. 2011;26(7):1112-6.

- 1  
2  
3 57. Kort NP, van Raay JJ, van Horn JJ. The Oxford phase III unicompartmental knee replacement  
4 in patients less than 60 years of age. *Knee Surgery, Sports Traumatology, Arthroscopy*.  
5 2007;15(4):356-60.
- 6 58. Ledford CK, Ruberte Thiele RA, Appleton JS, Jr., Butler RJ, Wellman SS, Attarian DE, et al.  
7 Percent body fat more associated with perioperative risks after total joint arthroplasty than body  
8 mass index. *Journal of Arthroplasty*. 2014;29(9 Suppl):150-4.
- 9 59. Liabaud B, Patrick DA, Geller JA. Higher Body Mass Index Leads to Longer Operative Time in  
10 Total Knee Arthroplasty. *Journal of Arthroplasty*. 2013;28(4):563-5.
- 11 60. Liljensøe A, Lauersen JO, Søballe K, Mechlenburg I. Overweight preoperatively impairs  
12 clinical outcome after knee arthroplasty. *Acta Orthopaedica*. 2013;84(4):392-7.
- 13 61. Lübbeke A, Katz JN, Perneger TV, Hoffmeyer P. Primary and revision hip arthroplasty: 5-  
14 year outcomes and influence of age and comorbidity. *Journal of Rheumatology*. 2007 B;34(2):394-  
15 400.
- 16 62. Luebbeke A, Stern R, Garavaglia G, Zurcher L, Hoffmeyer P. Differences in outcomes of obese  
17 women and men undergoing primary total hip arthroplasty. *Arthritis & Rheumatism-Arthritis Care &  
18 Research*. 2007 A;57(2):327-34.
- 19 63. Mackie A, Muthumayandi K, Shirley M, Deehan D, Gerrand C. Association between body  
20 mass index change and outcome in the first year after total knee arthroplasty. *Journal of  
21 Arthroplasty*. 2015;30(2):206-9.
- 22 64. Madsen AA, Taylor BC, Dimitris C, Hansen DC, Steensen RA, Gaines ST. Safety of bilateral  
23 total knee arthroplasty in morbidly obese patients. *Orthopedics*. 2014;37(3):e252-9.
- 24 65. Maisongrosse P, Lepage B, Cavaignac E, Pailhe R, Reina N, Chiron P, et al. Obesity is no  
25 longer a risk factor for dislocation after total hip arthroplasty with a double-mobility cup.  
26 *International Orthopaedics*. 2014.
- 27 66. McLaughlin JR, Lee KR. The outcome of total hip replacement in obese and non-obese  
28 patients at 10- to 18-years. *Journal of Bone & Joint Surgery, British Volume*. 2006;88B(10):1286-92.
- 29 67. Michalka PK, Khan RJ, Scaddan MC, Haebich S, Chirodian N, Wimhurst JA. The influence of  
30 obesity on early outcomes in primary hip arthroplasty. *Journal of Arthroplasty*. 2012;27(3):391-6.
- 31 68. Murray DW, Pandit H, Weston-Simons JS, Jenkins C, Gill HS, Lombardi AV, et al. Does body  
32 mass index affect the outcome of unicompartmental knee replacement? *Knee*. 2013;20(6):461-5.
- 33 69. Naal FD, Neuerburg C, Salzmann GM, Kriner M, von Knoch F, Preiss S, et al. Association of  
34 body mass index and clinical outcome 2 years after unicompartmental knee arthroplasty. *Archives of  
35 Orthopaedic and Trauma Surgery*. 2009;129(4):463-8.
- 36 70. Namba RS, Paxton L, Fithian DC, Stone ML. Obesity and perioperative morbidity in total hip  
37 and total knee arthroplasty patients. *Journal of Arthroplasty*. 2005;20(SUPPL. 3):46-50.
- 38 71. Napier RJ, O'Brien S, Bennett P, Doran E, Sykes A, Murray J, et al. Intra-operative and short  
39 term outcome of total knee arthroplasty in morbidly obese patients. *Knee*. 2014;21(3):784-8.
- 40 72. Naylor JM, Harmer AR, Heard RC. Severe other joint disease and obesity independently  
41 influence recovery after joint replacement surgery: An observational study. *Australian Journal of  
42 Physiotherapy*. 2008;54(1):57-64.
- 43 73. Ollivier M, Frey S, Parratte S, Flecher X, Argenson JN. Does impact sport activity influence  
44 total hip arthroplasty durability? *Clin Orthop*. 2012;470(11):3060-6.
- 45 74. Patel AD, Albrizio M. Relationship of body mass index to early complications in knee  
46 replacement surgery. *Archives of Orthopaedic and Trauma Surgery*. 2008;128(1):5-9.
- 47 75. Pietschmann MF, Wohlleb L, Weber P, Schmidutz F, Fickscherer A, Guelecycuez MF, et al.  
48 Sports activities after medial unicompartmental knee arthroplasty Oxford III-What can we expect?  
49 *International Orthopaedics*. 2013;37(1):31-7.
- 50 76. Poortinga S, Van Den Akker-Scheek I, Bulstra SK, Stewart RE, Stevens M. Preoperative  
51 physical activity level has no relationship to the degree of recovery one year after primary total hip  
52 or knee arthroplasty: A cohort study. *PLoS ONE*. 2014;9(12).
- 53  
54  
55  
56  
57  
58  
59  
60

- 1  
2  
3 77. Pulido L, Ghanem E, Joshi A, Purtill JJ, Parvizi J. Periprosthetic joint infection: the incidence,  
4 timing, and predisposing factors. *Clin Orthop*. 2008;466(7):1710-5.  
5 78. Rajgopal V, Bourne RB, Chesworth BM, MacDonald SJ, McCalden RW, Rorabeck CH. The  
6 impact of morbid obesity on patient outcomes after total knee arthroplasty. *Journal of Arthroplasty*.  
7 2008;23(6):795-800.  
8 79. Sechriest VF, II, Kyle RF, Marek DJ, Spates JD, Saleh KJ, Kuskowski M. Activity level in young  
9 patients with primary total hip arthroplasty - A 5-year minimum follow-up. *Journal of Arthroplasty*.  
10 2007;22(1):39-47.  
11 80. Villalobos PA, Navarro-Espigares JL, Hernandez-Torres E, Martinez-Montes JL, Villalobos M,  
12 Arroyo-Morales M. Body Mass Index as Predictor of Health-Related Quality-of-Life Changes After  
13 Total Hip Arthroplasty: A Cross-Over Study. *Journal of Arthroplasty*. 2013;28(4):666-70.  
14 81. Vogl M, Wilkesmann R, Lausmann C, Hunger M, Plotz W. The impact of preoperative patient  
15 characteristics on health states after total hip replacement and related satisfaction thresholds: A  
16 cohort study. *Health and Quality of Life Outcomes*. 2014;12(1).  
17 82. Wang W, Morrison TA, Geller JA, Yoon RS, Macaulay W. Predicting Short-Term Outcome of  
18 Primary Total Hip Arthroplasty A Prospective Multivariate Regression Analysis of 12 Independent  
19 Factors. *Journal of Arthroplasty*. 2010;25(6):858-64.  
20 83. Yasunaga H, Tsuchiya K, Matsuyama Y, Ohe K. Analysis of factors affecting operating time,  
21 postoperative complications, and length of stay for total knee arthroplasty: nationwide web-based  
22 survey. *Journal of Orthopaedic Science*. 2009;14(1):10-6.  
23 84. Zhang Z-j, Kang Y, Zhang Z-q, Yang Z-b, He A-s, Fu M, et al. The influence of body mass index  
24 on life quality and clinical improvement after total hip arthroplasty. *Journal of Orthopaedic Science*.  
25 2012;17(3):219-25.  
26 85. Dowsey MM, Choong PFM. Obesity is a major risk factor for prosthetic infection after  
27 primary hip arthroplasty. *Clinical Orthopaedics and Related Research*. 2008;466(1):153-8.  
28 86. McAlindon TE, Bannuru RR, Sullivan MC, Arden NK, Berenbaum F, Bierma-Zeinstra SM, et al.  
29 OARSJ guidelines for the non-surgical management of knee osteoarthritis. *Osteoarthritis and*  
30 *Cartilage*. 2014;22(3):363-88.  
31 87. Atukorala I, Makovey J, Lawler L, Messier SP, Bennell K, Hunter DJ. Is There a Dose-Response  
32 Relationship Between Weight Loss and Symptom Improvement in Persons With Knee Osteoarthritis?  
33 *Arthritis Care & Research*. 2016;68(8):1106-14.  
34  
35  
36  
37  
38  
39  
40  
41  
42  
43  
44  
45  
46  
47  
48  
49  
50  
51  
52  
53  
54  
55  
56  
57  
58  
59  
60



## FIGURE LEGEND

**Figure 1** – Flowchart of search strategy and screening steps.

Detailed steps of references screening process of results from database searches.

**Figure 2** - Fractional polynomial analysis for hip (A) and knee (B) disability scores and hip (C) and knee (D) pain scores over time.

A - Graphic representation of results from fractional polynomial analysis of disability scores evolution over time after hip surgeries;

B - Graphic representation of results from fractional polynomial analysis of disability scores evolution over time after knee surgeries;

C - Graphic representation of results from fractional polynomial analysis of pain scores evolution over time after hip surgeries;

D - Graphic representation of results from fractional polynomial analysis of pain scores evolution over time after knee surgeries.

**Figure 3** – Pooled standardised mean difference in pain at short and long term post-surgery between obese and non-obese patients.

Results from meta-analysis of included studies presented as standardised mean difference of pain scores at short (<6 months) and long term (≥6 months) follow-up between non-obese and obese groups.

**Figure 4** – Pooled standardised mean difference in disability at short and long term post-surgery between obese and non-obese patients.

Results from meta-analysis of included studies presented as standardised mean difference of disability scores at short (<6 months) and long term (≥6 months) follow-up between non-obese and obese groups.

**Figure 5** - Pooled association between complications and obesity at short term and long term follow-ups.

1  
2  
3 Results from meta-analysis of included studies presented as incidence of  
4 complications at short (<6 months) and long term ( $\geq 6$  months) follow-up between non-  
5 obese and obese groups.  
6  
7

8  
9  
10 **Figure 6** – Pooled association between post-surgical infections and obesity for hip surgery.

11 Results from meta-analysis of included studies presented as incidence of infections  
12 after hip surgery between non-obese and obese groups.  
13  
14

15  
16  
17 **Figure 7** – Pooled association of post-surgical infections for knee surgery.

18 Results from meta-analysis of included studies presented as incidence of infections  
19 after hip surgery comparing the non-obese group to obese group and the non-obese group  
20 to morbid obese group.  
21  
22  
23  
24  
25  
26  
27  
28  
29  
30  
31  
32  
33  
34  
35  
36  
37  
38  
39  
40  
41  
42  
43  
44  
45  
46  
47  
48  
49  
50  
51  
52  
53  
54  
55  
56  
57  
58  
59  
60

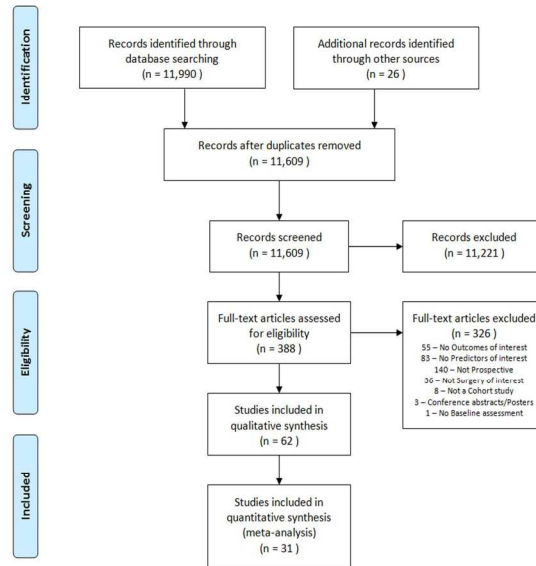

Figure 1. Flowchart of search strategy and screening steps.

254x142mm (300 x 300 DPI)

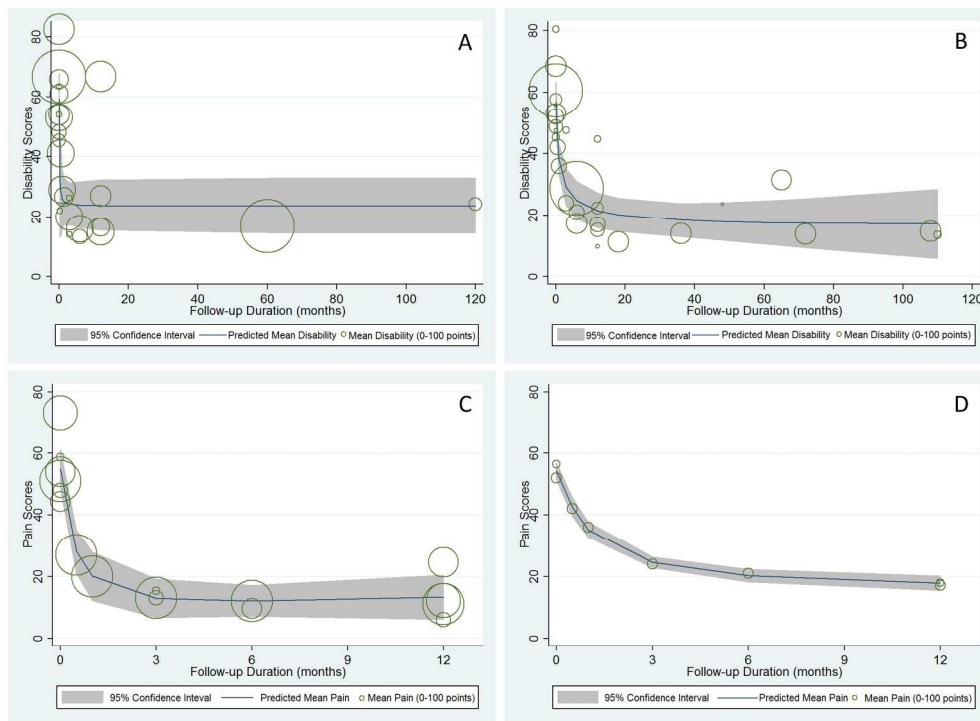

Figure 2 - Fractional polynomial analysis for hip (A) and knee (B) disability scores and hip (C) and knee (D) pain scores over time.

254x190mm (300 x 300 DPI)

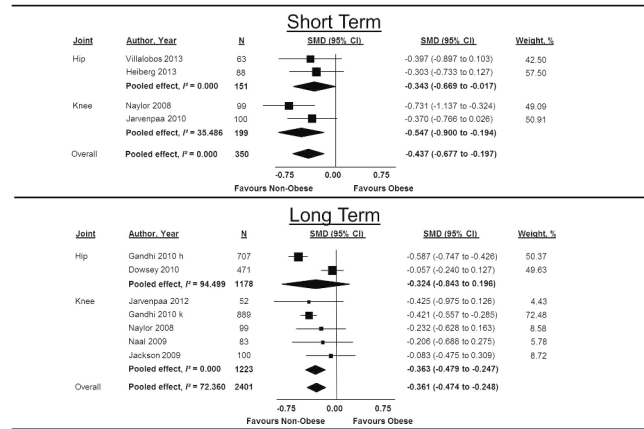

Figure 3 – Pooled standardised mean difference in pain at short and long term post-surgery between obese and non-obese patients.

254x142mm (300 x 300 DPI)

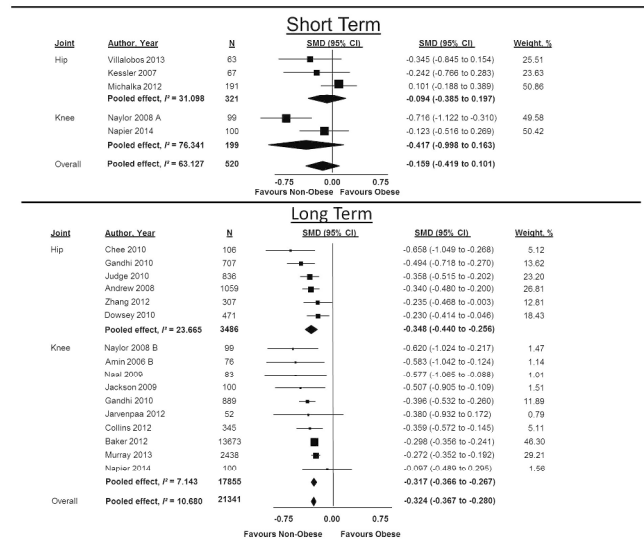

Figure 4 – Pooled standardized mean difference in disability at short and long term post-surgery between obese and non-obese patients.

254x142mm (300 x 300 DPI)

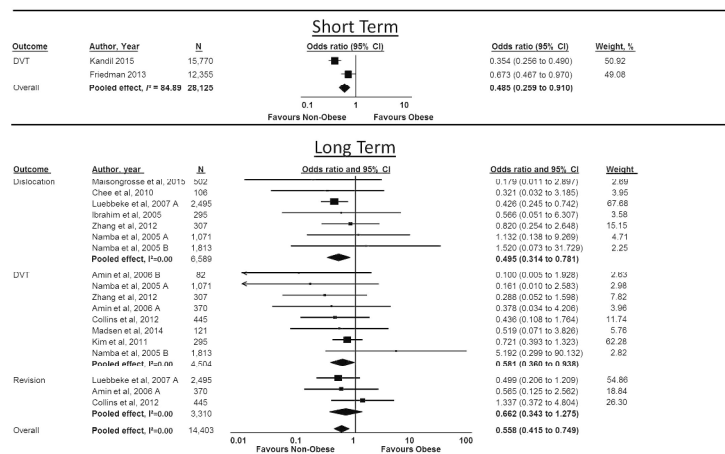

Figure 5 – Pooled association between complications and obesity at short term and long term follow-ups.

254x142mm (300 x 300 DPI)

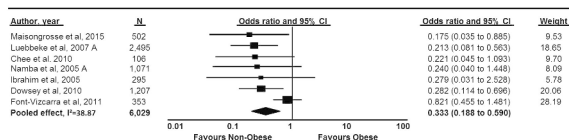

Figure 6 – Pooled association between post-surgical infections and obesity for hip surgery.

254x142mm (300 x 300 DPI)



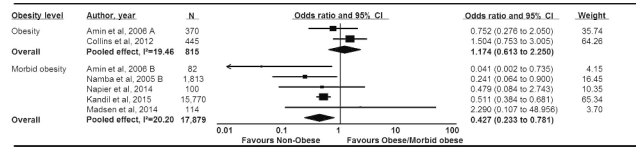

Figure 7 – Pooled association of post-surgical infections for knee surgery.\*

254x142mm (300 x 300 DPI)

## APPENDIX 1

## MEDLINE search strategy terms used:

|    |                                                                                                                                                                                                                                         |                  |
|----|-----------------------------------------------------------------------------------------------------------------------------------------------------------------------------------------------------------------------------------------|------------------|
| 1  | obesity.mp. or exp Obesity/ or exp Obesity, Abdominal/                                                                                                                                                                                  | 197.941          |
| 2  | Physical Activity.mp. or exp Motor Activity/                                                                                                                                                                                            | 231.947          |
| 3  | sedentar\$.mp.                                                                                                                                                                                                                          | 19.058           |
| 4  | (time adj5 sitting).mp. [mp=title, abstract, original title, name of substance<br>word, subject heading word, keyword heading word, protocol supplementary<br>concept word, rare disease supplementary concept word, unique identifier] | 688              |
| 5  | <b>1 or 2 or 3 or 4</b>                                                                                                                                                                                                                 | <b>414.967</b>   |
| 6  | exp Postoperative Complications/ or exp Hip Prosthesis/ or exp Arthroplasty,<br>Replacement, Hip/ or hip arthroplasty.mp. or exp Osteoarthritis, Hip/ or exp<br>Hip Joint/                                                              | 469.282          |
| 7  | knee arthroplasty.mp. or exp Arthroplasty, Replacement, Knee/                                                                                                                                                                           | 17.365           |
| 8  | exp Elective Surgical Procedures/ or elective surgery.mp.                                                                                                                                                                               | 14.058           |
| 9  | osteoarthritis.mp. or exp Osteoarthritis, Hip/ or exp Osteoarthritis/ or exp<br>Osteoarthritis, Knee/                                                                                                                                   | 55.493           |
| 10 | exp Osteonecrosis/ or Osteonecrosis.mp.                                                                                                                                                                                                 | 13.961           |
| 11 | arthroplasty.mp. or exp Arthroplasty, Replacement, Knee/ or exp Arthroplasty,<br>Replacement/ or exp Arthroplasty/ or exp Arthroplasty, Replacement, Hip/                                                                               | 53.979           |
| 12 | <b>6 or 7 or 8 or 9 or 10 or 11</b>                                                                                                                                                                                                     | <b>546.616</b>   |
| 13 | exp Cohort Studies/ or cohort.mp.                                                                                                                                                                                                       | 1.526.984        |
| 14 | incidence.mp. or exp Incidence/                                                                                                                                                                                                         | 587.274          |
| 15 | exp Follow-Up Studies/ or follow-up.mp.                                                                                                                                                                                                 | 912.064          |
| 16 | prognosis.mp. or exp Prognosis/                                                                                                                                                                                                         | 1.273.869        |
| 17 | exp Prognosis/ or predictors.mp.                                                                                                                                                                                                        | 1.258.014        |
| 18 | exp Time Factors/ or course.mp.                                                                                                                                                                                                         | 1.403.404        |
| 19 | exp Survival Analysis/ or exp Survival/ or exp Survival Rate/ or survival.mp.                                                                                                                                                           | 843.771          |
| 20 | logistic.mp.                                                                                                                                                                                                                            | 198.801          |
| 21 | cox.mp.                                                                                                                                                                                                                                 | 84.820           |
| 22 | life table.mp. or exp Life Tables/                                                                                                                                                                                                      | 18.098           |
| 23 | log rank.mp. or exp Follow-Up Studies/                                                                                                                                                                                                  | 533.280          |
| 24 | <b>13 or 14 or 15 or 16 or 17 or 18 or 19 or 20 or 21 or 22 or 23</b>                                                                                                                                                                   | <b>4.460.132</b> |
| 25 | Animals/                                                                                                                                                                                                                                | 5.495.334        |
| 26 | exp Editorial/ or editorial.mp.                                                                                                                                                                                                         | 376.114          |
| 27 | case report.mp. or exp Case Reports/                                                                                                                                                                                                    | 1.754.352        |
| 28 | letter.mp. or exp Letter/                                                                                                                                                                                                               | 895.420          |
| 29 | 25 or 26 or 27 or 28                                                                                                                                                                                                                    | 8.184.015        |
| 30 | <b>5 and 12 and 24</b>                                                                                                                                                                                                                  | <b>7.601</b>     |
| 31 | <b>30 not 29</b>                                                                                                                                                                                                                        | <b>6.869</b>     |

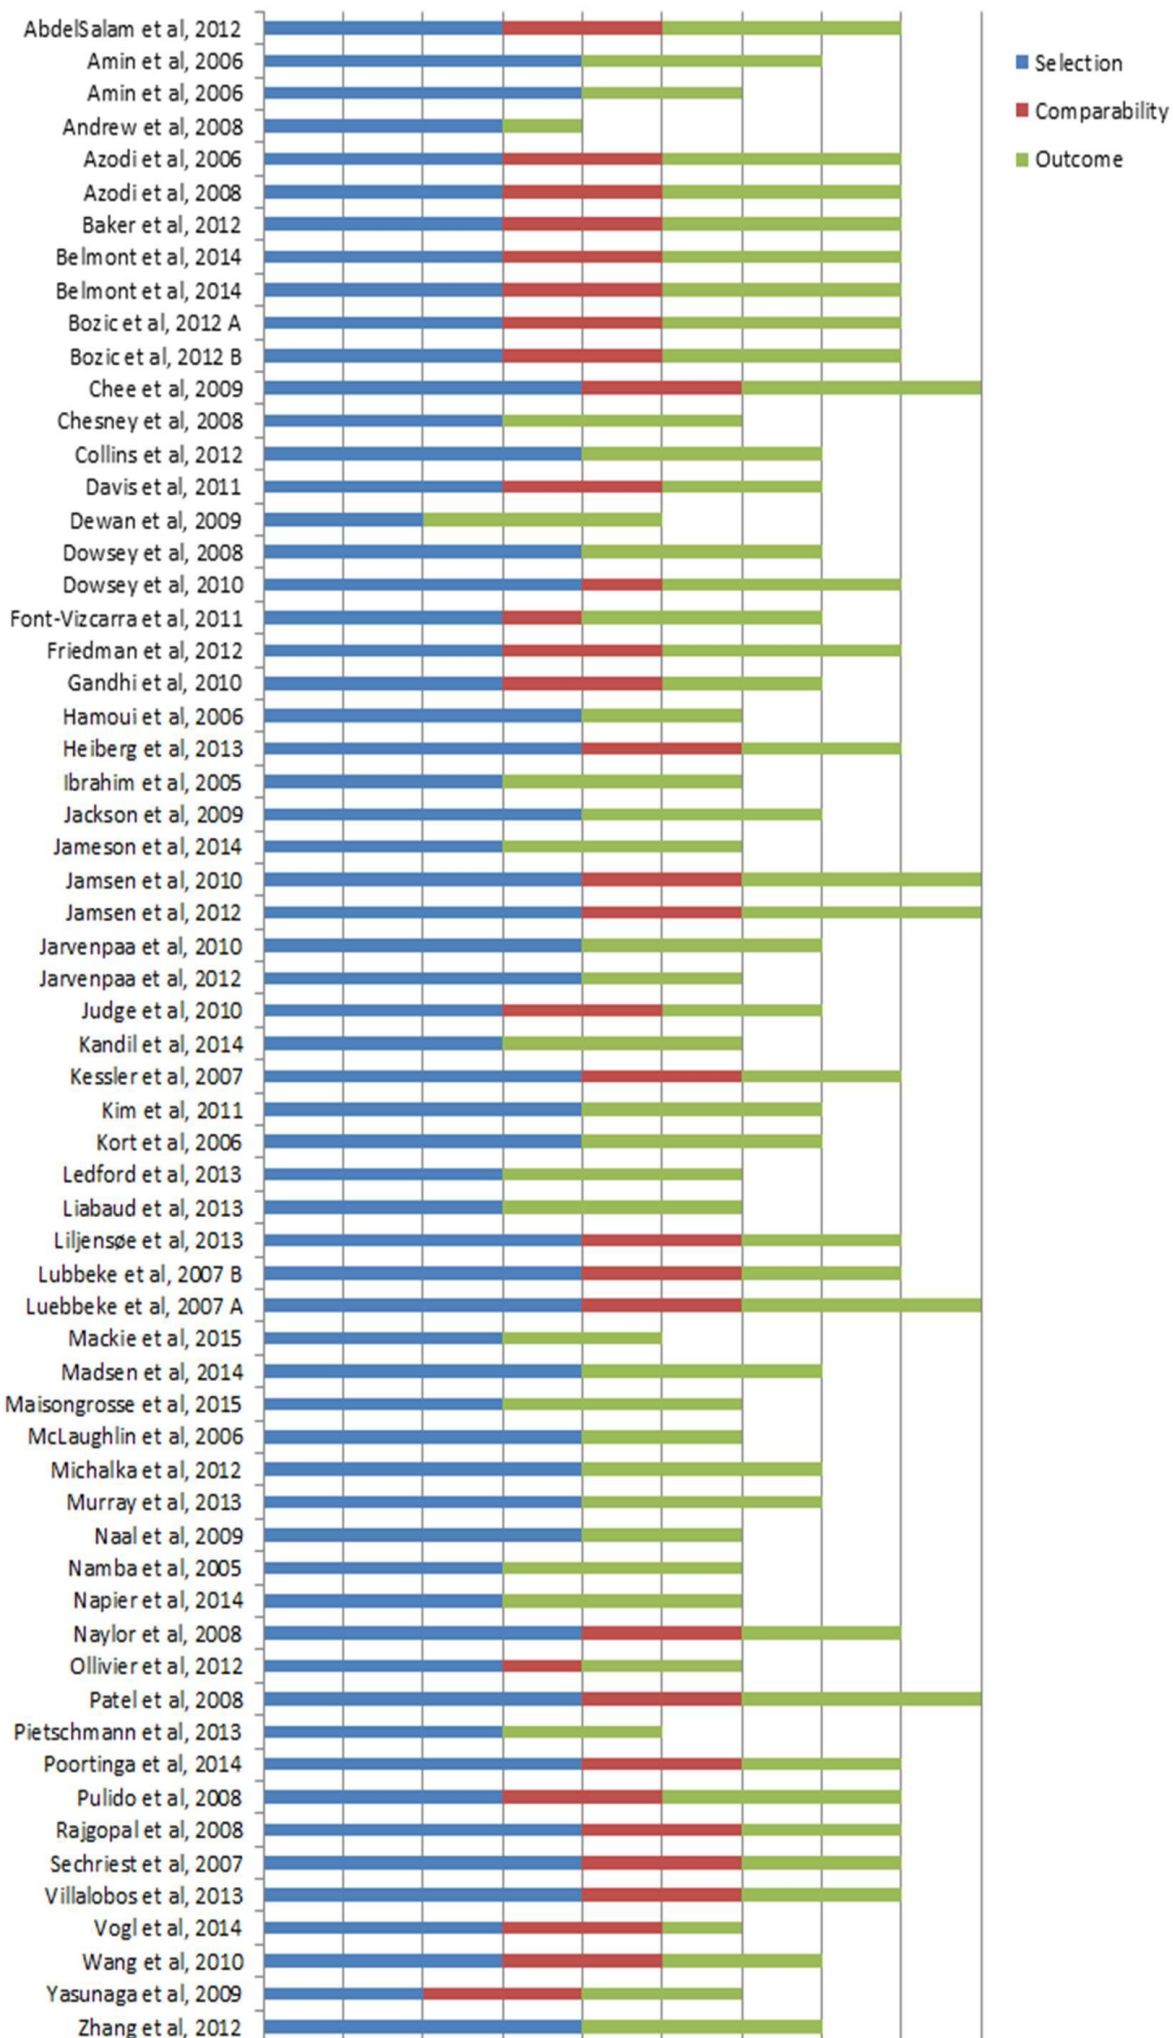

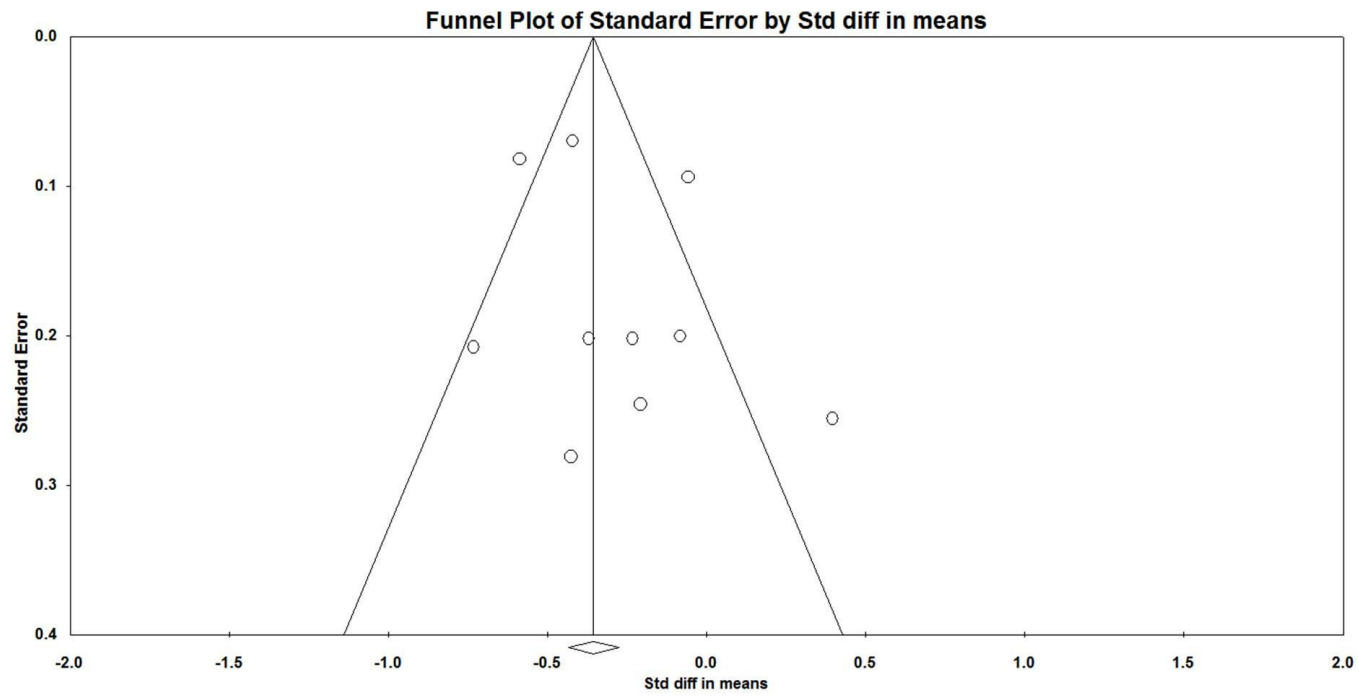

1  
2  
3  
4  
5  
6  
7  
8  
9  
10  
11  
12  
13  
14  
15  
16  
17  
18  
19  
20  
21  
22  
23  
24  
25  
26  
27  
28  
29  
30  
31  
32  
33  
34  
35  
36  
37  
38  
39  
40  
41  
42  
43  
44  
45  
46

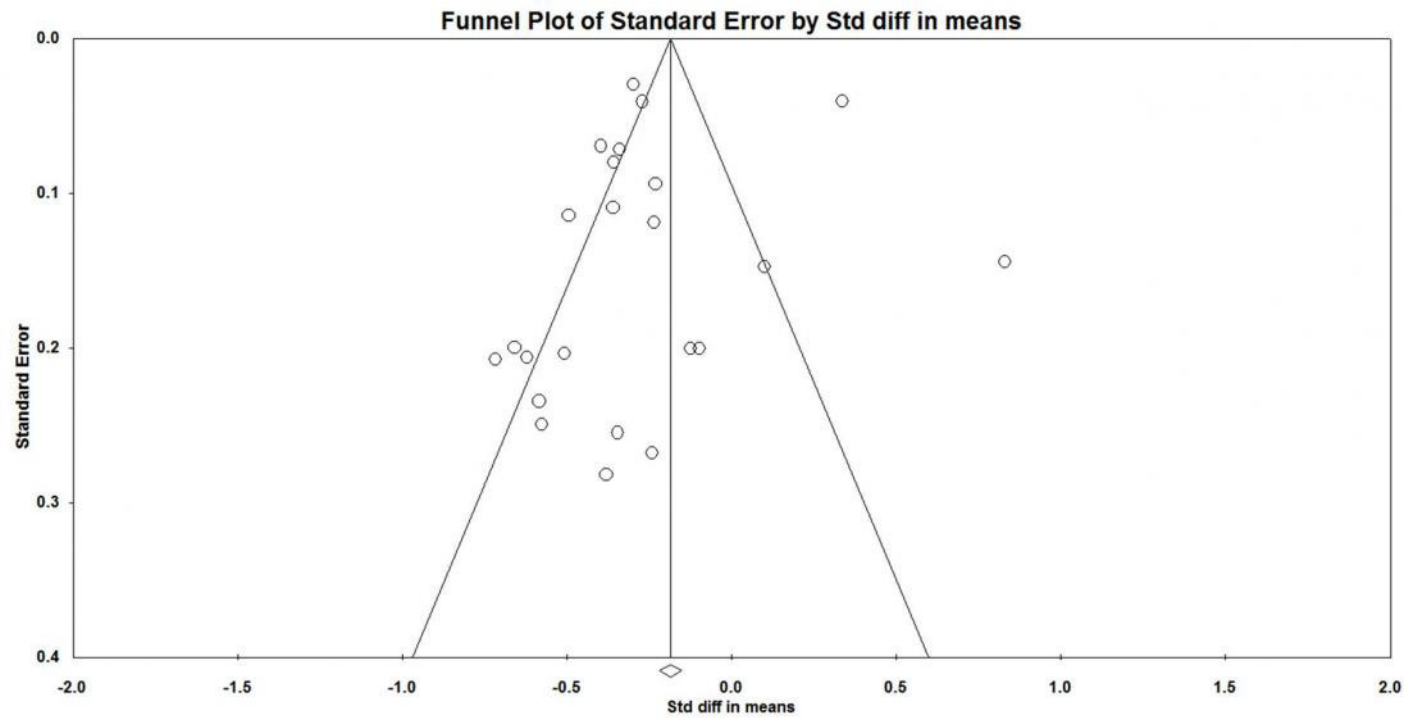

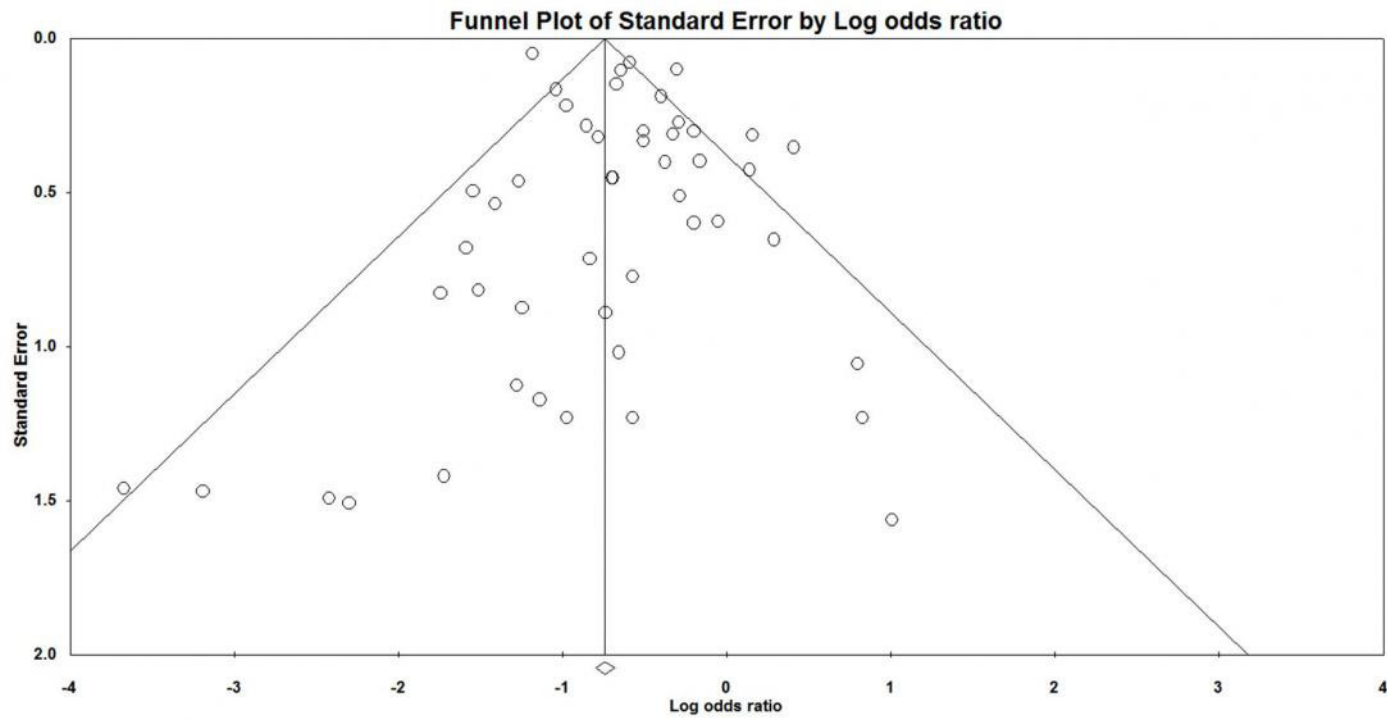

1  
2  
3  
4  
5  
6  
7  
8  
9  
10  
11  
12  
13  
14  
15  
16  
17  
18  
19  
20  
21  
22  
23  
24  
25  
26  
27  
28  
29  
30  
31  
32  
33  
34  
35  
36  
37  
38  
39  
40  
41  
42  
43  
44  
45  
46

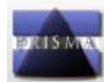

# PRISMA 2009 Checklist

| Section/topic                      | #  | Checklist item                                                                                                                                                                                                                                                                                              | Reported on page # |
|------------------------------------|----|-------------------------------------------------------------------------------------------------------------------------------------------------------------------------------------------------------------------------------------------------------------------------------------------------------------|--------------------|
| <b>TITLE</b>                       |    |                                                                                                                                                                                                                                                                                                             |                    |
| Title                              | 1  | Identify the report as a systematic review, meta-analysis, or both.                                                                                                                                                                                                                                         | 1                  |
| <b>ABSTRACT</b>                    |    |                                                                                                                                                                                                                                                                                                             |                    |
| Structured summary                 | 2  | Provide a structured summary including, as applicable: background; objectives; data sources; study eligibility criteria, participants, and interventions; study appraisal and synthesis methods; results; limitations; conclusions and implications of key findings; systematic review registration number. | 2                  |
| <b>INTRODUCTION</b>                |    |                                                                                                                                                                                                                                                                                                             |                    |
| Rationale                          | 3  | Describe the rationale for the review in the context of what is already known.                                                                                                                                                                                                                              | 4                  |
| Objectives                         | 4  | Provide an explicit statement of questions being addressed with reference to participants, interventions, comparisons, outcomes, and study design (PICOS).                                                                                                                                                  | 5                  |
| <b>METHODS</b>                     |    |                                                                                                                                                                                                                                                                                                             |                    |
| Protocol and registration          | 5  | Indicate if a review protocol exists, if and where it can be accessed (e.g., Web address), and, if available, provide registration information including registration number.                                                                                                                               | 5                  |
| Eligibility criteria               | 6  | Specify study characteristics (e.g., PICOS, length of follow-up) and report characteristics (e.g., years considered, language, publication status) used as criteria for eligibility, giving rationale.                                                                                                      | 5-6                |
| Information sources                | 7  | Describe all information sources (e.g., databases with dates of coverage, contact with study authors to identify additional studies) in the search and date last searched.                                                                                                                                  | 5                  |
| Search                             | 8  | Present full electronic search strategy for at least one database, including any limits used, such that it could be repeated.                                                                                                                                                                               | Appendix 1         |
| Study selection                    | 9  | State the process for selecting studies (i.e., screening, eligibility, included in systematic review, and, if applicable, included in the meta-analysis).                                                                                                                                                   | 8                  |
| Data collection process            | 10 | Describe method of data extraction from reports (e.g., piloted forms, independently, in duplicate) and any processes for obtaining and confirming data from investigators.                                                                                                                                  | 6                  |
| Data items                         | 11 | List and define all variables for which data were sought (e.g., PICOS, funding sources) and any assumptions and simplifications made.                                                                                                                                                                       | 6-8                |
| Risk of bias in individual studies | 12 | Describe methods used for assessing risk of bias of individual studies (including specification of whether this was done at the study or outcome level), and how this information is to be used in any data synthesis.                                                                                      | 7                  |
| Summary measures                   | 13 | State the principal summary measures (e.g., risk ratio, difference in means).                                                                                                                                                                                                                               | 7-8                |
| Synthesis of results               | 14 | Describe the methods of handling data and combining results of studies, if done, including measures of consistency (e.g., $I^2$ ) for each meta-analysis.                                                                                                                                                   | 7-8                |

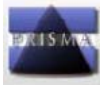

# PRISMA 2009 Checklist

| Section/topic                 | #  | Checklist item                                                                                                                                                                                           | Reported on page # |
|-------------------------------|----|----------------------------------------------------------------------------------------------------------------------------------------------------------------------------------------------------------|--------------------|
| Risk of bias across studies   | 15 | Specify any assessment of risk of bias that may affect the cumulative evidence (e.g., publication bias, selective reporting within studies).                                                             | 8                  |
| Additional analyses           | 16 | Describe methods of additional analyses (e.g., sensitivity or subgroup analyses, meta-regression), if done, indicating which were pre-specified.                                                         | 7                  |
| <b>RESULTS</b>                |    |                                                                                                                                                                                                          |                    |
| Study selection               | 17 | Give numbers of studies screened, assessed for eligibility, and included in the review, with reasons for exclusions at each stage, ideally with a flow diagram.                                          | 8                  |
| Study characteristics         | 18 | For each study, present characteristics for which data were extracted (e.g., study size, PICOS, follow-up period) and provide the citations.                                                             | 10-13              |
| Risk of bias within studies   | 19 | Present data on risk of bias of each study and, if available, any outcome level assessment (see item 12).                                                                                                | 9                  |
| Results of individual studies | 20 | For all outcomes considered (benefits or harms), present, for each study: (a) simple summary data for each intervention group (b) effect estimates and confidence intervals, ideally with a forest plot. | 14                 |
| Synthesis of results          | 21 | Present results of each meta-analysis done, including confidence intervals and measures of consistency.                                                                                                  | 14-20              |
| Risk of bias across studies   | 22 | Present results of any assessment of risk of bias across studies (see Item 15).                                                                                                                          | 10-13              |
| Additional analysis           | 23 | Give results of additional analyses, if done (e.g., sensitivity or subgroup analyses, meta-regression [see Item 16]).                                                                                    | 19                 |
| <b>DISCUSSION</b>             |    |                                                                                                                                                                                                          |                    |
| Summary of evidence           | 24 | Summarize the main findings including the strength of evidence for each main outcome; consider their relevance to key groups (e.g., healthcare providers, users, and policy makers).                     | 20-21              |
| Limitations                   | 25 | Discuss limitations at study and outcome level (e.g., risk of bias), and at review-level (e.g., incomplete retrieval of identified research, reporting bias).                                            | 21-23              |
| Conclusions                   | 26 | Provide a general interpretation of the results in the context of other evidence, and implications for future research.                                                                                  | 22                 |
| <b>FUNDING</b>                |    |                                                                                                                                                                                                          |                    |
| Funding                       | 27 | Describe sources of funding for the systematic review and other support (e.g., supply of data); role of funders for the systematic review.                                                               | 24                 |

From: Moher D, Liberati A, Tetzlaff J, Altman DG, The PRISMA Group (2009). Preferred Reporting Items for Systematic Reviews and Meta-Analyses: The PRISMA Statement. PLoS Med 6(7): e1000097. doi:10.1371/journal.pmed1000097

For more information, visit: [www.prisma-statement.org](http://www.prisma-statement.org).
