# Supplementary material for: Can obesity and physical activity predict outcomes of elective knee or hip surgery due to osteoarthritis? A meta-analysis of cohort studies
Source: PubMed Central journal article supplement — BMJ Open. 2018 Feb 27;8(2):e017689. doi: 10.1136/bmjopen-2017-017689 (PMC5855486; doi:10.1136/bmjopen-2017-017689), 2018-02-27
Supplement: bmjopen-2017-017689supp001.pdf [file bmjopen-2017-017689supp001.pdf]

## APPENDIX 1

### MEDLINE search strategy terms used:

|           |                                                                                                                                                                            |                  |
|-----------|----------------------------------------------------------------------------------------------------------------------------------------------------------------------------|------------------|
| 1         | obesity.mp. or exp Obesity/ or exp Obesity, Abdominal/                                                                                                                     | 197.941          |
| 2         | Physical Activity.mp. or exp Motor Activity/                                                                                                                               | 231.947          |
| 3         | sedentar\$.mp.<br>(time adj5 sitting).mp. [mp=title, abstract, original title, name of substance                                                                           | 19.058           |
| 4         | word, subject heading word, keyword heading word, protocol supplementary<br>concept word, rare disease supplementary concept word, unique identifier]                      | 688              |
| <b>5</b>  | <b>1 or 2 or 3 or 4</b>                                                                                                                                                    | <b>414.967</b>   |
| 6         | exp Postoperative Complications/ or exp Hip Prosthesis/ or exp Arthroplasty,<br>Replacement, Hip/ or hip arthroplasty.mp. or exp Osteoarthritis, Hip/ or exp<br>Hip Joint/ | 469.282          |
| 7         | knee arthroplasty.mp. or exp Arthroplasty, Replacement, Knee/                                                                                                              | 17.365           |
| 8         | exp Elective Surgical Procedures/ or elective surgery.mp.                                                                                                                  | 14.058           |
| 9         | osteoarthritis.mp. or exp Osteoarthritis, Hip/ or exp Osteoarthritis/ or exp<br>Osteoarthritis, Knee/                                                                      | 55.493           |
| 10        | exp Osteonecrosis/ or Osteonecrosis.mp.                                                                                                                                    | 13.961           |
| 11        | arthroplasty.mp. or exp Arthroplasty, Replacement, Knee/ or exp Arthroplasty,<br>Replacement/ or exp Arthroplasty/ or exp Arthroplasty, Replacement, Hip/                  | 53.979           |
| <b>12</b> | <b>6 or 7 or 8 or 9 or 10 or 11</b>                                                                                                                                        | <b>546.616</b>   |
| 13        | exp Cohort Studies/ or cohort.mp.                                                                                                                                          | 1.526.984        |
| 14        | incidence.mp. or exp Incidence/                                                                                                                                            | 587.274          |
| 15        | exp Follow-Up Studies/ or follow-up.mp.                                                                                                                                    | 912.064          |
| 16        | prognosis.mp. or exp Prognosis/                                                                                                                                            | 1.273.869        |
| 17        | exp Prognosis/ or predictors.mp.                                                                                                                                           | 1.258.014        |
| 18        | exp Time Factors/ or course.mp.                                                                                                                                            | 1.403.404        |
| 19        | exp Survival Analysis/ or exp Survival/ or exp Survival Rate/ or survival.mp.                                                                                              | 843.771          |
| 20        | logistic.mp.                                                                                                                                                               | 198.801          |
| 21        | cox.mp.                                                                                                                                                                    | 84.820           |
| 22        | life table.mp. or exp Life Tables/                                                                                                                                         | 18.098           |
| 23        | log rank.mp. or exp Follow-Up Studies/                                                                                                                                     | 533.280          |
| <b>24</b> | <b>13 or 14 or 15 or 16 or 17 or 18 or 19 or 20 or 21 or 22 or 23</b>                                                                                                      | <b>4.460.132</b> |
| 25        | Animals/                                                                                                                                                                   | 5.495.334        |
| 26        | exp Editorial/ or editorial.mp.                                                                                                                                            | 376.114          |
| 27        | case report.mp. or exp Case Reports/                                                                                                                                       | 1.754.352        |
| 28        | letter.mp. or exp Letter/                                                                                                                                                  | 895.420          |
| 29        | 25 or 26 or 27 or 28                                                                                                                                                       | 8.184.015        |
| <b>30</b> | <b>5 and 12 and 24</b>                                                                                                                                                     | <b>7.601</b>     |
| <b>31</b> | <b>30 not 29</b>                                                                                                                                                           | <b>6.869</b>     |
