# Supplementary figures and images for: Can obesity and physical activity predict outcomes of elective knee or hip surgery due to osteoarthritis? A meta-analysis of cohort studies
Source: PubMed Central journal article supplement — BMJ Open. 2018 Feb 27;8(2):e017689. doi: 10.1136/bmjopen-2017-017689 (PMC5855486; doi:10.1136/bmjopen-2017-017689), 2018-02-27

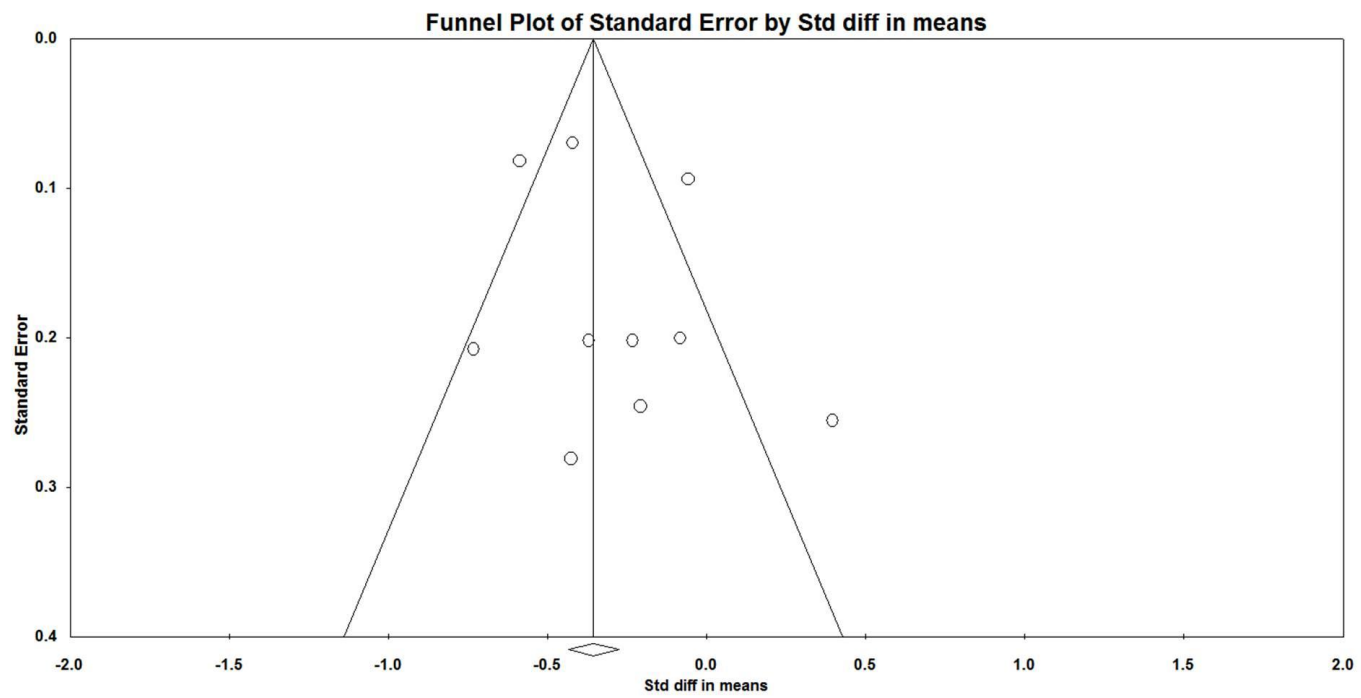

Supplement: bmjopen-2017-017689supp003.pdf [file bmjopen-2017-017689supp003.pdf]

Funnel Plot of Standard Error by Std diff in means

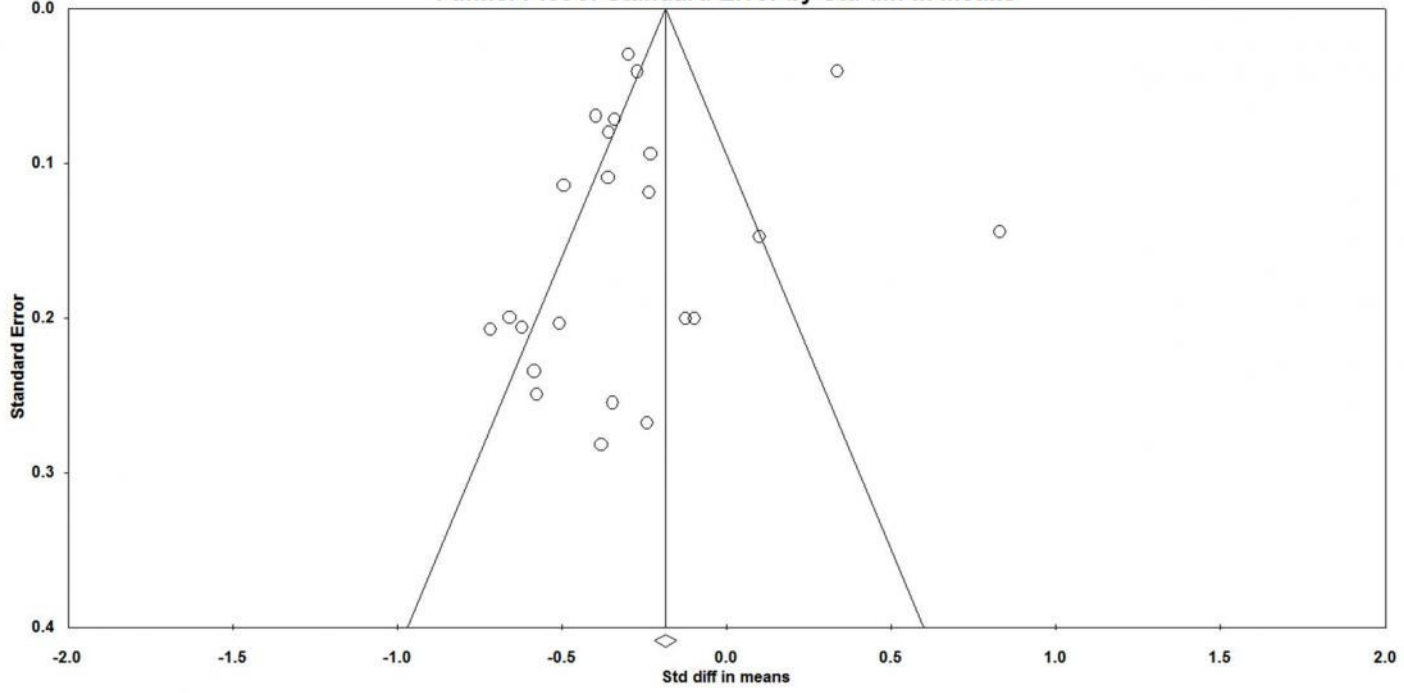

Supplement: bmjopen-2017-017689supp004.pdf [file bmjopen-2017-017689supp004.pdf]

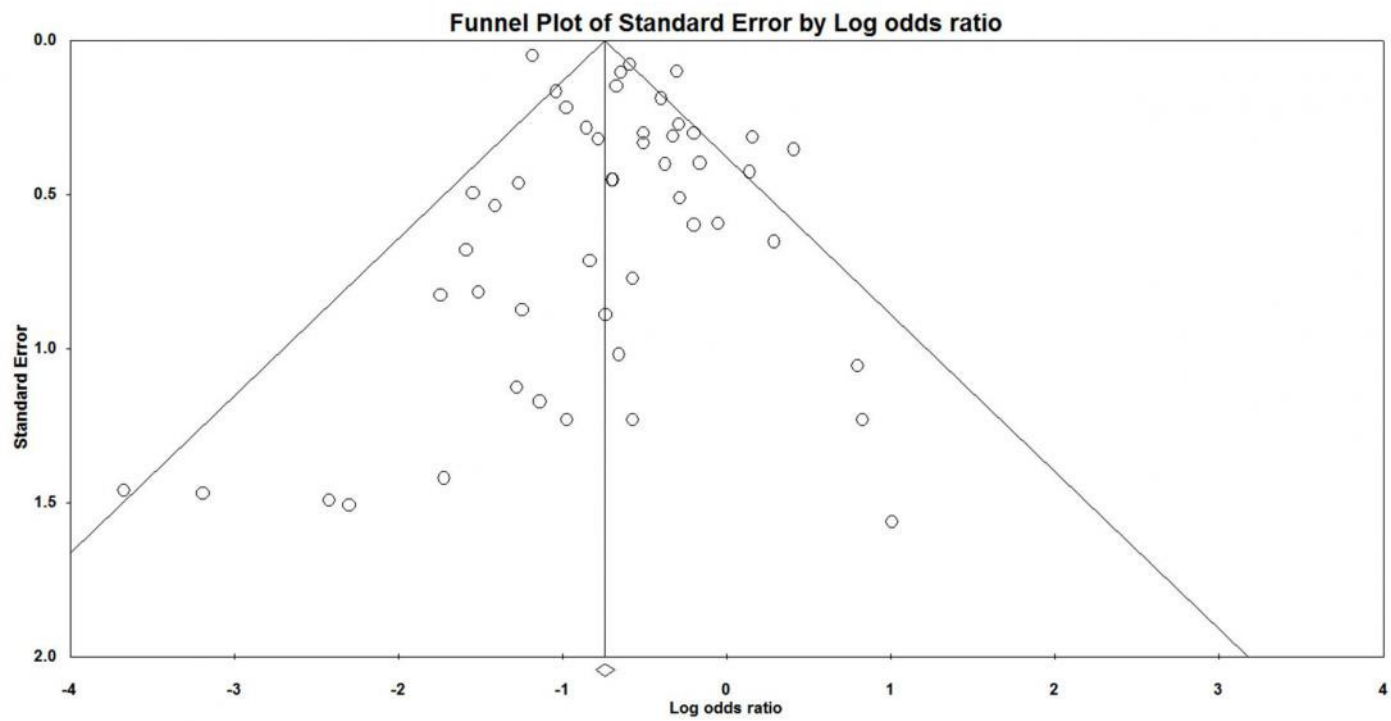

Supplement: bmjopen-2017-017689supp005.pdf [file bmjopen-2017-017689supp005.pdf]
